# Supplementary material for: RNAi based transcriptome suggests genes potentially regulated by HSF1 in the Pacific oyster Crassostrea gigas under thermal stress
Source: BMC Genomics. 2019 Aug 8;20:639. doi: 10.1186/s12864-019-6003-8 (PMC6688261; doi:10.1186/s12864-019-6003-8)
Supplement: Supplementary file 3 — Table S2. New gene of Crassostrea gigas discovered after filtering (the parameters we applied with StringTie are: -p 6 --merge -F 0.1 -T 0.1 -i -eB -p 6). (XLSX 3207 kb) [file 12864_2019_6003_MOESM3_ESM.xlsx]

## Sheet: C. gigas.newGene_final_gff
Table S2. New gene of Crassostrea gigas discovered after filtering (the parameters we applied with StringTie are: -p 6 --merge -F 0.1 -T 0.1 -i -eB -p 6).
#Seq_ID	Source	Type	Start	End	Score	Strand	Phase	Attributes
scaffold1163	StringTie	gene	35887	38481	.	-	.	ID=Crassostrea_gigas_newGene_100
scaffold1163	StringTie	mRNA	35887	38481	.	-	.	ID=Crassostrea_gigas_newGene_100.1;Parent=Crassostrea_gigas_newGene_100
scaffold1163	StringTie	CDS	35887	37078	.	-	.	Parent=Crassostrea_gigas_newGene_100.1
scaffold1163	StringTie	CDS	37349	37395	.	-	.	Parent=Crassostrea_gigas_newGene_100.1
scaffold1163	StringTie	CDS	37704	37722	.	-	.	Parent=Crassostrea_gigas_newGene_100.1
scaffold1163	StringTie	CDS	37894	38016	.	-	.	Parent=Crassostrea_gigas_newGene_100.1
scaffold1163	StringTie	CDS	38292	38481	.	-	.	Parent=Crassostrea_gigas_newGene_100.1
scaffold175	StringTie	gene	353391	362100	.	-	.	ID=Crassostrea_gigas_newGene_10008
scaffold175	StringTie	mRNA	353391	362100	.	-	.	ID=Crassostrea_gigas_newGene_10008.1;Parent=Crassostrea_gigas_newGene_10008
scaffold175	StringTie	CDS	353391	355714	.	-	.	Parent=Crassostrea_gigas_newGene_10008.1
scaffold175	StringTie	CDS	356285	356483	.	-	.	Parent=Crassostrea_gigas_newGene_10008.1
scaffold175	StringTie	CDS	358414	358517	.	-	.	Parent=Crassostrea_gigas_newGene_10008.1
scaffold175	StringTie	CDS	359111	359215	.	-	.	Parent=Crassostrea_gigas_newGene_10008.1
scaffold175	StringTie	CDS	361880	362100	.	-	.	Parent=Crassostrea_gigas_newGene_10008.1
scaffold175	StringTie	gene	385037	387812	.	-	.	ID=Crassostrea_gigas_newGene_10009
scaffold175	StringTie	mRNA	385037	387812	.	-	.	ID=Crassostrea_gigas_newGene_10009.1;Parent=Crassostrea_gigas_newGene_10009
scaffold175	StringTie	CDS	385037	385951	.	-	.	Parent=Crassostrea_gigas_newGene_10009.1
scaffold175	StringTie	CDS	387419	387526	.	-	.	Parent=Crassostrea_gigas_newGene_10009.1
scaffold175	StringTie	CDS	387720	387812	.	-	.	Parent=Crassostrea_gigas_newGene_10009.1
scaffold175	StringTie	gene	494875	498892	.	+	.	ID=Crassostrea_gigas_newGene_10012
scaffold175	StringTie	mRNA	494875	498892	.	+	.	ID=Crassostrea_gigas_newGene_10012.1;Parent=Crassostrea_gigas_newGene_10012
scaffold175	StringTie	CDS	494875	495107	.	+	.	Parent=Crassostrea_gigas_newGene_10012.1
scaffold175	StringTie	CDS	496621	496695	.	+	.	Parent=Crassostrea_gigas_newGene_10012.1
scaffold175	StringTie	CDS	497154	497258	.	+	.	Parent=Crassostrea_gigas_newGene_10012.1
scaffold175	StringTie	CDS	497748	497808	.	+	.	Parent=Crassostrea_gigas_newGene_10012.1
scaffold175	StringTie	CDS	497942	498077	.	+	.	Parent=Crassostrea_gigas_newGene_10012.1
scaffold175	StringTie	CDS	498217	498286	.	+	.	Parent=Crassostrea_gigas_newGene_10012.1
scaffold175	StringTie	CDS	498501	498578	.	+	.	Parent=Crassostrea_gigas_newGene_10012.1
scaffold175	StringTie	CDS	498845	498892	.	+	.	Parent=Crassostrea_gigas_newGene_10012.1
scaffold175	StringTie	mRNA	494949	498880	.	+	.	ID=Crassostrea_gigas_newGene_10012.2;Parent=Crassostrea_gigas_newGene_10012
scaffold175	StringTie	CDS	494949	495107	.	+	.	Parent=Crassostrea_gigas_newGene_10012.2
scaffold175	StringTie	CDS	496621	496683	.	+	.	Parent=Crassostrea_gigas_newGene_10012.2
scaffold175	StringTie	CDS	497154	497258	.	+	.	Parent=Crassostrea_gigas_newGene_10012.2
scaffold175	StringTie	CDS	497748	497808	.	+	.	Parent=Crassostrea_gigas_newGene_10012.2
scaffold175	StringTie	CDS	497942	498077	.	+	.	Parent=Crassostrea_gigas_newGene_10012.2
scaffold175	StringTie	CDS	498217	498286	.	+	.	Parent=Crassostrea_gigas_newGene_10012.2
scaffold175	StringTie	CDS	498501	498578	.	+	.	Parent=Crassostrea_gigas_newGene_10012.2
scaffold175	StringTie	CDS	498845	498880	.	+	.	Parent=Crassostrea_gigas_newGene_10012.2
scaffold175	StringTie	gene	543192	553207	.	+	.	ID=Crassostrea_gigas_newGene_10013
scaffold175	StringTie	mRNA	543192	553207	.	+	.	ID=Crassostrea_gigas_newGene_10013.1;Parent=Crassostrea_gigas_newGene_10013
scaffold175	StringTie	CDS	543192	543299	.	+	.	Parent=Crassostrea_gigas_newGene_10013.1
scaffold175	StringTie	CDS	547782	548028	.	+	.	Parent=Crassostrea_gigas_newGene_10013.1
scaffold175	StringTie	CDS	548421	548612	.	+	.	Parent=Crassostrea_gigas_newGene_10013.1
scaffold175	StringTie	CDS	551425	551563	.	+	.	Parent=Crassostrea_gigas_newGene_10013.1
scaffold175	StringTie	CDS	551832	551919	.	+	.	Parent=Crassostrea_gigas_newGene_10013.1
scaffold175	StringTie	CDS	552048	552432	.	+	.	Parent=Crassostrea_gigas_newGene_10013.1
scaffold175	StringTie	CDS	552895	552953	.	+	.	Parent=Crassostrea_gigas_newGene_10013.1
scaffold175	StringTie	CDS	553067	553207	.	+	.	Parent=Crassostrea_gigas_newGene_10013.1
scaffold175	StringTie	gene	564579	577508	.	-	.	ID=Crassostrea_gigas_newGene_10015
scaffold175	StringTie	mRNA	564579	577508	.	-	.	ID=Crassostrea_gigas_newGene_10015.1;Parent=Crassostrea_gigas_newGene_10015
scaffold175	StringTie	CDS	564579	565192	.	-	.	Parent=Crassostrea_gigas_newGene_10015.1
scaffold175	StringTie	CDS	566607	566663	.	-	.	Parent=Crassostrea_gigas_newGene_10015.1
scaffold175	StringTie	CDS	567935	568019	.	-	.	Parent=Crassostrea_gigas_newGene_10015.1
scaffold175	StringTie	CDS	573843	574136	.	-	.	Parent=Crassostrea_gigas_newGene_10015.1
scaffold175	StringTie	CDS	574382	574497	.	-	.	Parent=Crassostrea_gigas_newGene_10015.1
scaffold175	StringTie	CDS	575427	575565	.	-	.	Parent=Crassostrea_gigas_newGene_10015.1
scaffold175	StringTie	CDS	577318	577508	.	-	.	Parent=Crassostrea_gigas_newGene_10015.1
scaffold175	StringTie	mRNA	564851	577491	.	-	.	ID=Crassostrea_gigas_newGene_10015.2;Parent=Crassostrea_gigas_newGene_10015
scaffold175	StringTie	CDS	564851	565192	.	-	.	Parent=Crassostrea_gigas_newGene_10015.2
scaffold175	StringTie	CDS	566607	566663	.	-	.	Parent=Crassostrea_gigas_newGene_10015.2
scaffold175	StringTie	CDS	567935	568019	.	-	.	Parent=Crassostrea_gigas_newGene_10015.2
scaffold175	StringTie	CDS	573843	573897	.	-	.	Parent=Crassostrea_gigas_newGene_10015.2
scaffold175	StringTie	CDS	574093	574136	.	-	.	Parent=Crassostrea_gigas_newGene_10015.2
scaffold175	StringTie	CDS	574382	574497	.	-	.	Parent=Crassostrea_gigas_newGene_10015.2
scaffold175	StringTie	CDS	575427	575565	.	-	.	Parent=Crassostrea_gigas_newGene_10015.2
scaffold175	StringTie	CDS	577318	577491	.	-	.	Parent=Crassostrea_gigas_newGene_10015.2
scaffold175	StringTie	mRNA	564857	577508	.	-	.	ID=Crassostrea_gigas_newGene_10015.3;Parent=Crassostrea_gigas_newGene_10015
scaffold175	StringTie	CDS	564857	565192	.	-	.	Parent=Crassostrea_gigas_newGene_10015.3
scaffold175	StringTie	CDS	566607	566663	.	-	.	Parent=Crassostrea_gigas_newGene_10015.3
scaffold175	StringTie	CDS	567935	568019	.	-	.	Parent=Crassostrea_gigas_newGene_10015.3
scaffold175	StringTie	CDS	573843	573861	.	-	.	Parent=Crassostrea_gigas_newGene_10015.3
scaffold175	StringTie	CDS	574057	574136	.	-	.	Parent=Crassostrea_gigas_newGene_10015.3
scaffold175	StringTie	CDS	574382	574497	.	-	.	Parent=Crassostrea_gigas_newGene_10015.3
scaffold175	StringTie	CDS	575427	575565	.	-	.	Parent=Crassostrea_gigas_newGene_10015.3
scaffold175	StringTie	CDS	577318	577508	.	-	.	Parent=Crassostrea_gigas_newGene_10015.3
scaffold175	StringTie	mRNA	564902	575566	.	-	.	ID=Crassostrea_gigas_newGene_10015.4;Parent=Crassostrea_gigas_newGene_10015
scaffold175	StringTie	CDS	564902	565192	.	-	.	Parent=Crassostrea_gigas_newGene_10015.4
scaffold175	StringTie	CDS	566607	566663	.	-	.	Parent=Crassostrea_gigas_newGene_10015.4
scaffold175	StringTie	CDS	567935	568019	.	-	.	Parent=Crassostrea_gigas_newGene_10015.4
scaffold175	StringTie	CDS	573843	574136	.	-	.	Parent=Crassostrea_gigas_newGene_10015.4
scaffold175	StringTie	CDS	574382	574497	.	-	.	Parent=Crassostrea_gigas_newGene_10015.4
scaffold175	StringTie	CDS	574876	574900	.	-	.	Parent=Crassostrea_gigas_newGene_10015.4
scaffold175	StringTie	CDS	575242	575566	.	-	.	Parent=Crassostrea_gigas_newGene_10015.4
scaffold175	StringTie	mRNA	565943	577508	.	-	.	ID=Crassostrea_gigas_newGene_10015.5;Parent=Crassostrea_gigas_newGene_10015
scaffold175	StringTie	CDS	565943	566795	.	-	.	Parent=Crassostrea_gigas_newGene_10015.5
scaffold175	StringTie	CDS	567839	568019	.	-	.	Parent=Crassostrea_gigas_newGene_10015.5
scaffold175	StringTie	CDS	573843	573861	.	-	.	Parent=Crassostrea_gigas_newGene_10015.5
scaffold175	StringTie	CDS	574057	574136	.	-	.	Parent=Crassostrea_gigas_newGene_10015.5
scaffold175	StringTie	CDS	574382	574497	.	-	.	Parent=Crassostrea_gigas_newGene_10015.5
scaffold175	StringTie	CDS	575427	575565	.	-	.	Parent=Crassostrea_gigas_newGene_10015.5
scaffold175	StringTie	CDS	577318	577508	.	-	.	Parent=Crassostrea_gigas_newGene_10015.5
scaffold175	StringTie	mRNA	566774	575278	.	-	.	ID=Crassostrea_gigas_newGene_10015.6;Parent=Crassostrea_gigas_newGene_10015
scaffold175	StringTie	CDS	566774	568019	.	-	.	Parent=Crassostrea_gigas_newGene_10015.6
scaffold175	StringTie	CDS	571037	571083	.	-	.	Parent=Crassostrea_gigas_newGene_10015.6
scaffold175	StringTie	CDS	573843	574136	.	-	.	Parent=Crassostrea_gigas_newGene_10015.6
scaffold175	StringTie	CDS	574382	574497	.	-	.	Parent=Crassostrea_gigas_newGene_10015.6
scaffold175	StringTie	CDS	575218	575278	.	-	.	Parent=Crassostrea_gigas_newGene_10015.6
scaffold175	StringTie	gene	578224	579306	.	+	.	ID=Crassostrea_gigas_newGene_10016
scaffold175	StringTie	mRNA	578224	579306	.	+	.	ID=Crassostrea_gigas_newGene_10016.1;Parent=Crassostrea_gigas_newGene_10016
scaffold175	StringTie	CDS	578224	578476	.	+	.	Parent=Crassostrea_gigas_newGene_10016.1
scaffold175	StringTie	CDS	578605	579306	.	+	.	Parent=Crassostrea_gigas_newGene_10016.1
scaffold175	StringTie	gene	623746	632975	.	-	.	ID=Crassostrea_gigas_newGene_10018
scaffold175	StringTie	mRNA	623746	632974	.	-	.	ID=Crassostrea_gigas_newGene_10018.1;Parent=Crassostrea_gigas_newGene_10018
scaffold175	StringTie	CDS	623746	625041	.	-	.	Parent=Crassostrea_gigas_newGene_10018.1
scaffold175	StringTie	CDS	631030	631469	.	-	.	Parent=Crassostrea_gigas_newGene_10018.1
scaffold175	StringTie	CDS	632732	632974	.	-	.	Parent=Crassostrea_gigas_newGene_10018.1
scaffold175	StringTie	mRNA	623928	632975	.	-	.	ID=Crassostrea_gigas_newGene_10018.2;Parent=Crassostrea_gigas_newGene_10018
scaffold175	StringTie	CDS	623928	625041	.	-	.	Parent=Crassostrea_gigas_newGene_10018.2
scaffold175	StringTie	CDS	631030	631165	.	-	.	Parent=Crassostrea_gigas_newGene_10018.2
scaffold175	StringTie	CDS	632732	632975	.	-	.	Parent=Crassostrea_gigas_newGene_10018.2
scaffold175	StringTie	mRNA	629066	632892	.	-	.	ID=Crassostrea_gigas_newGene_10018.3;Parent=Crassostrea_gigas_newGene_10018
scaffold175	StringTie	CDS	629066	629263	.	-	.	Parent=Crassostrea_gigas_newGene_10018.3
scaffold175	StringTie	CDS	631030	631469	.	-	.	Parent=Crassostrea_gigas_newGene_10018.3
scaffold175	StringTie	CDS	632732	632892	.	-	.	Parent=Crassostrea_gigas_newGene_10018.3
scaffold175	StringTie	mRNA	630656	632957	.	-	.	ID=Crassostrea_gigas_newGene_10018.4;Parent=Crassostrea_gigas_newGene_10018
scaffold175	StringTie	CDS	630656	631165	.	-	.	Parent=Crassostrea_gigas_newGene_10018.4
scaffold175	StringTie	CDS	631287	632957	.	-	.	Parent=Crassostrea_gigas_newGene_10018.4
scaffold175	StringTie	mRNA	630742	632975	.	-	.	ID=Crassostrea_gigas_newGene_10018.5;Parent=Crassostrea_gigas_newGene_10018
scaffold175	StringTie	CDS	630742	631165	.	-	.	Parent=Crassostrea_gigas_newGene_10018.5
scaffold175	StringTie	CDS	631365	632975	.	-	.	Parent=Crassostrea_gigas_newGene_10018.5
scaffold175	StringTie	gene	653686	660724	.	+	.	ID=Crassostrea_gigas_newGene_10019
scaffold175	StringTie	mRNA	653686	660724	.	+	.	ID=Crassostrea_gigas_newGene_10019.1;Parent=Crassostrea_gigas_newGene_10019
scaffold175	StringTie	CDS	653686	654943	.	+	.	Parent=Crassostrea_gigas_newGene_10019.1
scaffold175	StringTie	CDS	657454	657723	.	+	.	Parent=Crassostrea_gigas_newGene_10019.1
scaffold175	StringTie	CDS	657821	657937	.	+	.	Parent=Crassostrea_gigas_newGene_10019.1
scaffold175	StringTie	CDS	658445	659087	.	+	.	Parent=Crassostrea_gigas_newGene_10019.1
scaffold175	StringTie	CDS	659172	659337	.	+	.	Parent=Crassostrea_gigas_newGene_10019.1
scaffold175	StringTie	CDS	659464	659852	.	+	.	Parent=Crassostrea_gigas_newGene_10019.1
scaffold175	StringTie	CDS	659961	660724	.	+	.	Parent=Crassostrea_gigas_newGene_10019.1
scaffold175	StringTie	mRNA	654062	660724	.	+	.	ID=Crassostrea_gigas_newGene_10019.2;Parent=Crassostrea_gigas_newGene_10019
scaffold175	StringTie	CDS	654062	654619	.	+	.	Parent=Crassostrea_gigas_newGene_10019.2
scaffold175	StringTie	CDS	654885	654943	.	+	.	Parent=Crassostrea_gigas_newGene_10019.2
scaffold175	StringTie	CDS	657454	657697	.	+	.	Parent=Crassostrea_gigas_newGene_10019.2
scaffold175	StringTie	CDS	657821	657937	.	+	.	Parent=Crassostrea_gigas_newGene_10019.2
scaffold175	StringTie	CDS	658445	659087	.	+	.	Parent=Crassostrea_gigas_newGene_10019.2
scaffold175	StringTie	CDS	659172	659337	.	+	.	Parent=Crassostrea_gigas_newGene_10019.2
scaffold175	StringTie	CDS	659464	659852	.	+	.	Parent=Crassostrea_gigas_newGene_10019.2
scaffold175	StringTie	CDS	659961	660724	.	+	.	Parent=Crassostrea_gigas_newGene_10019.2
scaffold175	StringTie	mRNA	654062	660724	.	+	.	ID=Crassostrea_gigas_newGene_10019.3;Parent=Crassostrea_gigas_newGene_10019
scaffold175	StringTie	CDS	654062	654774	.	+	.	Parent=Crassostrea_gigas_newGene_10019.3
scaffold175	StringTie	CDS	654885	654943	.	+	.	Parent=Crassostrea_gigas_newGene_10019.3
scaffold175	StringTie	CDS	657454	657697	.	+	.	Parent=Crassostrea_gigas_newGene_10019.3
scaffold175	StringTie	CDS	657821	657937	.	+	.	Parent=Crassostrea_gigas_newGene_10019.3
scaffold175	StringTie	CDS	658445	659087	.	+	.	Parent=Crassostrea_gigas_newGene_10019.3
scaffold175	StringTie	CDS	659172	659337	.	+	.	Parent=Crassostrea_gigas_newGene_10019.3
scaffold175	StringTie	CDS	659464	659852	.	+	.	Parent=Crassostrea_gigas_newGene_10019.3
scaffold175	StringTie	CDS	659961	660724	.	+	.	Parent=Crassostrea_gigas_newGene_10019.3
scaffold175	StringTie	mRNA	654548	660724	.	+	.	ID=Crassostrea_gigas_newGene_10019.4;Parent=Crassostrea_gigas_newGene_10019
scaffold175	StringTie	CDS	654548	654943	.	+	.	Parent=Crassostrea_gigas_newGene_10019.4
scaffold175	StringTie	CDS	657821	657937	.	+	.	Parent=Crassostrea_gigas_newGene_10019.4
scaffold175	StringTie	CDS	658445	659087	.	+	.	Parent=Crassostrea_gigas_newGene_10019.4
scaffold175	StringTie	CDS	659172	659337	.	+	.	Parent=Crassostrea_gigas_newGene_10019.4
scaffold175	StringTie	CDS	659464	659852	.	+	.	Parent=Crassostrea_gigas_newGene_10019.4
scaffold175	StringTie	CDS	659961	660724	.	+	.	Parent=Crassostrea_gigas_newGene_10019.4
scaffold1214	StringTie	gene	122751	123412	.	+	.	ID=Crassostrea_gigas_newGene_1002
scaffold1214	StringTie	mRNA	122751	123207	.	+	.	ID=Crassostrea_gigas_newGene_1002.1;Parent=Crassostrea_gigas_newGene_1002
scaffold1214	StringTie	CDS	122751	123087	.	+	.	Parent=Crassostrea_gigas_newGene_1002.1
scaffold1214	StringTie	CDS	123170	123207	.	+	.	Parent=Crassostrea_gigas_newGene_1002.1
C29904	StringTie	gene	476	2940	.	+	.	ID=Crassostrea_gigas_newGene_10022
C29904	StringTie	mRNA	476	2940	.	+	.	ID=Crassostrea_gigas_newGene_10022.1;Parent=Crassostrea_gigas_newGene_10022
C29904	StringTie	CDS	476	653	.	+	.	Parent=Crassostrea_gigas_newGene_10022.1
C29904	StringTie	CDS	1949	2940	.	+	.	Parent=Crassostrea_gigas_newGene_10022.1
scaffold175	StringTie	gene	672886	681984	.	+	.	ID=Crassostrea_gigas_newGene_10023
scaffold175	StringTie	mRNA	672886	681975	.	+	.	ID=Crassostrea_gigas_newGene_10023.1;Parent=Crassostrea_gigas_newGene_10023
scaffold175	StringTie	CDS	672886	673466	.	+	.	Parent=Crassostrea_gigas_newGene_10023.1
scaffold175	StringTie	CDS	674237	674612	.	+	.	Parent=Crassostrea_gigas_newGene_10023.1
scaffold175	StringTie	CDS	681575	681975	.	+	.	Parent=Crassostrea_gigas_newGene_10023.1
scaffold175	StringTie	mRNA	672886	681910	.	+	.	ID=Crassostrea_gigas_newGene_10023.2;Parent=Crassostrea_gigas_newGene_10023
scaffold175	StringTie	CDS	672886	673451	.	+	.	Parent=Crassostrea_gigas_newGene_10023.2
scaffold175	StringTie	CDS	674237	674612	.	+	.	Parent=Crassostrea_gigas_newGene_10023.2
scaffold175	StringTie	CDS	681575	681910	.	+	.	Parent=Crassostrea_gigas_newGene_10023.2
scaffold175	StringTie	mRNA	672903	681984	.	+	.	ID=Crassostrea_gigas_newGene_10023.3;Parent=Crassostrea_gigas_newGene_10023
scaffold175	StringTie	CDS	672903	674612	.	+	.	Parent=Crassostrea_gigas_newGene_10023.3
scaffold175	StringTie	CDS	681575	681984	.	+	.	Parent=Crassostrea_gigas_newGene_10023.3
scaffold175	StringTie	mRNA	672965	681975	.	+	.	ID=Crassostrea_gigas_newGene_10023.4;Parent=Crassostrea_gigas_newGene_10023
scaffold175	StringTie	CDS	672965	673350	.	+	.	Parent=Crassostrea_gigas_newGene_10023.4
scaffold175	StringTie	CDS	674237	674612	.	+	.	Parent=Crassostrea_gigas_newGene_10023.4
scaffold175	StringTie	CDS	681575	681975	.	+	.	Parent=Crassostrea_gigas_newGene_10023.4
scaffold175	StringTie	mRNA	673122	681884	.	+	.	ID=Crassostrea_gigas_newGene_10023.5;Parent=Crassostrea_gigas_newGene_10023
scaffold175	StringTie	CDS	673122	673350	.	+	.	Parent=Crassostrea_gigas_newGene_10023.5
scaffold175	StringTie	CDS	681575	681884	.	+	.	Parent=Crassostrea_gigas_newGene_10023.5
scaffold175	StringTie	mRNA	675686	681975	.	+	.	ID=Crassostrea_gigas_newGene_10023.6;Parent=Crassostrea_gigas_newGene_10023
scaffold175	StringTie	CDS	675686	675916	.	+	.	Parent=Crassostrea_gigas_newGene_10023.6
scaffold175	StringTie	CDS	681575	681975	.	+	.	Parent=Crassostrea_gigas_newGene_10023.6
scaffold175	StringTie	mRNA	676691	681975	.	+	.	ID=Crassostrea_gigas_newGene_10023.7;Parent=Crassostrea_gigas_newGene_10023
scaffold175	StringTie	CDS	676691	677119	.	+	.	Parent=Crassostrea_gigas_newGene_10023.7
scaffold175	StringTie	CDS	681575	681975	.	+	.	Parent=Crassostrea_gigas_newGene_10023.7
scaffold175	StringTie	mRNA	679525	681910	.	+	.	ID=Crassostrea_gigas_newGene_10023.8;Parent=Crassostrea_gigas_newGene_10023
scaffold175	StringTie	CDS	679525	679631	.	+	.	Parent=Crassostrea_gigas_newGene_10023.8
scaffold175	StringTie	CDS	681575	681910	.	+	.	Parent=Crassostrea_gigas_newGene_10023.8
scaffold175	StringTie	mRNA	679922	681975	.	+	.	ID=Crassostrea_gigas_newGene_10023.9;Parent=Crassostrea_gigas_newGene_10023
scaffold175	StringTie	CDS	679922	680302	.	+	.	Parent=Crassostrea_gigas_newGene_10023.9
scaffold175	StringTie	CDS	681575	681975	.	+	.	Parent=Crassostrea_gigas_newGene_10023.9
scaffold1750	StringTie	gene	82704	84141	.	-	.	ID=Crassostrea_gigas_newGene_10029
scaffold1750	StringTie	mRNA	82704	84141	.	-	.	ID=Crassostrea_gigas_newGene_10029.1;Parent=Crassostrea_gigas_newGene_10029
scaffold1750	StringTie	CDS	82704	82899	.	-	.	Parent=Crassostrea_gigas_newGene_10029.1
scaffold1750	StringTie	CDS	82965	84141	.	-	.	Parent=Crassostrea_gigas_newGene_10029.1
scaffold1214	StringTie	gene	166411	169639	.	-	.	ID=Crassostrea_gigas_newGene_1003
scaffold1214	StringTie	mRNA	166478	168895	.	-	.	ID=Crassostrea_gigas_newGene_1003.2;Parent=Crassostrea_gigas_newGene_1003
scaffold1214	StringTie	CDS	166478	167331	.	-	.	Parent=Crassostrea_gigas_newGene_1003.2
scaffold1214	StringTie	CDS	167604	168382	.	-	.	Parent=Crassostrea_gigas_newGene_1003.2
scaffold1214	StringTie	CDS	168496	168895	.	-	.	Parent=Crassostrea_gigas_newGene_1003.2
scaffold1750	StringTie	gene	86135	90157	.	-	.	ID=Crassostrea_gigas_newGene_10031
scaffold1750	StringTie	mRNA	86135	90157	.	-	.	ID=Crassostrea_gigas_newGene_10031.1;Parent=Crassostrea_gigas_newGene_10031
scaffold1750	StringTie	CDS	86135	86985	.	-	.	Parent=Crassostrea_gigas_newGene_10031.1
scaffold1750	StringTie	CDS	88744	90157	.	-	.	Parent=Crassostrea_gigas_newGene_10031.1
scaffold1750	StringTie	mRNA	86135	90157	.	-	.	ID=Crassostrea_gigas_newGene_10031.2;Parent=Crassostrea_gigas_newGene_10031
scaffold1750	StringTie	CDS	86135	88117	.	-	.	Parent=Crassostrea_gigas_newGene_10031.2
scaffold1750	StringTie	CDS	89876	90157	.	-	.	Parent=Crassostrea_gigas_newGene_10031.2
scaffold1750	StringTie	mRNA	86199	90148	.	-	.	ID=Crassostrea_gigas_newGene_10031.3;Parent=Crassostrea_gigas_newGene_10031
scaffold1750	StringTie	CDS	86199	87739	.	-	.	Parent=Crassostrea_gigas_newGene_10031.3
scaffold1750	StringTie	CDS	89498	90148	.	-	.	Parent=Crassostrea_gigas_newGene_10031.3
scaffold1750	StringTie	gene	86135	90157	.	+	.	ID=Crassostrea_gigas_newGene_10032
scaffold1750	StringTie	mRNA	86135	90157	.	+	.	ID=Crassostrea_gigas_newGene_10032.1;Parent=Crassostrea_gigas_newGene_10032
scaffold1750	StringTie	CDS	86135	87193	.	+	.	Parent=Crassostrea_gigas_newGene_10032.1
scaffold1750	StringTie	CDS	88952	90157	.	+	.	Parent=Crassostrea_gigas_newGene_10032.1
scaffold1750	StringTie	mRNA	86151	90150	.	+	.	ID=Crassostrea_gigas_newGene_10032.2;Parent=Crassostrea_gigas_newGene_10032
scaffold1750	StringTie	CDS	86151	87265	.	+	.	Parent=Crassostrea_gigas_newGene_10032.2
scaffold1750	StringTie	CDS	89024	90150	.	+	.	Parent=Crassostrea_gigas_newGene_10032.2
scaffold1750	StringTie	mRNA	86161	90149	.	+	.	ID=Crassostrea_gigas_newGene_10032.3;Parent=Crassostrea_gigas_newGene_10032
scaffold1750	StringTie	CDS	86161	87445	.	+	.	Parent=Crassostrea_gigas_newGene_10032.3
scaffold1750	StringTie	CDS	89204	90149	.	+	.	Parent=Crassostrea_gigas_newGene_10032.3
scaffold1750	StringTie	gene	144317	146817	.	-	.	ID=Crassostrea_gigas_newGene_10035
scaffold1750	StringTie	mRNA	144317	146817	.	-	.	ID=Crassostrea_gigas_newGene_10035.1;Parent=Crassostrea_gigas_newGene_10035
scaffold1750	StringTie	CDS	144317	144995	.	-	.	Parent=Crassostrea_gigas_newGene_10035.1
scaffold1750	StringTie	CDS	145454	145578	.	-	.	Parent=Crassostrea_gigas_newGene_10035.1
scaffold1750	StringTie	CDS	146027	146104	.	-	.	Parent=Crassostrea_gigas_newGene_10035.1
scaffold1750	StringTie	CDS	146333	146817	.	-	.	Parent=Crassostrea_gigas_newGene_10035.1
scaffold1750	StringTie	gene	163601	165585	.	-	.	ID=Crassostrea_gigas_newGene_10036
scaffold1750	StringTie	mRNA	163601	165585	.	-	.	ID=Crassostrea_gigas_newGene_10036.1;Parent=Crassostrea_gigas_newGene_10036
scaffold1750	StringTie	CDS	163601	164144	.	-	.	Parent=Crassostrea_gigas_newGene_10036.1
scaffold1750	StringTie	CDS	164735	165585	.	-	.	Parent=Crassostrea_gigas_newGene_10036.1
C29908	StringTie	gene	4470	5693	.	+	.	ID=Crassostrea_gigas_newGene_10042
C29908	StringTie	mRNA	4470	5693	.	+	.	ID=Crassostrea_gigas_newGene_10042.1;Parent=Crassostrea_gigas_newGene_10042
C29908	StringTie	CDS	4470	4970	.	+	.	Parent=Crassostrea_gigas_newGene_10042.1
C29908	StringTie	CDS	5515	5693	.	+	.	Parent=Crassostrea_gigas_newGene_10042.1
scaffold1750	StringTie	gene	320132	348696	.	+	.	ID=Crassostrea_gigas_newGene_10046
scaffold1750	StringTie	mRNA	320132	348696	.	+	.	ID=Crassostrea_gigas_newGene_10046.1;Parent=Crassostrea_gigas_newGene_10046
scaffold1750	StringTie	CDS	320132	320360	.	+	.	Parent=Crassostrea_gigas_newGene_10046.1
scaffold1750	StringTie	CDS	332939	332978	.	+	.	Parent=Crassostrea_gigas_newGene_10046.1
scaffold1750	StringTie	CDS	348645	348696	.	+	.	Parent=Crassostrea_gigas_newGene_10046.1
scaffold1750	StringTie	gene	320528	321199	.	-	.	ID=Crassostrea_gigas_newGene_10047
scaffold1750	StringTie	mRNA	320528	321199	.	-	.	ID=Crassostrea_gigas_newGene_10047.1;Parent=Crassostrea_gigas_newGene_10047
scaffold1750	StringTie	CDS	320528	320763	.	-	.	Parent=Crassostrea_gigas_newGene_10047.1
scaffold1750	StringTie	CDS	321168	321199	.	-	.	Parent=Crassostrea_gigas_newGene_10047.1
scaffold1750	StringTie	gene	386196	389432	.	+	.	ID=Crassostrea_gigas_newGene_10052
scaffold1750	StringTie	mRNA	386196	389432	.	+	.	ID=Crassostrea_gigas_newGene_10052.1;Parent=Crassostrea_gigas_newGene_10052
scaffold1750	StringTie	CDS	386196	386235	.	+	.	Parent=Crassostrea_gigas_newGene_10052.1
scaffold1750	StringTie	CDS	386523	386649	.	+	.	Parent=Crassostrea_gigas_newGene_10052.1
scaffold1750	StringTie	CDS	389389	389432	.	+	.	Parent=Crassostrea_gigas_newGene_10052.1
scaffold1750	StringTie	gene	481865	484747	.	+	.	ID=Crassostrea_gigas_newGene_10065
scaffold1750	StringTie	mRNA	481865	484747	.	+	.	ID=Crassostrea_gigas_newGene_10065.1;Parent=Crassostrea_gigas_newGene_10065
scaffold1750	StringTie	CDS	481865	481914	.	+	.	Parent=Crassostrea_gigas_newGene_10065.1
scaffold1750	StringTie	CDS	482561	484747	.	+	.	Parent=Crassostrea_gigas_newGene_10065.1
scaffold1750	StringTie	gene	481919	484488	.	-	.	ID=Crassostrea_gigas_newGene_10066
scaffold1750	StringTie	mRNA	481919	484488	.	-	.	ID=Crassostrea_gigas_newGene_10066.1;Parent=Crassostrea_gigas_newGene_10066
scaffold1750	StringTie	CDS	481919	481945	.	-	.	Parent=Crassostrea_gigas_newGene_10066.1
scaffold1750	StringTie	CDS	482592	484488	.	-	.	Parent=Crassostrea_gigas_newGene_10066.1
scaffold1750	StringTie	gene	541680	542691	.	+	.	ID=Crassostrea_gigas_newGene_10073
scaffold1750	StringTie	mRNA	541694	542691	.	+	.	ID=Crassostrea_gigas_newGene_10073.2;Parent=Crassostrea_gigas_newGene_10073
scaffold1750	StringTie	CDS	541694	542488	.	+	.	Parent=Crassostrea_gigas_newGene_10073.2
scaffold1750	StringTie	CDS	542532	542691	.	+	.	Parent=Crassostrea_gigas_newGene_10073.2
scaffold1750	StringTie	gene	566291	576740	.	-	.	ID=Crassostrea_gigas_newGene_10078
scaffold1750	StringTie	mRNA	566291	576740	.	-	.	ID=Crassostrea_gigas_newGene_10078.1;Parent=Crassostrea_gigas_newGene_10078
scaffold1750	StringTie	CDS	566291	567556	.	-	.	Parent=Crassostrea_gigas_newGene_10078.1
scaffold1750	StringTie	CDS	567682	567780	.	-	.	Parent=Crassostrea_gigas_newGene_10078.1
scaffold1750	StringTie	CDS	568007	568204	.	-	.	Parent=Crassostrea_gigas_newGene_10078.1
scaffold1750	StringTie	CDS	571597	571710	.	-	.	Parent=Crassostrea_gigas_newGene_10078.1
scaffold1750	StringTie	CDS	572903	572998	.	-	.	Parent=Crassostrea_gigas_newGene_10078.1
scaffold1750	StringTie	CDS	573096	573344	.	-	.	Parent=Crassostrea_gigas_newGene_10078.1
scaffold1750	StringTie	CDS	573462	573542	.	-	.	Parent=Crassostrea_gigas_newGene_10078.1
scaffold1750	StringTie	CDS	574670	574796	.	-	.	Parent=Crassostrea_gigas_newGene_10078.1
scaffold1750	StringTie	CDS	575039	575090	.	-	.	Parent=Crassostrea_gigas_newGene_10078.1
scaffold1750	StringTie	CDS	576618	576740	.	-	.	Parent=Crassostrea_gigas_newGene_10078.1
scaffold1750	StringTie	mRNA	573483	576736	.	-	.	ID=Crassostrea_gigas_newGene_10078.2;Parent=Crassostrea_gigas_newGene_10078
scaffold1750	StringTie	CDS	573483	573542	.	-	.	Parent=Crassostrea_gigas_newGene_10078.2
scaffold1750	StringTie	CDS	574670	574796	.	-	.	Parent=Crassostrea_gigas_newGene_10078.2
scaffold1750	StringTie	CDS	575039	575106	.	-	.	Parent=Crassostrea_gigas_newGene_10078.2
scaffold1750	StringTie	CDS	576618	576736	.	-	.	Parent=Crassostrea_gigas_newGene_10078.2
scaffold1750	StringTie	gene	588705	589780	.	-	.	ID=Crassostrea_gigas_newGene_10082
scaffold1750	StringTie	mRNA	588705	589780	.	-	.	ID=Crassostrea_gigas_newGene_10082.1;Parent=Crassostrea_gigas_newGene_10082
scaffold1750	StringTie	CDS	588705	588858	.	-	.	Parent=Crassostrea_gigas_newGene_10082.1
scaffold1750	StringTie	CDS	588991	589072	.	-	.	Parent=Crassostrea_gigas_newGene_10082.1
scaffold1750	StringTie	CDS	589325	589522	.	-	.	Parent=Crassostrea_gigas_newGene_10082.1
scaffold1750	StringTie	CDS	589695	589780	.	-	.	Parent=Crassostrea_gigas_newGene_10082.1
scaffold1750	StringTie	gene	594472	610930	.	-	.	ID=Crassostrea_gigas_newGene_10086
scaffold1750	StringTie	mRNA	594472	610865	.	-	.	ID=Crassostrea_gigas_newGene_10086.1;Parent=Crassostrea_gigas_newGene_10086
scaffold1750	StringTie	CDS	594472	596109	.	-	.	Parent=Crassostrea_gigas_newGene_10086.1
scaffold1750	StringTie	CDS	596243	596341	.	-	.	Parent=Crassostrea_gigas_newGene_10086.1
scaffold1750	StringTie	CDS	596584	596781	.	-	.	Parent=Crassostrea_gigas_newGene_10086.1
scaffold1750	StringTie	CDS	597870	597983	.	-	.	Parent=Crassostrea_gigas_newGene_10086.1
scaffold1750	StringTie	CDS	598289	598384	.	-	.	Parent=Crassostrea_gigas_newGene_10086.1
scaffold1750	StringTie	CDS	598484	598732	.	-	.	Parent=Crassostrea_gigas_newGene_10086.1
scaffold1750	StringTie	CDS	598850	598930	.	-	.	Parent=Crassostrea_gigas_newGene_10086.1
scaffold1750	StringTie	CDS	606366	606431	.	-	.	Parent=Crassostrea_gigas_newGene_10086.1
scaffold1750	StringTie	CDS	610835	610865	.	-	.	Parent=Crassostrea_gigas_newGene_10086.1
scaffold1750	StringTie	mRNA	594472	610865	.	-	.	ID=Crassostrea_gigas_newGene_10086.2;Parent=Crassostrea_gigas_newGene_10086
scaffold1750	StringTie	CDS	594472	596109	.	-	.	Parent=Crassostrea_gigas_newGene_10086.2
scaffold1750	StringTie	CDS	596243	596367	.	-	.	Parent=Crassostrea_gigas_newGene_10086.2
scaffold1750	StringTie	CDS	596584	596781	.	-	.	Parent=Crassostrea_gigas_newGene_10086.2
scaffold1750	StringTie	CDS	597870	597983	.	-	.	Parent=Crassostrea_gigas_newGene_10086.2
scaffold1750	StringTie	CDS	598289	598384	.	-	.	Parent=Crassostrea_gigas_newGene_10086.2
scaffold1750	StringTie	CDS	598484	598732	.	-	.	Parent=Crassostrea_gigas_newGene_10086.2
scaffold1750	StringTie	CDS	598850	598930	.	-	.	Parent=Crassostrea_gigas_newGene_10086.2
scaffold1750	StringTie	CDS	606366	606431	.	-	.	Parent=Crassostrea_gigas_newGene_10086.2
scaffold1750	StringTie	CDS	610835	610865	.	-	.	Parent=Crassostrea_gigas_newGene_10086.2
scaffold1750	StringTie	mRNA	594519	610930	.	-	.	ID=Crassostrea_gigas_newGene_10086.3;Parent=Crassostrea_gigas_newGene_10086
scaffold1750	StringTie	CDS	594519	596109	.	-	.	Parent=Crassostrea_gigas_newGene_10086.3
scaffold1750	StringTie	CDS	596243	596341	.	-	.	Parent=Crassostrea_gigas_newGene_10086.3
scaffold1750	StringTie	CDS	596584	596781	.	-	.	Parent=Crassostrea_gigas_newGene_10086.3
scaffold1750	StringTie	CDS	597870	597983	.	-	.	Parent=Crassostrea_gigas_newGene_10086.3
scaffold1750	StringTie	CDS	598289	598384	.	-	.	Parent=Crassostrea_gigas_newGene_10086.3
scaffold1750	StringTie	CDS	598484	598732	.	-	.	Parent=Crassostrea_gigas_newGene_10086.3
scaffold1750	StringTie	CDS	598850	598930	.	-	.	Parent=Crassostrea_gigas_newGene_10086.3
scaffold1750	StringTie	CDS	606366	606431	.	-	.	Parent=Crassostrea_gigas_newGene_10086.3
scaffold1750	StringTie	CDS	607550	607739	.	-	.	Parent=Crassostrea_gigas_newGene_10086.3
scaffold1750	StringTie	CDS	610835	610930	.	-	.	Parent=Crassostrea_gigas_newGene_10086.3
scaffold1751	StringTie	gene	68011	69006	.	+	.	ID=Crassostrea_gigas_newGene_10110
scaffold1751	StringTie	mRNA	68011	69006	.	+	.	ID=Crassostrea_gigas_newGene_10110.1;Parent=Crassostrea_gigas_newGene_10110
scaffold1751	StringTie	CDS	68011	68340	.	+	.	Parent=Crassostrea_gigas_newGene_10110.1
scaffold1751	StringTie	CDS	68896	69006	.	+	.	Parent=Crassostrea_gigas_newGene_10110.1
C29942	StringTie	gene	4	2634	.	+	.	ID=Crassostrea_gigas_newGene_10111
C29942	StringTie	mRNA	25	2634	.	+	.	ID=Crassostrea_gigas_newGene_10111.2;Parent=Crassostrea_gigas_newGene_10111
C29942	StringTie	CDS	25	2435	.	+	.	Parent=Crassostrea_gigas_newGene_10111.2
C29942	StringTie	CDS	2552	2634	.	+	.	Parent=Crassostrea_gigas_newGene_10111.2
scaffold1751	StringTie	gene	92859	99709	.	-	.	ID=Crassostrea_gigas_newGene_10124
scaffold1751	StringTie	mRNA	92859	99709	.	-	.	ID=Crassostrea_gigas_newGene_10124.1;Parent=Crassostrea_gigas_newGene_10124
scaffold1751	StringTie	CDS	92859	93055	.	-	.	Parent=Crassostrea_gigas_newGene_10124.1
scaffold1751	StringTie	CDS	99601	99709	.	-	.	Parent=Crassostrea_gigas_newGene_10124.1
scaffold1751	StringTie	gene	102341	107525	.	+	.	ID=Crassostrea_gigas_newGene_10125
scaffold1751	StringTie	mRNA	102341	106696	.	+	.	ID=Crassostrea_gigas_newGene_10125.1;Parent=Crassostrea_gigas_newGene_10125
scaffold1751	StringTie	CDS	102341	102368	.	+	.	Parent=Crassostrea_gigas_newGene_10125.1
scaffold1751	StringTie	CDS	102565	102682	.	+	.	Parent=Crassostrea_gigas_newGene_10125.1
scaffold1751	StringTie	CDS	106578	106696	.	+	.	Parent=Crassostrea_gigas_newGene_10125.1
scaffold1751	StringTie	mRNA	102586	107525	.	+	.	ID=Crassostrea_gigas_newGene_10125.2;Parent=Crassostrea_gigas_newGene_10125
scaffold1751	StringTie	CDS	102586	102682	.	+	.	Parent=Crassostrea_gigas_newGene_10125.2
scaffold1751	StringTie	CDS	106541	106668	.	+	.	Parent=Crassostrea_gigas_newGene_10125.2
scaffold1751	StringTie	CDS	107062	107525	.	+	.	Parent=Crassostrea_gigas_newGene_10125.2
scaffold1751	StringTie	gene	180084	184757	.	+	.	ID=Crassostrea_gigas_newGene_10132
scaffold1751	StringTie	mRNA	180084	184663	.	+	.	ID=Crassostrea_gigas_newGene_10132.1;Parent=Crassostrea_gigas_newGene_10132
scaffold1751	StringTie	CDS	180084	180638	.	+	.	Parent=Crassostrea_gigas_newGene_10132.1
scaffold1751	StringTie	CDS	184120	184663	.	+	.	Parent=Crassostrea_gigas_newGene_10132.1
scaffold1751	StringTie	mRNA	180260	184530	.	+	.	ID=Crassostrea_gigas_newGene_10132.2;Parent=Crassostrea_gigas_newGene_10132
scaffold1751	StringTie	CDS	180260	180387	.	+	.	Parent=Crassostrea_gigas_newGene_10132.2
scaffold1751	StringTie	CDS	184120	184530	.	+	.	Parent=Crassostrea_gigas_newGene_10132.2
scaffold1751	StringTie	mRNA	181396	184757	.	+	.	ID=Crassostrea_gigas_newGene_10132.3;Parent=Crassostrea_gigas_newGene_10132
scaffold1751	StringTie	CDS	181396	181889	.	+	.	Parent=Crassostrea_gigas_newGene_10132.3
scaffold1751	StringTie	CDS	184120	184757	.	+	.	Parent=Crassostrea_gigas_newGene_10132.3
scaffold1751	StringTie	mRNA	183975	184530	.	+	.	ID=Crassostrea_gigas_newGene_10132.4;Parent=Crassostrea_gigas_newGene_10132
scaffold1751	StringTie	CDS	183975	184027	.	+	.	Parent=Crassostrea_gigas_newGene_10132.4
scaffold1751	StringTie	CDS	184120	184530	.	+	.	Parent=Crassostrea_gigas_newGene_10132.4
C29950	StringTie	gene	2132	4158	.	+	.	ID=Crassostrea_gigas_newGene_10135
C29950	StringTie	mRNA	2132	4158	.	+	.	ID=Crassostrea_gigas_newGene_10135.1;Parent=Crassostrea_gigas_newGene_10135
C29950	StringTie	CDS	2132	2215	.	+	.	Parent=Crassostrea_gigas_newGene_10135.1
C29950	StringTie	CDS	2799	2946	.	+	.	Parent=Crassostrea_gigas_newGene_10135.1
C29950	StringTie	CDS	3343	4158	.	+	.	Parent=Crassostrea_gigas_newGene_10135.1
scaffold1214	StringTie	gene	328981	337530	.	+	.	ID=Crassostrea_gigas_newGene_1014
scaffold1214	StringTie	mRNA	328981	337530	.	+	.	ID=Crassostrea_gigas_newGene_1014.1;Parent=Crassostrea_gigas_newGene_1014
scaffold1214	StringTie	CDS	328981	329077	.	+	.	Parent=Crassostrea_gigas_newGene_1014.1
scaffold1214	StringTie	CDS	333437	333512	.	+	.	Parent=Crassostrea_gigas_newGene_1014.1
scaffold1214	StringTie	CDS	333970	334010	.	+	.	Parent=Crassostrea_gigas_newGene_1014.1
scaffold1214	StringTie	CDS	336896	337051	.	+	.	Parent=Crassostrea_gigas_newGene_1014.1
scaffold1214	StringTie	CDS	337306	337530	.	+	.	Parent=Crassostrea_gigas_newGene_1014.1
scaffold1753	StringTie	gene	139294	139935	.	-	.	ID=Crassostrea_gigas_newGene_10153
scaffold1753	StringTie	mRNA	139294	139935	.	-	.	ID=Crassostrea_gigas_newGene_10153.1;Parent=Crassostrea_gigas_newGene_10153
scaffold1753	StringTie	CDS	139294	139478	.	-	.	Parent=Crassostrea_gigas_newGene_10153.1
scaffold1753	StringTie	CDS	139703	139935	.	-	.	Parent=Crassostrea_gigas_newGene_10153.1
scaffold1754	StringTie	gene	70926	72428	.	-	.	ID=Crassostrea_gigas_newGene_10165
scaffold1754	StringTie	mRNA	70926	72428	.	-	.	ID=Crassostrea_gigas_newGene_10165.1;Parent=Crassostrea_gigas_newGene_10165
scaffold1754	StringTie	CDS	70926	71274	.	-	.	Parent=Crassostrea_gigas_newGene_10165.1
scaffold1754	StringTie	CDS	71789	72428	.	-	.	Parent=Crassostrea_gigas_newGene_10165.1
C29958	StringTie	gene	3	7238	.	-	.	ID=Crassostrea_gigas_newGene_10166
C29958	StringTie	mRNA	3	7238	.	-	.	ID=Crassostrea_gigas_newGene_10166.1;Parent=Crassostrea_gigas_newGene_10166
C29958	StringTie	CDS	3	2032	.	-	.	Parent=Crassostrea_gigas_newGene_10166.1
C29958	StringTie	CDS	4051	4134	.	-	.	Parent=Crassostrea_gigas_newGene_10166.1
C29958	StringTie	CDS	4479	4742	.	-	.	Parent=Crassostrea_gigas_newGene_10166.1
C29958	StringTie	CDS	4995	5108	.	-	.	Parent=Crassostrea_gigas_newGene_10166.1
C29958	StringTie	CDS	5502	5605	.	-	.	Parent=Crassostrea_gigas_newGene_10166.1
C29958	StringTie	CDS	5849	5977	.	-	.	Parent=Crassostrea_gigas_newGene_10166.1
C29958	StringTie	CDS	6230	6361	.	-	.	Parent=Crassostrea_gigas_newGene_10166.1
C29958	StringTie	CDS	6530	6643	.	-	.	Parent=Crassostrea_gigas_newGene_10166.1
C29958	StringTie	CDS	6970	7238	.	-	.	Parent=Crassostrea_gigas_newGene_10166.1
C29958	StringTie	mRNA	867	7238	.	-	.	ID=Crassostrea_gigas_newGene_10166.2;Parent=Crassostrea_gigas_newGene_10166
C29958	StringTie	CDS	867	2032	.	-	.	Parent=Crassostrea_gigas_newGene_10166.2
C29958	StringTie	CDS	4051	4134	.	-	.	Parent=Crassostrea_gigas_newGene_10166.2
C29958	StringTie	CDS	4479	4742	.	-	.	Parent=Crassostrea_gigas_newGene_10166.2
C29958	StringTie	CDS	4995	5093	.	-	.	Parent=Crassostrea_gigas_newGene_10166.2
C29958	StringTie	CDS	5502	5605	.	-	.	Parent=Crassostrea_gigas_newGene_10166.2
C29958	StringTie	CDS	5849	5977	.	-	.	Parent=Crassostrea_gigas_newGene_10166.2
C29958	StringTie	CDS	6230	6361	.	-	.	Parent=Crassostrea_gigas_newGene_10166.2
C29958	StringTie	CDS	6530	6643	.	-	.	Parent=Crassostrea_gigas_newGene_10166.2
C29958	StringTie	CDS	6970	7238	.	-	.	Parent=Crassostrea_gigas_newGene_10166.2
C29958	StringTie	mRNA	1705	7179	.	-	.	ID=Crassostrea_gigas_newGene_10166.3;Parent=Crassostrea_gigas_newGene_10166
C29958	StringTie	CDS	1705	2032	.	-	.	Parent=Crassostrea_gigas_newGene_10166.3
C29958	StringTie	CDS	2387	2470	.	-	.	Parent=Crassostrea_gigas_newGene_10166.3
C29958	StringTie	CDS	4051	4134	.	-	.	Parent=Crassostrea_gigas_newGene_10166.3
C29958	StringTie	CDS	4479	4742	.	-	.	Parent=Crassostrea_gigas_newGene_10166.3
C29958	StringTie	CDS	4995	5108	.	-	.	Parent=Crassostrea_gigas_newGene_10166.3
C29958	StringTie	CDS	5502	5605	.	-	.	Parent=Crassostrea_gigas_newGene_10166.3
C29958	StringTie	CDS	5849	5977	.	-	.	Parent=Crassostrea_gigas_newGene_10166.3
C29958	StringTie	CDS	6230	6361	.	-	.	Parent=Crassostrea_gigas_newGene_10166.3
C29958	StringTie	CDS	6530	6643	.	-	.	Parent=Crassostrea_gigas_newGene_10166.3
C29958	StringTie	CDS	6970	7179	.	-	.	Parent=Crassostrea_gigas_newGene_10166.3
C29958	StringTie	mRNA	1705	7179	.	-	.	ID=Crassostrea_gigas_newGene_10166.4;Parent=Crassostrea_gigas_newGene_10166
C29958	StringTie	CDS	1705	2032	.	-	.	Parent=Crassostrea_gigas_newGene_10166.4
C29958	StringTie	CDS	4051	4134	.	-	.	Parent=Crassostrea_gigas_newGene_10166.4
C29958	StringTie	CDS	4479	4742	.	-	.	Parent=Crassostrea_gigas_newGene_10166.4
C29958	StringTie	CDS	4995	5108	.	-	.	Parent=Crassostrea_gigas_newGene_10166.4
C29958	StringTie	CDS	5502	5605	.	-	.	Parent=Crassostrea_gigas_newGene_10166.4
C29958	StringTie	CDS	5849	5977	.	-	.	Parent=Crassostrea_gigas_newGene_10166.4
C29958	StringTie	CDS	6230	6361	.	-	.	Parent=Crassostrea_gigas_newGene_10166.4
C29958	StringTie	CDS	6530	6581	.	-	.	Parent=Crassostrea_gigas_newGene_10166.4
C29958	StringTie	CDS	6970	7179	.	-	.	Parent=Crassostrea_gigas_newGene_10166.4
C29958	StringTie	mRNA	1714	7185	.	-	.	ID=Crassostrea_gigas_newGene_10166.5;Parent=Crassostrea_gigas_newGene_10166
C29958	StringTie	CDS	1714	2032	.	-	.	Parent=Crassostrea_gigas_newGene_10166.5
C29958	StringTie	CDS	4051	4134	.	-	.	Parent=Crassostrea_gigas_newGene_10166.5
C29958	StringTie	CDS	4479	4742	.	-	.	Parent=Crassostrea_gigas_newGene_10166.5
C29958	StringTie	CDS	4995	5108	.	-	.	Parent=Crassostrea_gigas_newGene_10166.5
C29958	StringTie	CDS	5502	5605	.	-	.	Parent=Crassostrea_gigas_newGene_10166.5
C29958	StringTie	CDS	5849	5977	.	-	.	Parent=Crassostrea_gigas_newGene_10166.5
C29958	StringTie	CDS	6230	6361	.	-	.	Parent=Crassostrea_gigas_newGene_10166.5
C29958	StringTie	CDS	6530	6675	.	-	.	Parent=Crassostrea_gigas_newGene_10166.5
C29958	StringTie	CDS	7042	7185	.	-	.	Parent=Crassostrea_gigas_newGene_10166.5
C29958	StringTie	mRNA	1865	7237	.	-	.	ID=Crassostrea_gigas_newGene_10166.6;Parent=Crassostrea_gigas_newGene_10166
C29958	StringTie	CDS	1865	2032	.	-	.	Parent=Crassostrea_gigas_newGene_10166.6
C29958	StringTie	CDS	4051	4134	.	-	.	Parent=Crassostrea_gigas_newGene_10166.6
C29958	StringTie	CDS	4479	4742	.	-	.	Parent=Crassostrea_gigas_newGene_10166.6
C29958	StringTie	CDS	4995	5605	.	-	.	Parent=Crassostrea_gigas_newGene_10166.6
C29958	StringTie	CDS	5849	5977	.	-	.	Parent=Crassostrea_gigas_newGene_10166.6
C29958	StringTie	CDS	6230	6361	.	-	.	Parent=Crassostrea_gigas_newGene_10166.6
C29958	StringTie	CDS	6530	6643	.	-	.	Parent=Crassostrea_gigas_newGene_10166.6
C29958	StringTie	CDS	6970	7237	.	-	.	Parent=Crassostrea_gigas_newGene_10166.6
scaffold1754	StringTie	gene	107229	110688	.	-	.	ID=Crassostrea_gigas_newGene_10173
scaffold1754	StringTie	mRNA	107229	110688	.	-	.	ID=Crassostrea_gigas_newGene_10173.1;Parent=Crassostrea_gigas_newGene_10173
scaffold1754	StringTie	CDS	107229	109436	.	-	.	Parent=Crassostrea_gigas_newGene_10173.1
scaffold1754	StringTie	CDS	110561	110688	.	-	.	Parent=Crassostrea_gigas_newGene_10173.1
scaffold1754	StringTie	gene	154236	155180	.	-	.	ID=Crassostrea_gigas_newGene_10175
scaffold1754	StringTie	mRNA	154236	155180	.	-	.	ID=Crassostrea_gigas_newGene_10175.1;Parent=Crassostrea_gigas_newGene_10175
scaffold1754	StringTie	CDS	154236	154500	.	-	.	Parent=Crassostrea_gigas_newGene_10175.1
scaffold1754	StringTie	CDS	155082	155180	.	-	.	Parent=Crassostrea_gigas_newGene_10175.1
scaffold1754	StringTie	gene	157784	169402	.	+	.	ID=Crassostrea_gigas_newGene_10177
scaffold1754	StringTie	mRNA	157784	169402	.	+	.	ID=Crassostrea_gigas_newGene_10177.1;Parent=Crassostrea_gigas_newGene_10177
scaffold1754	StringTie	CDS	157784	157917	.	+	.	Parent=Crassostrea_gigas_newGene_10177.1
scaffold1754	StringTie	CDS	165139	165264	.	+	.	Parent=Crassostrea_gigas_newGene_10177.1
scaffold1754	StringTie	CDS	166203	166489	.	+	.	Parent=Crassostrea_gigas_newGene_10177.1
scaffold1754	StringTie	CDS	166652	166868	.	+	.	Parent=Crassostrea_gigas_newGene_10177.1
scaffold1754	StringTie	CDS	167010	167165	.	+	.	Parent=Crassostrea_gigas_newGene_10177.1
scaffold1754	StringTie	CDS	168319	169402	.	+	.	Parent=Crassostrea_gigas_newGene_10177.1
scaffold1754	StringTie	mRNA	157789	169401	.	+	.	ID=Crassostrea_gigas_newGene_10177.2;Parent=Crassostrea_gigas_newGene_10177
scaffold1754	StringTie	CDS	157789	157917	.	+	.	Parent=Crassostrea_gigas_newGene_10177.2
scaffold1754	StringTie	CDS	165139	165264	.	+	.	Parent=Crassostrea_gigas_newGene_10177.2
scaffold1754	StringTie	CDS	166203	166489	.	+	.	Parent=Crassostrea_gigas_newGene_10177.2
scaffold1754	StringTie	CDS	166652	166868	.	+	.	Parent=Crassostrea_gigas_newGene_10177.2
scaffold1754	StringTie	CDS	167010	167165	.	+	.	Parent=Crassostrea_gigas_newGene_10177.2
scaffold1754	StringTie	CDS	168319	169014	.	+	.	Parent=Crassostrea_gigas_newGene_10177.2
scaffold1754	StringTie	CDS	169057	169401	.	+	.	Parent=Crassostrea_gigas_newGene_10177.2
scaffold1754	StringTie	mRNA	159805	169402	.	+	.	ID=Crassostrea_gigas_newGene_10177.3;Parent=Crassostrea_gigas_newGene_10177
scaffold1754	StringTie	CDS	159805	160152	.	+	.	Parent=Crassostrea_gigas_newGene_10177.3
scaffold1754	StringTie	CDS	165139	165264	.	+	.	Parent=Crassostrea_gigas_newGene_10177.3
scaffold1754	StringTie	CDS	166203	166489	.	+	.	Parent=Crassostrea_gigas_newGene_10177.3
scaffold1754	StringTie	CDS	166652	166868	.	+	.	Parent=Crassostrea_gigas_newGene_10177.3
scaffold1754	StringTie	CDS	167010	167165	.	+	.	Parent=Crassostrea_gigas_newGene_10177.3
scaffold1754	StringTie	CDS	168319	169402	.	+	.	Parent=Crassostrea_gigas_newGene_10177.3
scaffold1754	StringTie	mRNA	159954	169390	.	+	.	ID=Crassostrea_gigas_newGene_10177.4;Parent=Crassostrea_gigas_newGene_10177
scaffold1754	StringTie	CDS	159954	160152	.	+	.	Parent=Crassostrea_gigas_newGene_10177.4
scaffold1754	StringTie	CDS	165139	165264	.	+	.	Parent=Crassostrea_gigas_newGene_10177.4
scaffold1754	StringTie	CDS	166203	166489	.	+	.	Parent=Crassostrea_gigas_newGene_10177.4
scaffold1754	StringTie	CDS	166652	166868	.	+	.	Parent=Crassostrea_gigas_newGene_10177.4
scaffold1754	StringTie	CDS	167010	167165	.	+	.	Parent=Crassostrea_gigas_newGene_10177.4
scaffold1754	StringTie	CDS	168319	169014	.	+	.	Parent=Crassostrea_gigas_newGene_10177.4
scaffold1754	StringTie	CDS	169057	169390	.	+	.	Parent=Crassostrea_gigas_newGene_10177.4
scaffold1754	StringTie	mRNA	161427	169402	.	+	.	ID=Crassostrea_gigas_newGene_10177.5;Parent=Crassostrea_gigas_newGene_10177
scaffold1754	StringTie	CDS	161427	161520	.	+	.	Parent=Crassostrea_gigas_newGene_10177.5
scaffold1754	StringTie	CDS	165139	165264	.	+	.	Parent=Crassostrea_gigas_newGene_10177.5
scaffold1754	StringTie	CDS	166203	166489	.	+	.	Parent=Crassostrea_gigas_newGene_10177.5
scaffold1754	StringTie	CDS	166652	166868	.	+	.	Parent=Crassostrea_gigas_newGene_10177.5
scaffold1754	StringTie	CDS	167010	167165	.	+	.	Parent=Crassostrea_gigas_newGene_10177.5
scaffold1754	StringTie	CDS	168319	169402	.	+	.	Parent=Crassostrea_gigas_newGene_10177.5
scaffold1754	StringTie	mRNA	161443	168493	.	+	.	ID=Crassostrea_gigas_newGene_10177.6;Parent=Crassostrea_gigas_newGene_10177
scaffold1754	StringTie	CDS	161443	161524	.	+	.	Parent=Crassostrea_gigas_newGene_10177.6
scaffold1754	StringTie	CDS	165139	165264	.	+	.	Parent=Crassostrea_gigas_newGene_10177.6
scaffold1754	StringTie	CDS	166203	166489	.	+	.	Parent=Crassostrea_gigas_newGene_10177.6
scaffold1754	StringTie	CDS	166652	166868	.	+	.	Parent=Crassostrea_gigas_newGene_10177.6
scaffold1754	StringTie	CDS	167010	167165	.	+	.	Parent=Crassostrea_gigas_newGene_10177.6
scaffold1754	StringTie	CDS	168319	168493	.	+	.	Parent=Crassostrea_gigas_newGene_10177.6
scaffold1754	StringTie	mRNA	163237	169402	.	+	.	ID=Crassostrea_gigas_newGene_10177.7;Parent=Crassostrea_gigas_newGene_10177
scaffold1754	StringTie	CDS	163237	163626	.	+	.	Parent=Crassostrea_gigas_newGene_10177.7
scaffold1754	StringTie	CDS	165139	165264	.	+	.	Parent=Crassostrea_gigas_newGene_10177.7
scaffold1754	StringTie	CDS	166203	166489	.	+	.	Parent=Crassostrea_gigas_newGene_10177.7
scaffold1754	StringTie	CDS	166652	166868	.	+	.	Parent=Crassostrea_gigas_newGene_10177.7
scaffold1754	StringTie	CDS	167010	167165	.	+	.	Parent=Crassostrea_gigas_newGene_10177.7
scaffold1754	StringTie	CDS	168319	169402	.	+	.	Parent=Crassostrea_gigas_newGene_10177.7
scaffold1756	StringTie	gene	4	1352	.	+	.	ID=Crassostrea_gigas_newGene_10189
scaffold1756	StringTie	mRNA	4	1352	.	+	.	ID=Crassostrea_gigas_newGene_10189.1;Parent=Crassostrea_gigas_newGene_10189
scaffold1756	StringTie	CDS	4	485	.	+	.	Parent=Crassostrea_gigas_newGene_10189.1
scaffold1756	StringTie	CDS	586	650	.	+	.	Parent=Crassostrea_gigas_newGene_10189.1
scaffold1756	StringTie	CDS	868	1352	.	+	.	Parent=Crassostrea_gigas_newGene_10189.1
scaffold1214	StringTie	gene	345688	353446	.	+	.	ID=Crassostrea_gigas_newGene_1019
scaffold1214	StringTie	mRNA	345688	353446	.	+	.	ID=Crassostrea_gigas_newGene_1019.1;Parent=Crassostrea_gigas_newGene_1019
scaffold1214	StringTie	CDS	345688	345929	.	+	.	Parent=Crassostrea_gigas_newGene_1019.1
scaffold1214	StringTie	CDS	350565	350639	.	+	.	Parent=Crassostrea_gigas_newGene_1019.1
scaffold1214	StringTie	CDS	351102	351142	.	+	.	Parent=Crassostrea_gigas_newGene_1019.1
scaffold1214	StringTie	CDS	352267	352422	.	+	.	Parent=Crassostrea_gigas_newGene_1019.1
scaffold1214	StringTie	CDS	352669	353446	.	+	.	Parent=Crassostrea_gigas_newGene_1019.1
scaffold1214	StringTie	mRNA	345806	353176	.	+	.	ID=Crassostrea_gigas_newGene_1019.2;Parent=Crassostrea_gigas_newGene_1019
scaffold1214	StringTie	CDS	345806	345929	.	+	.	Parent=Crassostrea_gigas_newGene_1019.2
scaffold1214	StringTie	CDS	350577	350639	.	+	.	Parent=Crassostrea_gigas_newGene_1019.2
scaffold1214	StringTie	CDS	351102	351142	.	+	.	Parent=Crassostrea_gigas_newGene_1019.2
scaffold1214	StringTie	CDS	352267	352422	.	+	.	Parent=Crassostrea_gigas_newGene_1019.2
scaffold1214	StringTie	CDS	352669	353176	.	+	.	Parent=Crassostrea_gigas_newGene_1019.2
scaffold1214	StringTie	mRNA	345806	352926	.	+	.	ID=Crassostrea_gigas_newGene_1019.3;Parent=Crassostrea_gigas_newGene_1019
scaffold1214	StringTie	CDS	345806	345929	.	+	.	Parent=Crassostrea_gigas_newGene_1019.3
scaffold1214	StringTie	CDS	350577	350639	.	+	.	Parent=Crassostrea_gigas_newGene_1019.3
scaffold1214	StringTie	CDS	352267	352422	.	+	.	Parent=Crassostrea_gigas_newGene_1019.3
scaffold1214	StringTie	CDS	352669	352926	.	+	.	Parent=Crassostrea_gigas_newGene_1019.3
scaffold1756	StringTie	gene	54753	55737	.	+	.	ID=Crassostrea_gigas_newGene_10195
scaffold1756	StringTie	mRNA	54753	55737	.	+	.	ID=Crassostrea_gigas_newGene_10195.1;Parent=Crassostrea_gigas_newGene_10195
scaffold1756	StringTie	CDS	54753	54980	.	+	.	Parent=Crassostrea_gigas_newGene_10195.1
scaffold1756	StringTie	CDS	55697	55737	.	+	.	Parent=Crassostrea_gigas_newGene_10195.1
scaffold1757	StringTie	gene	26413	30933	.	+	.	ID=Crassostrea_gigas_newGene_10197
scaffold1757	StringTie	mRNA	26413	30933	.	+	.	ID=Crassostrea_gigas_newGene_10197.1;Parent=Crassostrea_gigas_newGene_10197
scaffold1757	StringTie	CDS	26413	26907	.	+	.	Parent=Crassostrea_gigas_newGene_10197.1
scaffold1757	StringTie	CDS	29872	30933	.	+	.	Parent=Crassostrea_gigas_newGene_10197.1
scaffold1757	StringTie	gene	71248	73367	.	-	.	ID=Crassostrea_gigas_newGene_10202
scaffold1757	StringTie	mRNA	71248	73367	.	-	.	ID=Crassostrea_gigas_newGene_10202.1;Parent=Crassostrea_gigas_newGene_10202
scaffold1757	StringTie	CDS	71248	71307	.	-	.	Parent=Crassostrea_gigas_newGene_10202.1
scaffold1757	StringTie	CDS	71590	71711	.	-	.	Parent=Crassostrea_gigas_newGene_10202.1
scaffold1757	StringTie	CDS	71874	71951	.	-	.	Parent=Crassostrea_gigas_newGene_10202.1
scaffold1757	StringTie	CDS	72109	72222	.	-	.	Parent=Crassostrea_gigas_newGene_10202.1
scaffold1757	StringTie	CDS	72526	72648	.	-	.	Parent=Crassostrea_gigas_newGene_10202.1
scaffold1757	StringTie	CDS	73143	73209	.	-	.	Parent=Crassostrea_gigas_newGene_10202.1
scaffold1757	StringTie	CDS	73337	73367	.	-	.	Parent=Crassostrea_gigas_newGene_10202.1
scaffold1758	StringTie	gene	164553	167520	.	-	.	ID=Crassostrea_gigas_newGene_10218
scaffold1758	StringTie	mRNA	164553	167520	.	-	.	ID=Crassostrea_gigas_newGene_10218.1;Parent=Crassostrea_gigas_newGene_10218
scaffold1758	StringTie	CDS	164553	164610	.	-	.	Parent=Crassostrea_gigas_newGene_10218.1
scaffold1758	StringTie	CDS	165050	165137	.	-	.	Parent=Crassostrea_gigas_newGene_10218.1
scaffold1758	StringTie	CDS	165454	165613	.	-	.	Parent=Crassostrea_gigas_newGene_10218.1
scaffold1758	StringTie	CDS	166510	166641	.	-	.	Parent=Crassostrea_gigas_newGene_10218.1
scaffold1758	StringTie	CDS	167507	167520	.	-	.	Parent=Crassostrea_gigas_newGene_10218.1
scaffold1759	StringTie	gene	109564	110373	.	-	.	ID=Crassostrea_gigas_newGene_10239
scaffold1759	StringTie	mRNA	109564	110373	.	-	.	ID=Crassostrea_gigas_newGene_10239.1;Parent=Crassostrea_gigas_newGene_10239
scaffold1759	StringTie	CDS	109564	109655	.	-	.	Parent=Crassostrea_gigas_newGene_10239.1
scaffold1759	StringTie	CDS	109763	109977	.	-	.	Parent=Crassostrea_gigas_newGene_10239.1
scaffold1759	StringTie	CDS	110353	110373	.	-	.	Parent=Crassostrea_gigas_newGene_10239.1
scaffold1759	StringTie	gene	162631	164180	.	+	.	ID=Crassostrea_gigas_newGene_10240
scaffold1759	StringTie	mRNA	162631	164180	.	+	.	ID=Crassostrea_gigas_newGene_10240.1;Parent=Crassostrea_gigas_newGene_10240
scaffold1759	StringTie	CDS	162631	162738	.	+	.	Parent=Crassostrea_gigas_newGene_10240.1
scaffold1759	StringTie	CDS	162942	164180	.	+	.	Parent=Crassostrea_gigas_newGene_10240.1
scaffold1759	StringTie	mRNA	162670	163751	.	+	.	ID=Crassostrea_gigas_newGene_10240.2;Parent=Crassostrea_gigas_newGene_10240
scaffold1759	StringTie	CDS	162670	162744	.	+	.	Parent=Crassostrea_gigas_newGene_10240.2
scaffold1759	StringTie	CDS	162942	163751	.	+	.	Parent=Crassostrea_gigas_newGene_10240.2
scaffold1759	StringTie	gene	162942	163413	.	-	.	ID=Crassostrea_gigas_newGene_10241
scaffold1759	StringTie	mRNA	162942	163413	.	-	.	ID=Crassostrea_gigas_newGene_10241.1;Parent=Crassostrea_gigas_newGene_10241
scaffold1759	StringTie	CDS	162942	162997	.	-	.	Parent=Crassostrea_gigas_newGene_10241.1
scaffold1759	StringTie	CDS	163020	163413	.	-	.	Parent=Crassostrea_gigas_newGene_10241.1
scaffold1759	StringTie	gene	174283	182052	.	-	.	ID=Crassostrea_gigas_newGene_10243
scaffold1759	StringTie	mRNA	174283	181076	.	-	.	ID=Crassostrea_gigas_newGene_10243.1;Parent=Crassostrea_gigas_newGene_10243
scaffold1759	StringTie	CDS	174283	174761	.	-	.	Parent=Crassostrea_gigas_newGene_10243.1
scaffold1759	StringTie	CDS	176091	176669	.	-	.	Parent=Crassostrea_gigas_newGene_10243.1
scaffold1759	StringTie	CDS	180997	181076	.	-	.	Parent=Crassostrea_gigas_newGene_10243.1
scaffold1759	StringTie	mRNA	180915	182052	.	-	.	ID=Crassostrea_gigas_newGene_10243.2;Parent=Crassostrea_gigas_newGene_10243
scaffold1759	StringTie	CDS	180915	181062	.	-	.	Parent=Crassostrea_gigas_newGene_10243.2
scaffold1759	StringTie	CDS	181982	182052	.	-	.	Parent=Crassostrea_gigas_newGene_10243.2
scaffold1759	StringTie	gene	183325	185992	.	-	.	ID=Crassostrea_gigas_newGene_10244
scaffold1759	StringTie	mRNA	183325	185992	.	-	.	ID=Crassostrea_gigas_newGene_10244.1;Parent=Crassostrea_gigas_newGene_10244
scaffold1759	StringTie	CDS	183325	184869	.	-	.	Parent=Crassostrea_gigas_newGene_10244.1
scaffold1759	StringTie	CDS	185569	185992	.	-	.	Parent=Crassostrea_gigas_newGene_10244.1
scaffold1759	StringTie	gene	219602	220241	.	-	.	ID=Crassostrea_gigas_newGene_10252
scaffold1759	StringTie	mRNA	219602	220241	.	-	.	ID=Crassostrea_gigas_newGene_10252.1;Parent=Crassostrea_gigas_newGene_10252
scaffold1759	StringTie	CDS	219602	219790	.	-	.	Parent=Crassostrea_gigas_newGene_10252.1
scaffold1759	StringTie	CDS	219893	220046	.	-	.	Parent=Crassostrea_gigas_newGene_10252.1
scaffold1759	StringTie	CDS	220174	220241	.	-	.	Parent=Crassostrea_gigas_newGene_10252.1
scaffold1759	StringTie	gene	242153	243791	.	+	.	ID=Crassostrea_gigas_newGene_10253
scaffold1759	StringTie	mRNA	242153	243791	.	+	.	ID=Crassostrea_gigas_newGene_10253.1;Parent=Crassostrea_gigas_newGene_10253
scaffold1759	StringTie	CDS	242153	243153	.	+	.	Parent=Crassostrea_gigas_newGene_10253.1
scaffold1759	StringTie	CDS	243321	243791	.	+	.	Parent=Crassostrea_gigas_newGene_10253.1
scaffold1759	StringTie	gene	269264	270139	.	-	.	ID=Crassostrea_gigas_newGene_10258
scaffold1759	StringTie	mRNA	269264	270139	.	-	.	ID=Crassostrea_gigas_newGene_10258.1;Parent=Crassostrea_gigas_newGene_10258
scaffold1759	StringTie	CDS	269264	269619	.	-	.	Parent=Crassostrea_gigas_newGene_10258.1
scaffold1759	StringTie	CDS	270073	270139	.	-	.	Parent=Crassostrea_gigas_newGene_10258.1
scaffold1761	StringTie	gene	77122	84947	.	+	.	ID=Crassostrea_gigas_newGene_10285
scaffold1761	StringTie	mRNA	77122	84947	.	+	.	ID=Crassostrea_gigas_newGene_10285.1;Parent=Crassostrea_gigas_newGene_10285
scaffold1761	StringTie	CDS	77122	81571	.	+	.	Parent=Crassostrea_gigas_newGene_10285.1
scaffold1761	StringTie	CDS	81810	81941	.	+	.	Parent=Crassostrea_gigas_newGene_10285.1
scaffold1761	StringTie	CDS	82911	83036	.	+	.	Parent=Crassostrea_gigas_newGene_10285.1
scaffold1761	StringTie	CDS	84188	84947	.	+	.	Parent=Crassostrea_gigas_newGene_10285.1
scaffold1761	StringTie	mRNA	79721	84543	.	+	.	ID=Crassostrea_gigas_newGene_10285.2;Parent=Crassostrea_gigas_newGene_10285
scaffold1761	StringTie	CDS	79721	81941	.	+	.	Parent=Crassostrea_gigas_newGene_10285.2
scaffold1761	StringTie	CDS	82911	83036	.	+	.	Parent=Crassostrea_gigas_newGene_10285.2
scaffold1761	StringTie	CDS	84188	84543	.	+	.	Parent=Crassostrea_gigas_newGene_10285.2
scaffold1761	StringTie	mRNA	79731	81797	.	+	.	ID=Crassostrea_gigas_newGene_10285.3;Parent=Crassostrea_gigas_newGene_10285
scaffold1761	StringTie	CDS	79731	79856	.	+	.	Parent=Crassostrea_gigas_newGene_10285.3
scaffold1761	StringTie	CDS	81050	81797	.	+	.	Parent=Crassostrea_gigas_newGene_10285.3
scaffold1761	StringTie	mRNA	79731	83042	.	+	.	ID=Crassostrea_gigas_newGene_10285.4;Parent=Crassostrea_gigas_newGene_10285
scaffold1761	StringTie	CDS	79731	79856	.	+	.	Parent=Crassostrea_gigas_newGene_10285.4
scaffold1761	StringTie	CDS	81449	81571	.	+	.	Parent=Crassostrea_gigas_newGene_10285.4
scaffold1761	StringTie	CDS	81891	81941	.	+	.	Parent=Crassostrea_gigas_newGene_10285.4
scaffold1761	StringTie	CDS	82911	83042	.	+	.	Parent=Crassostrea_gigas_newGene_10285.4
scaffold1761	StringTie	mRNA	79731	81797	.	+	.	ID=Crassostrea_gigas_newGene_10285.5;Parent=Crassostrea_gigas_newGene_10285
scaffold1761	StringTie	CDS	79731	79856	.	+	.	Parent=Crassostrea_gigas_newGene_10285.5
scaffold1761	StringTie	CDS	81050	81081	.	+	.	Parent=Crassostrea_gigas_newGene_10285.5
scaffold1761	StringTie	CDS	81449	81797	.	+	.	Parent=Crassostrea_gigas_newGene_10285.5
scaffold1761	StringTie	mRNA	79750	84943	.	+	.	ID=Crassostrea_gigas_newGene_10285.6;Parent=Crassostrea_gigas_newGene_10285
scaffold1761	StringTie	CDS	79750	81345	.	+	.	Parent=Crassostrea_gigas_newGene_10285.6
scaffold1761	StringTie	CDS	81449	81571	.	+	.	Parent=Crassostrea_gigas_newGene_10285.6
scaffold1761	StringTie	CDS	81810	81941	.	+	.	Parent=Crassostrea_gigas_newGene_10285.6
scaffold1761	StringTie	CDS	82911	83036	.	+	.	Parent=Crassostrea_gigas_newGene_10285.6
scaffold1761	StringTie	CDS	84188	84943	.	+	.	Parent=Crassostrea_gigas_newGene_10285.6
scaffold1217	StringTie	gene	392	2702	.	+	.	ID=Crassostrea_gigas_newGene_1029
scaffold1217	StringTie	mRNA	392	2702	.	+	.	ID=Crassostrea_gigas_newGene_1029.1;Parent=Crassostrea_gigas_newGene_1029
scaffold1217	StringTie	CDS	392	1023	.	+	.	Parent=Crassostrea_gigas_newGene_1029.1
scaffold1217	StringTie	CDS	1882	2702	.	+	.	Parent=Crassostrea_gigas_newGene_1029.1
scaffold1763	StringTie	gene	132397	134946	.	-	.	ID=Crassostrea_gigas_newGene_10300
scaffold1763	StringTie	mRNA	132397	134946	.	-	.	ID=Crassostrea_gigas_newGene_10300.1;Parent=Crassostrea_gigas_newGene_10300
scaffold1763	StringTie	CDS	132397	133381	.	-	.	Parent=Crassostrea_gigas_newGene_10300.1
scaffold1763	StringTie	CDS	133449	134946	.	-	.	Parent=Crassostrea_gigas_newGene_10300.1
scaffold1763	StringTie	gene	247827	249024	.	+	.	ID=Crassostrea_gigas_newGene_10303
scaffold1763	StringTie	mRNA	247827	249024	.	+	.	ID=Crassostrea_gigas_newGene_10303.1;Parent=Crassostrea_gigas_newGene_10303
scaffold1763	StringTie	CDS	247827	247869	.	+	.	Parent=Crassostrea_gigas_newGene_10303.1
scaffold1763	StringTie	CDS	248719	249024	.	+	.	Parent=Crassostrea_gigas_newGene_10303.1
scaffold1217	StringTie	gene	34780	42432	.	+	.	ID=Crassostrea_gigas_newGene_1031
scaffold1217	StringTie	mRNA	34780	41532	.	+	.	ID=Crassostrea_gigas_newGene_1031.1;Parent=Crassostrea_gigas_newGene_1031
scaffold1217	StringTie	CDS	34780	35111	.	+	.	Parent=Crassostrea_gigas_newGene_1031.1
scaffold1217	StringTie	CDS	37802	37993	.	+	.	Parent=Crassostrea_gigas_newGene_1031.1
scaffold1217	StringTie	CDS	40565	41532	.	+	.	Parent=Crassostrea_gigas_newGene_1031.1
scaffold1217	StringTie	mRNA	34842	42410	.	+	.	ID=Crassostrea_gigas_newGene_1031.2;Parent=Crassostrea_gigas_newGene_1031
scaffold1217	StringTie	CDS	34842	35111	.	+	.	Parent=Crassostrea_gigas_newGene_1031.2
scaffold1217	StringTie	CDS	37802	37978	.	+	.	Parent=Crassostrea_gigas_newGene_1031.2
scaffold1217	StringTie	CDS	38369	38471	.	+	.	Parent=Crassostrea_gigas_newGene_1031.2
scaffold1217	StringTie	CDS	40565	42410	.	+	.	Parent=Crassostrea_gigas_newGene_1031.2
scaffold1217	StringTie	mRNA	36929	42420	.	+	.	ID=Crassostrea_gigas_newGene_1031.3;Parent=Crassostrea_gigas_newGene_1031
scaffold1217	StringTie	CDS	36929	38471	.	+	.	Parent=Crassostrea_gigas_newGene_1031.3
scaffold1217	StringTie	CDS	40565	42420	.	+	.	Parent=Crassostrea_gigas_newGene_1031.3
scaffold1217	StringTie	mRNA	36929	42387	.	+	.	ID=Crassostrea_gigas_newGene_1031.4;Parent=Crassostrea_gigas_newGene_1031
scaffold1217	StringTie	CDS	36929	37993	.	+	.	Parent=Crassostrea_gigas_newGene_1031.4
scaffold1217	StringTie	CDS	38369	38471	.	+	.	Parent=Crassostrea_gigas_newGene_1031.4
scaffold1217	StringTie	CDS	40565	42387	.	+	.	Parent=Crassostrea_gigas_newGene_1031.4
scaffold1217	StringTie	mRNA	37455	42432	.	+	.	ID=Crassostrea_gigas_newGene_1031.5;Parent=Crassostrea_gigas_newGene_1031
scaffold1217	StringTie	CDS	37455	37532	.	+	.	Parent=Crassostrea_gigas_newGene_1031.5
scaffold1217	StringTie	CDS	37802	37993	.	+	.	Parent=Crassostrea_gigas_newGene_1031.5
scaffold1217	StringTie	CDS	38369	38471	.	+	.	Parent=Crassostrea_gigas_newGene_1031.5
scaffold1217	StringTie	CDS	40565	42432	.	+	.	Parent=Crassostrea_gigas_newGene_1031.5
C29988	StringTie	gene	17	760	.	-	.	ID=Crassostrea_gigas_newGene_10311
C29988	StringTie	mRNA	17	760	.	-	.	ID=Crassostrea_gigas_newGene_10311.1;Parent=Crassostrea_gigas_newGene_10311
C29988	StringTie	CDS	17	390	.	-	.	Parent=Crassostrea_gigas_newGene_10311.1
C29988	StringTie	CDS	529	760	.	-	.	Parent=Crassostrea_gigas_newGene_10311.1
scaffold1764	StringTie	gene	31	1253	.	-	.	ID=Crassostrea_gigas_newGene_10316
scaffold1764	StringTie	mRNA	31	1253	.	-	.	ID=Crassostrea_gigas_newGene_10316.1;Parent=Crassostrea_gigas_newGene_10316
scaffold1764	StringTie	CDS	31	381	.	-	.	Parent=Crassostrea_gigas_newGene_10316.1
scaffold1764	StringTie	CDS	523	674	.	-	.	Parent=Crassostrea_gigas_newGene_10316.1
scaffold1764	StringTie	CDS	780	1253	.	-	.	Parent=Crassostrea_gigas_newGene_10316.1
scaffold1764	StringTie	gene	18461	19728	.	-	.	ID=Crassostrea_gigas_newGene_10324
scaffold1764	StringTie	mRNA	18461	19728	.	-	.	ID=Crassostrea_gigas_newGene_10324.1;Parent=Crassostrea_gigas_newGene_10324
scaffold1764	StringTie	CDS	18461	19558	.	-	.	Parent=Crassostrea_gigas_newGene_10324.1
scaffold1764	StringTie	CDS	19650	19728	.	-	.	Parent=Crassostrea_gigas_newGene_10324.1
scaffold1766	StringTie	gene	99412	107806	.	-	.	ID=Crassostrea_gigas_newGene_10330
scaffold1766	StringTie	mRNA	99412	107806	.	-	.	ID=Crassostrea_gigas_newGene_10330.1;Parent=Crassostrea_gigas_newGene_10330
scaffold1766	StringTie	CDS	99412	99468	.	-	.	Parent=Crassostrea_gigas_newGene_10330.1
scaffold1766	StringTie	CDS	106295	107806	.	-	.	Parent=Crassostrea_gigas_newGene_10330.1
scaffold1766	StringTie	gene	97746	99540	.	-	.	ID=Crassostrea_gigas_newGene_10332
scaffold1766	StringTie	mRNA	97746	99540	.	-	.	ID=Crassostrea_gigas_newGene_10332.1;Parent=Crassostrea_gigas_newGene_10332
scaffold1766	StringTie	CDS	97746	97913	.	-	.	Parent=Crassostrea_gigas_newGene_10332.1
scaffold1766	StringTie	CDS	99469	99540	.	-	.	Parent=Crassostrea_gigas_newGene_10332.1
scaffold1767	StringTie	gene	123800	129184	.	+	.	ID=Crassostrea_gigas_newGene_10338
scaffold1767	StringTie	mRNA	123800	129136	.	+	.	ID=Crassostrea_gigas_newGene_10338.1;Parent=Crassostrea_gigas_newGene_10338
scaffold1767	StringTie	CDS	123800	123880	.	+	.	Parent=Crassostrea_gigas_newGene_10338.1
scaffold1767	StringTie	CDS	125956	126078	.	+	.	Parent=Crassostrea_gigas_newGene_10338.1
scaffold1767	StringTie	CDS	129059	129136	.	+	.	Parent=Crassostrea_gigas_newGene_10338.1
scaffold1767	StringTie	mRNA	125622	129184	.	+	.	ID=Crassostrea_gigas_newGene_10338.2;Parent=Crassostrea_gigas_newGene_10338
scaffold1767	StringTie	CDS	125622	125672	.	+	.	Parent=Crassostrea_gigas_newGene_10338.2
scaffold1767	StringTie	CDS	125956	126078	.	+	.	Parent=Crassostrea_gigas_newGene_10338.2
scaffold1767	StringTie	CDS	129059	129184	.	+	.	Parent=Crassostrea_gigas_newGene_10338.2
scaffold1767	StringTie	gene	356974	357996	.	-	.	ID=Crassostrea_gigas_newGene_10344
scaffold1767	StringTie	mRNA	356974	357996	.	-	.	ID=Crassostrea_gigas_newGene_10344.1;Parent=Crassostrea_gigas_newGene_10344
scaffold1767	StringTie	CDS	356974	357119	.	-	.	Parent=Crassostrea_gigas_newGene_10344.1
scaffold1767	StringTie	CDS	357790	357996	.	-	.	Parent=Crassostrea_gigas_newGene_10344.1
scaffold1768	StringTie	gene	20876	23713	.	+	.	ID=Crassostrea_gigas_newGene_10355
scaffold1768	StringTie	mRNA	20876	23713	.	+	.	ID=Crassostrea_gigas_newGene_10355.1;Parent=Crassostrea_gigas_newGene_10355
scaffold1768	StringTie	CDS	20876	20950	.	+	.	Parent=Crassostrea_gigas_newGene_10355.1
scaffold1768	StringTie	CDS	21515	21558	.	+	.	Parent=Crassostrea_gigas_newGene_10355.1
scaffold1768	StringTie	CDS	22263	22340	.	+	.	Parent=Crassostrea_gigas_newGene_10355.1
scaffold1768	StringTie	CDS	23393	23470	.	+	.	Parent=Crassostrea_gigas_newGene_10355.1
scaffold1768	StringTie	CDS	23588	23713	.	+	.	Parent=Crassostrea_gigas_newGene_10355.1
scaffold1768	StringTie	mRNA	20934	23713	.	+	.	ID=Crassostrea_gigas_newGene_10355.2;Parent=Crassostrea_gigas_newGene_10355
scaffold1768	StringTie	CDS	20934	20973	.	+	.	Parent=Crassostrea_gigas_newGene_10355.2
scaffold1768	StringTie	CDS	21515	21558	.	+	.	Parent=Crassostrea_gigas_newGene_10355.2
scaffold1768	StringTie	CDS	22263	22340	.	+	.	Parent=Crassostrea_gigas_newGene_10355.2
scaffold1768	StringTie	CDS	23393	23470	.	+	.	Parent=Crassostrea_gigas_newGene_10355.2
scaffold1768	StringTie	CDS	23588	23713	.	+	.	Parent=Crassostrea_gigas_newGene_10355.2
scaffold1768	StringTie	mRNA	21078	23713	.	+	.	ID=Crassostrea_gigas_newGene_10355.3;Parent=Crassostrea_gigas_newGene_10355
scaffold1768	StringTie	CDS	21078	21131	.	+	.	Parent=Crassostrea_gigas_newGene_10355.3
scaffold1768	StringTie	CDS	21515	21558	.	+	.	Parent=Crassostrea_gigas_newGene_10355.3
scaffold1768	StringTie	CDS	22263	22340	.	+	.	Parent=Crassostrea_gigas_newGene_10355.3
scaffold1768	StringTie	CDS	23393	23470	.	+	.	Parent=Crassostrea_gigas_newGene_10355.3
scaffold1768	StringTie	CDS	23588	23713	.	+	.	Parent=Crassostrea_gigas_newGene_10355.3
scaffold1769	StringTie	gene	4287	5523	.	-	.	ID=Crassostrea_gigas_newGene_10357
scaffold1769	StringTie	mRNA	4287	5523	.	-	.	ID=Crassostrea_gigas_newGene_10357.1;Parent=Crassostrea_gigas_newGene_10357
scaffold1769	StringTie	CDS	4287	4671	.	-	.	Parent=Crassostrea_gigas_newGene_10357.1
scaffold1769	StringTie	CDS	5436	5523	.	-	.	Parent=Crassostrea_gigas_newGene_10357.1
scaffold1769	StringTie	gene	138993	141475	.	-	.	ID=Crassostrea_gigas_newGene_10367
scaffold1769	StringTie	mRNA	138993	141475	.	-	.	ID=Crassostrea_gigas_newGene_10367.1;Parent=Crassostrea_gigas_newGene_10367
scaffold1769	StringTie	CDS	138993	139859	.	-	.	Parent=Crassostrea_gigas_newGene_10367.1
scaffold1769	StringTie	CDS	141133	141475	.	-	.	Parent=Crassostrea_gigas_newGene_10367.1
scaffold177	StringTie	gene	32492	35235	.	+	.	ID=Crassostrea_gigas_newGene_10377
scaffold177	StringTie	mRNA	32492	35235	.	+	.	ID=Crassostrea_gigas_newGene_10377.1;Parent=Crassostrea_gigas_newGene_10377
scaffold177	StringTie	CDS	32492	33274	.	+	.	Parent=Crassostrea_gigas_newGene_10377.1
scaffold177	StringTie	CDS	33417	35235	.	+	.	Parent=Crassostrea_gigas_newGene_10377.1
scaffold177	StringTie	gene	43012	46401	.	-	.	ID=Crassostrea_gigas_newGene_10379
scaffold177	StringTie	mRNA	43012	46401	.	-	.	ID=Crassostrea_gigas_newGene_10379.1;Parent=Crassostrea_gigas_newGene_10379
scaffold177	StringTie	CDS	43012	43557	.	-	.	Parent=Crassostrea_gigas_newGene_10379.1
scaffold177	StringTie	CDS	44358	46401	.	-	.	Parent=Crassostrea_gigas_newGene_10379.1
scaffold177	StringTie	mRNA	43013	46397	.	-	.	ID=Crassostrea_gigas_newGene_10379.2;Parent=Crassostrea_gigas_newGene_10379
scaffold177	StringTie	CDS	43013	43191	.	-	.	Parent=Crassostrea_gigas_newGene_10379.2
scaffold177	StringTie	CDS	43992	46397	.	-	.	Parent=Crassostrea_gigas_newGene_10379.2
scaffold177	StringTie	gene	43012	46401	.	+	.	ID=Crassostrea_gigas_newGene_10380
scaffold177	StringTie	mRNA	43012	46401	.	+	.	ID=Crassostrea_gigas_newGene_10380.1;Parent=Crassostrea_gigas_newGene_10380
scaffold177	StringTie	CDS	43012	43514	.	+	.	Parent=Crassostrea_gigas_newGene_10380.1
scaffold177	StringTie	CDS	44315	46401	.	+	.	Parent=Crassostrea_gigas_newGene_10380.1
scaffold177	StringTie	mRNA	43012	46397	.	+	.	ID=Crassostrea_gigas_newGene_10380.2;Parent=Crassostrea_gigas_newGene_10380
scaffold177	StringTie	CDS	43012	43100	.	+	.	Parent=Crassostrea_gigas_newGene_10380.2
scaffold177	StringTie	CDS	43901	46397	.	+	.	Parent=Crassostrea_gigas_newGene_10380.2
scaffold177	StringTie	gene	50731	54541	.	-	.	ID=Crassostrea_gigas_newGene_10381
scaffold177	StringTie	mRNA	50731	54239	.	-	.	ID=Crassostrea_gigas_newGene_10381.1;Parent=Crassostrea_gigas_newGene_10381
scaffold177	StringTie	CDS	50731	51938	.	-	.	Parent=Crassostrea_gigas_newGene_10381.1
scaffold177	StringTie	CDS	52950	54239	.	-	.	Parent=Crassostrea_gigas_newGene_10381.1
scaffold177	StringTie	mRNA	50731	54541	.	-	.	ID=Crassostrea_gigas_newGene_10381.2;Parent=Crassostrea_gigas_newGene_10381
scaffold177	StringTie	CDS	50731	51831	.	-	.	Parent=Crassostrea_gigas_newGene_10381.2
scaffold177	StringTie	CDS	52843	54541	.	-	.	Parent=Crassostrea_gigas_newGene_10381.2
scaffold177	StringTie	mRNA	50968	53411	.	-	.	ID=Crassostrea_gigas_newGene_10381.3;Parent=Crassostrea_gigas_newGene_10381
scaffold177	StringTie	CDS	50968	52159	.	-	.	Parent=Crassostrea_gigas_newGene_10381.3
scaffold177	StringTie	CDS	53140	53411	.	-	.	Parent=Crassostrea_gigas_newGene_10381.3
scaffold177	StringTie	gene	50731	54541	.	+	.	ID=Crassostrea_gigas_newGene_10382
scaffold177	StringTie	mRNA	50731	54541	.	+	.	ID=Crassostrea_gigas_newGene_10382.1;Parent=Crassostrea_gigas_newGene_10382
scaffold177	StringTie	CDS	50731	52042	.	+	.	Parent=Crassostrea_gigas_newGene_10382.1
scaffold177	StringTie	CDS	53054	54541	.	+	.	Parent=Crassostrea_gigas_newGene_10382.1
scaffold177	StringTie	mRNA	50968	54056	.	+	.	ID=Crassostrea_gigas_newGene_10382.2;Parent=Crassostrea_gigas_newGene_10382
scaffold177	StringTie	CDS	50968	52303	.	+	.	Parent=Crassostrea_gigas_newGene_10382.2
scaffold177	StringTie	CDS	53315	54056	.	+	.	Parent=Crassostrea_gigas_newGene_10382.2
scaffold177	StringTie	gene	74999	101223	.	+	.	ID=Crassostrea_gigas_newGene_10384
scaffold177	StringTie	mRNA	74999	101223	.	+	.	ID=Crassostrea_gigas_newGene_10384.1;Parent=Crassostrea_gigas_newGene_10384
scaffold177	StringTie	CDS	74999	75045	.	+	.	Parent=Crassostrea_gigas_newGene_10384.1
scaffold177	StringTie	CDS	96211	96340	.	+	.	Parent=Crassostrea_gigas_newGene_10384.1
scaffold177	StringTie	CDS	96575	96711	.	+	.	Parent=Crassostrea_gigas_newGene_10384.1
scaffold177	StringTie	CDS	98962	101223	.	+	.	Parent=Crassostrea_gigas_newGene_10384.1
scaffold177	StringTie	mRNA	85164	100063	.	+	.	ID=Crassostrea_gigas_newGene_10384.2;Parent=Crassostrea_gigas_newGene_10384
scaffold177	StringTie	CDS	85164	85281	.	+	.	Parent=Crassostrea_gigas_newGene_10384.2
scaffold177	StringTie	CDS	93701	93864	.	+	.	Parent=Crassostrea_gigas_newGene_10384.2
scaffold177	StringTie	CDS	93947	94048	.	+	.	Parent=Crassostrea_gigas_newGene_10384.2
scaffold177	StringTie	CDS	94149	94244	.	+	.	Parent=Crassostrea_gigas_newGene_10384.2
scaffold177	StringTie	CDS	96211	96340	.	+	.	Parent=Crassostrea_gigas_newGene_10384.2
scaffold177	StringTie	CDS	96575	96711	.	+	.	Parent=Crassostrea_gigas_newGene_10384.2
scaffold177	StringTie	CDS	98962	100063	.	+	.	Parent=Crassostrea_gigas_newGene_10384.2
scaffold177	StringTie	mRNA	85221	98427	.	+	.	ID=Crassostrea_gigas_newGene_10384.3;Parent=Crassostrea_gigas_newGene_10384
scaffold177	StringTie	CDS	85221	85281	.	+	.	Parent=Crassostrea_gigas_newGene_10384.3
scaffold177	StringTie	CDS	93713	93864	.	+	.	Parent=Crassostrea_gigas_newGene_10384.3
scaffold177	StringTie	CDS	94149	94244	.	+	.	Parent=Crassostrea_gigas_newGene_10384.3
scaffold177	StringTie	CDS	94533	95324	.	+	.	Parent=Crassostrea_gigas_newGene_10384.3
scaffold177	StringTie	CDS	96211	96340	.	+	.	Parent=Crassostrea_gigas_newGene_10384.3
scaffold177	StringTie	CDS	96575	98427	.	+	.	Parent=Crassostrea_gigas_newGene_10384.3
scaffold177	StringTie	mRNA	85221	98427	.	+	.	ID=Crassostrea_gigas_newGene_10384.4;Parent=Crassostrea_gigas_newGene_10384
scaffold177	StringTie	CDS	85221	85281	.	+	.	Parent=Crassostrea_gigas_newGene_10384.4
scaffold177	StringTie	CDS	93701	93864	.	+	.	Parent=Crassostrea_gigas_newGene_10384.4
scaffold177	StringTie	CDS	94149	94244	.	+	.	Parent=Crassostrea_gigas_newGene_10384.4
scaffold177	StringTie	CDS	94533	95324	.	+	.	Parent=Crassostrea_gigas_newGene_10384.4
scaffold177	StringTie	CDS	96211	96340	.	+	.	Parent=Crassostrea_gigas_newGene_10384.4
scaffold177	StringTie	CDS	96575	98427	.	+	.	Parent=Crassostrea_gigas_newGene_10384.4
scaffold177	StringTie	mRNA	85225	99166	.	+	.	ID=Crassostrea_gigas_newGene_10384.5;Parent=Crassostrea_gigas_newGene_10384
scaffold177	StringTie	CDS	85225	85281	.	+	.	Parent=Crassostrea_gigas_newGene_10384.5
scaffold177	StringTie	CDS	93701	93864	.	+	.	Parent=Crassostrea_gigas_newGene_10384.5
scaffold177	StringTie	CDS	94149	94244	.	+	.	Parent=Crassostrea_gigas_newGene_10384.5
scaffold177	StringTie	CDS	96211	96340	.	+	.	Parent=Crassostrea_gigas_newGene_10384.5
scaffold177	StringTie	CDS	96575	96711	.	+	.	Parent=Crassostrea_gigas_newGene_10384.5
scaffold177	StringTie	CDS	98962	99166	.	+	.	Parent=Crassostrea_gigas_newGene_10384.5
scaffold177	StringTie	mRNA	85247	99156	.	+	.	ID=Crassostrea_gigas_newGene_10384.6;Parent=Crassostrea_gigas_newGene_10384
scaffold177	StringTie	CDS	85247	85281	.	+	.	Parent=Crassostrea_gigas_newGene_10384.6
scaffold177	StringTie	CDS	93701	93864	.	+	.	Parent=Crassostrea_gigas_newGene_10384.6
scaffold177	StringTie	CDS	93947	94048	.	+	.	Parent=Crassostrea_gigas_newGene_10384.6
scaffold177	StringTie	CDS	94149	94244	.	+	.	Parent=Crassostrea_gigas_newGene_10384.6
scaffold177	StringTie	CDS	96211	96344	.	+	.	Parent=Crassostrea_gigas_newGene_10384.6
scaffold177	StringTie	CDS	96575	96711	.	+	.	Parent=Crassostrea_gigas_newGene_10384.6
scaffold177	StringTie	CDS	98070	99156	.	+	.	Parent=Crassostrea_gigas_newGene_10384.6
scaffold177	StringTie	mRNA	96069	100087	.	+	.	ID=Crassostrea_gigas_newGene_10384.7;Parent=Crassostrea_gigas_newGene_10384
scaffold177	StringTie	CDS	96069	96340	.	+	.	Parent=Crassostrea_gigas_newGene_10384.7
scaffold177	StringTie	CDS	96575	96711	.	+	.	Parent=Crassostrea_gigas_newGene_10384.7
scaffold177	StringTie	CDS	98070	100087	.	+	.	Parent=Crassostrea_gigas_newGene_10384.7
scaffold177	StringTie	gene	80218	82723	.	+	.	ID=Crassostrea_gigas_newGene_10385
scaffold177	StringTie	mRNA	80218	82723	.	+	.	ID=Crassostrea_gigas_newGene_10385.1;Parent=Crassostrea_gigas_newGene_10385
scaffold177	StringTie	CDS	80218	80706	.	+	.	Parent=Crassostrea_gigas_newGene_10385.1
scaffold177	StringTie	CDS	80957	82723	.	+	.	Parent=Crassostrea_gigas_newGene_10385.1
scaffold177	StringTie	gene	98875	122521	.	-	.	ID=Crassostrea_gigas_newGene_10386
scaffold177	StringTie	mRNA	98875	122521	.	-	.	ID=Crassostrea_gigas_newGene_10386.1;Parent=Crassostrea_gigas_newGene_10386
scaffold177	StringTie	CDS	98875	99520	.	-	.	Parent=Crassostrea_gigas_newGene_10386.1
scaffold177	StringTie	CDS	122463	122521	.	-	.	Parent=Crassostrea_gigas_newGene_10386.1
scaffold177	StringTie	gene	120850	122474	.	+	.	ID=Crassostrea_gigas_newGene_10387
scaffold177	StringTie	mRNA	120850	122474	.	+	.	ID=Crassostrea_gigas_newGene_10387.1;Parent=Crassostrea_gigas_newGene_10387
scaffold177	StringTie	CDS	120850	120952	.	+	.	Parent=Crassostrea_gigas_newGene_10387.1
scaffold177	StringTie	CDS	121199	121621	.	+	.	Parent=Crassostrea_gigas_newGene_10387.1
scaffold177	StringTie	CDS	121892	122474	.	+	.	Parent=Crassostrea_gigas_newGene_10387.1
scaffold177	StringTie	gene	125436	128308	.	-	.	ID=Crassostrea_gigas_newGene_10388
scaffold177	StringTie	mRNA	125436	128308	.	-	.	ID=Crassostrea_gigas_newGene_10388.1;Parent=Crassostrea_gigas_newGene_10388
scaffold177	StringTie	CDS	125436	126863	.	-	.	Parent=Crassostrea_gigas_newGene_10388.1
scaffold177	StringTie	CDS	127419	127508	.	-	.	Parent=Crassostrea_gigas_newGene_10388.1
scaffold177	StringTie	CDS	128273	128308	.	-	.	Parent=Crassostrea_gigas_newGene_10388.1
scaffold177	StringTie	gene	153614	155767	.	-	.	ID=Crassostrea_gigas_newGene_10391
scaffold177	StringTie	mRNA	153614	155767	.	-	.	ID=Crassostrea_gigas_newGene_10391.1;Parent=Crassostrea_gigas_newGene_10391
scaffold177	StringTie	CDS	153614	155473	.	-	.	Parent=Crassostrea_gigas_newGene_10391.1
scaffold177	StringTie	CDS	155734	155767	.	-	.	Parent=Crassostrea_gigas_newGene_10391.1
scaffold177	StringTie	mRNA	153805	155474	.	-	.	ID=Crassostrea_gigas_newGene_10391.2;Parent=Crassostrea_gigas_newGene_10391
scaffold177	StringTie	CDS	153805	154704	.	-	.	Parent=Crassostrea_gigas_newGene_10391.2
scaffold177	StringTie	CDS	154788	155474	.	-	.	Parent=Crassostrea_gigas_newGene_10391.2
scaffold177	StringTie	gene	180417	181799	.	+	.	ID=Crassostrea_gigas_newGene_10395
scaffold177	StringTie	mRNA	180417	181799	.	+	.	ID=Crassostrea_gigas_newGene_10395.1;Parent=Crassostrea_gigas_newGene_10395
scaffold177	StringTie	CDS	180417	180778	.	+	.	Parent=Crassostrea_gigas_newGene_10395.1
scaffold177	StringTie	CDS	181098	181799	.	+	.	Parent=Crassostrea_gigas_newGene_10395.1
scaffold177	StringTie	gene	205617	207500	.	-	.	ID=Crassostrea_gigas_newGene_10399
scaffold177	StringTie	mRNA	205617	207500	.	-	.	ID=Crassostrea_gigas_newGene_10399.1;Parent=Crassostrea_gigas_newGene_10399
scaffold177	StringTie	CDS	205617	205685	.	-	.	Parent=Crassostrea_gigas_newGene_10399.1
scaffold177	StringTie	CDS	206457	206591	.	-	.	Parent=Crassostrea_gigas_newGene_10399.1
scaffold177	StringTie	CDS	207394	207500	.	-	.	Parent=Crassostrea_gigas_newGene_10399.1
scaffold1217	StringTie	gene	119184	123080	.	-	.	ID=Crassostrea_gigas_newGene_1040
scaffold1217	StringTie	mRNA	119184	123080	.	-	.	ID=Crassostrea_gigas_newGene_1040.1;Parent=Crassostrea_gigas_newGene_1040
scaffold1217	StringTie	CDS	119184	119949	.	-	.	Parent=Crassostrea_gigas_newGene_1040.1
scaffold1217	StringTie	CDS	120600	120667	.	-	.	Parent=Crassostrea_gigas_newGene_1040.1
scaffold1217	StringTie	CDS	122241	122372	.	-	.	Parent=Crassostrea_gigas_newGene_1040.1
scaffold1217	StringTie	CDS	122852	123080	.	-	.	Parent=Crassostrea_gigas_newGene_1040.1
scaffold1217	StringTie	mRNA	119669	123057	.	-	.	ID=Crassostrea_gigas_newGene_1040.2;Parent=Crassostrea_gigas_newGene_1040
scaffold1217	StringTie	CDS	119669	119949	.	-	.	Parent=Crassostrea_gigas_newGene_1040.2
scaffold1217	StringTie	CDS	120600	120667	.	-	.	Parent=Crassostrea_gigas_newGene_1040.2
scaffold1217	StringTie	CDS	122241	122368	.	-	.	Parent=Crassostrea_gigas_newGene_1040.2
scaffold1217	StringTie	CDS	122852	123057	.	-	.	Parent=Crassostrea_gigas_newGene_1040.2
scaffold177	StringTie	gene	352457	363342	.	+	.	ID=Crassostrea_gigas_newGene_10412
scaffold177	StringTie	mRNA	352457	363338	.	+	.	ID=Crassostrea_gigas_newGene_10412.1;Parent=Crassostrea_gigas_newGene_10412
scaffold177	StringTie	CDS	352457	352580	.	+	.	Parent=Crassostrea_gigas_newGene_10412.1
scaffold177	StringTie	CDS	352948	353076	.	+	.	Parent=Crassostrea_gigas_newGene_10412.1
scaffold177	StringTie	CDS	355045	355173	.	+	.	Parent=Crassostrea_gigas_newGene_10412.1
scaffold177	StringTie	CDS	355558	355689	.	+	.	Parent=Crassostrea_gigas_newGene_10412.1
scaffold177	StringTie	CDS	357288	357416	.	+	.	Parent=Crassostrea_gigas_newGene_10412.1
scaffold177	StringTie	CDS	363198	363338	.	+	.	Parent=Crassostrea_gigas_newGene_10412.1
scaffold177	StringTie	mRNA	353048	363329	.	+	.	ID=Crassostrea_gigas_newGene_10412.2;Parent=Crassostrea_gigas_newGene_10412
scaffold177	StringTie	CDS	353048	353076	.	+	.	Parent=Crassostrea_gigas_newGene_10412.2
scaffold177	StringTie	CDS	355045	355173	.	+	.	Parent=Crassostrea_gigas_newGene_10412.2
scaffold177	StringTie	CDS	355558	355689	.	+	.	Parent=Crassostrea_gigas_newGene_10412.2
scaffold177	StringTie	CDS	357288	357416	.	+	.	Parent=Crassostrea_gigas_newGene_10412.2
scaffold177	StringTie	CDS	361720	361848	.	+	.	Parent=Crassostrea_gigas_newGene_10412.2
scaffold177	StringTie	CDS	363198	363329	.	+	.	Parent=Crassostrea_gigas_newGene_10412.2
scaffold177	StringTie	mRNA	355154	363342	.	+	.	ID=Crassostrea_gigas_newGene_10412.3;Parent=Crassostrea_gigas_newGene_10412
scaffold177	StringTie	CDS	355154	355173	.	+	.	Parent=Crassostrea_gigas_newGene_10412.3
scaffold177	StringTie	CDS	355558	355689	.	+	.	Parent=Crassostrea_gigas_newGene_10412.3
scaffold177	StringTie	CDS	357288	357405	.	+	.	Parent=Crassostrea_gigas_newGene_10412.3
scaffold177	StringTie	CDS	361838	361848	.	+	.	Parent=Crassostrea_gigas_newGene_10412.3
scaffold177	StringTie	CDS	363198	363342	.	+	.	Parent=Crassostrea_gigas_newGene_10412.3
scaffold177	StringTie	mRNA	358979	363329	.	+	.	ID=Crassostrea_gigas_newGene_10412.4;Parent=Crassostrea_gigas_newGene_10412
scaffold177	StringTie	CDS	358979	359121	.	+	.	Parent=Crassostrea_gigas_newGene_10412.4
scaffold177	StringTie	CDS	361720	361848	.	+	.	Parent=Crassostrea_gigas_newGene_10412.4
scaffold177	StringTie	CDS	363198	363329	.	+	.	Parent=Crassostrea_gigas_newGene_10412.4
scaffold177	StringTie	gene	373828	377725	.	+	.	ID=Crassostrea_gigas_newGene_10415
scaffold177	StringTie	mRNA	373828	377725	.	+	.	ID=Crassostrea_gigas_newGene_10415.1;Parent=Crassostrea_gigas_newGene_10415
scaffold177	StringTie	CDS	373828	373858	.	+	.	Parent=Crassostrea_gigas_newGene_10415.1
scaffold177	StringTie	CDS	374105	374167	.	+	.	Parent=Crassostrea_gigas_newGene_10415.1
scaffold177	StringTie	CDS	374751	374871	.	+	.	Parent=Crassostrea_gigas_newGene_10415.1
scaffold177	StringTie	CDS	376343	377075	.	+	.	Parent=Crassostrea_gigas_newGene_10415.1
scaffold177	StringTie	CDS	377392	377469	.	+	.	Parent=Crassostrea_gigas_newGene_10415.1
scaffold177	StringTie	CDS	377615	377725	.	+	.	Parent=Crassostrea_gigas_newGene_10415.1
scaffold177	StringTie	mRNA	374117	376994	.	+	.	ID=Crassostrea_gigas_newGene_10415.2;Parent=Crassostrea_gigas_newGene_10415
scaffold177	StringTie	CDS	374117	374167	.	+	.	Parent=Crassostrea_gigas_newGene_10415.2
scaffold177	StringTie	CDS	376343	376994	.	+	.	Parent=Crassostrea_gigas_newGene_10415.2
scaffold177	StringTie	gene	452401	455664	.	+	.	ID=Crassostrea_gigas_newGene_10421
scaffold177	StringTie	mRNA	452401	455664	.	+	.	ID=Crassostrea_gigas_newGene_10421.1;Parent=Crassostrea_gigas_newGene_10421
scaffold177	StringTie	CDS	452401	452576	.	+	.	Parent=Crassostrea_gigas_newGene_10421.1
scaffold177	StringTie	CDS	452979	455664	.	+	.	Parent=Crassostrea_gigas_newGene_10421.1
scaffold177	StringTie	gene	453916	456514	.	-	.	ID=Crassostrea_gigas_newGene_10422
scaffold177	StringTie	mRNA	453916	456514	.	-	.	ID=Crassostrea_gigas_newGene_10422.1;Parent=Crassostrea_gigas_newGene_10422
scaffold177	StringTie	CDS	453916	455258	.	-	.	Parent=Crassostrea_gigas_newGene_10422.1
scaffold177	StringTie	CDS	455435	455664	.	-	.	Parent=Crassostrea_gigas_newGene_10422.1
scaffold177	StringTie	CDS	456225	456292	.	-	.	Parent=Crassostrea_gigas_newGene_10422.1
scaffold177	StringTie	CDS	456473	456514	.	-	.	Parent=Crassostrea_gigas_newGene_10422.1
scaffold1770	StringTie	gene	6487	11388	.	-	.	ID=Crassostrea_gigas_newGene_10426
scaffold1770	StringTie	mRNA	6487	11026	.	-	.	ID=Crassostrea_gigas_newGene_10426.1;Parent=Crassostrea_gigas_newGene_10426
scaffold1770	StringTie	CDS	6487	7657	.	-	.	Parent=Crassostrea_gigas_newGene_10426.1
scaffold1770	StringTie	CDS	8364	8456	.	-	.	Parent=Crassostrea_gigas_newGene_10426.1
scaffold1770	StringTie	CDS	9311	9436	.	-	.	Parent=Crassostrea_gigas_newGene_10426.1
scaffold1770	StringTie	CDS	10572	10672	.	-	.	Parent=Crassostrea_gigas_newGene_10426.1
scaffold1770	StringTie	CDS	10938	11026	.	-	.	Parent=Crassostrea_gigas_newGene_10426.1
scaffold1770	StringTie	mRNA	6487	11388	.	-	.	ID=Crassostrea_gigas_newGene_10426.2;Parent=Crassostrea_gigas_newGene_10426
scaffold1770	StringTie	CDS	6487	7726	.	-	.	Parent=Crassostrea_gigas_newGene_10426.2
scaffold1770	StringTie	CDS	8364	8456	.	-	.	Parent=Crassostrea_gigas_newGene_10426.2
scaffold1770	StringTie	CDS	9311	9436	.	-	.	Parent=Crassostrea_gigas_newGene_10426.2
scaffold1770	StringTie	CDS	10572	10672	.	-	.	Parent=Crassostrea_gigas_newGene_10426.2
scaffold1770	StringTie	CDS	10938	11024	.	-	.	Parent=Crassostrea_gigas_newGene_10426.2
scaffold1770	StringTie	CDS	11350	11388	.	-	.	Parent=Crassostrea_gigas_newGene_10426.2
scaffold1770	StringTie	mRNA	7487	11026	.	-	.	ID=Crassostrea_gigas_newGene_10426.3;Parent=Crassostrea_gigas_newGene_10426
scaffold1770	StringTie	CDS	7487	7657	.	-	.	Parent=Crassostrea_gigas_newGene_10426.3
scaffold1770	StringTie	CDS	9311	9436	.	-	.	Parent=Crassostrea_gigas_newGene_10426.3
scaffold1770	StringTie	CDS	10572	10672	.	-	.	Parent=Crassostrea_gigas_newGene_10426.3
scaffold1770	StringTie	CDS	10938	11026	.	-	.	Parent=Crassostrea_gigas_newGene_10426.3
scaffold1770	StringTie	gene	15141	18109	.	-	.	ID=Crassostrea_gigas_newGene_10427
scaffold1770	StringTie	mRNA	15141	18109	.	-	.	ID=Crassostrea_gigas_newGene_10427.1;Parent=Crassostrea_gigas_newGene_10427
scaffold1770	StringTie	CDS	15141	15203	.	-	.	Parent=Crassostrea_gigas_newGene_10427.1
scaffold1770	StringTie	CDS	17444	17661	.	-	.	Parent=Crassostrea_gigas_newGene_10427.1
scaffold1770	StringTie	CDS	17908	18109	.	-	.	Parent=Crassostrea_gigas_newGene_10427.1
scaffold1771	StringTie	gene	7202	8535	.	+	.	ID=Crassostrea_gigas_newGene_10434
scaffold1771	StringTie	mRNA	7202	8535	.	+	.	ID=Crassostrea_gigas_newGene_10434.1;Parent=Crassostrea_gigas_newGene_10434
scaffold1771	StringTie	CDS	7202	7254	.	+	.	Parent=Crassostrea_gigas_newGene_10434.1
scaffold1771	StringTie	CDS	8158	8535	.	+	.	Parent=Crassostrea_gigas_newGene_10434.1
scaffold1772	StringTie	gene	43057	43965	.	+	.	ID=Crassostrea_gigas_newGene_10442
scaffold1772	StringTie	mRNA	43164	43727	.	+	.	ID=Crassostrea_gigas_newGene_10442.3;Parent=Crassostrea_gigas_newGene_10442
scaffold1772	StringTie	CDS	43164	43252	.	+	.	Parent=Crassostrea_gigas_newGene_10442.3
scaffold1772	StringTie	CDS	43400	43727	.	+	.	Parent=Crassostrea_gigas_newGene_10442.3
scaffold1772	StringTie	gene	119981	124281	.	+	.	ID=Crassostrea_gigas_newGene_10449
scaffold1772	StringTie	mRNA	119981	124281	.	+	.	ID=Crassostrea_gigas_newGene_10449.1;Parent=Crassostrea_gigas_newGene_10449
scaffold1772	StringTie	CDS	119981	120183	.	+	.	Parent=Crassostrea_gigas_newGene_10449.1
scaffold1772	StringTie	CDS	120877	120932	.	+	.	Parent=Crassostrea_gigas_newGene_10449.1
scaffold1772	StringTie	CDS	121442	121579	.	+	.	Parent=Crassostrea_gigas_newGene_10449.1
scaffold1772	StringTie	CDS	122772	124281	.	+	.	Parent=Crassostrea_gigas_newGene_10449.1
scaffold1772	StringTie	gene	121958	122552	.	+	.	ID=Crassostrea_gigas_newGene_10450
scaffold1772	StringTie	mRNA	121958	122552	.	+	.	ID=Crassostrea_gigas_newGene_10450.1;Parent=Crassostrea_gigas_newGene_10450
scaffold1772	StringTie	CDS	121958	122166	.	+	.	Parent=Crassostrea_gigas_newGene_10450.1
scaffold1772	StringTie	CDS	122346	122552	.	+	.	Parent=Crassostrea_gigas_newGene_10450.1
scaffold1772	StringTie	gene	128626	130299	.	-	.	ID=Crassostrea_gigas_newGene_10451
scaffold1772	StringTie	mRNA	128626	130299	.	-	.	ID=Crassostrea_gigas_newGene_10451.1;Parent=Crassostrea_gigas_newGene_10451
scaffold1772	StringTie	CDS	128626	128691	.	-	.	Parent=Crassostrea_gigas_newGene_10451.1
scaffold1772	StringTie	CDS	129003	129101	.	-	.	Parent=Crassostrea_gigas_newGene_10451.1
scaffold1772	StringTie	CDS	129371	129542	.	-	.	Parent=Crassostrea_gigas_newGene_10451.1
scaffold1772	StringTie	CDS	129808	130299	.	-	.	Parent=Crassostrea_gigas_newGene_10451.1
scaffold1772	StringTie	gene	172618	174869	.	-	.	ID=Crassostrea_gigas_newGene_10460
scaffold1772	StringTie	mRNA	172618	174869	.	-	.	ID=Crassostrea_gigas_newGene_10460.1;Parent=Crassostrea_gigas_newGene_10460
scaffold1772	StringTie	CDS	172618	172734	.	-	.	Parent=Crassostrea_gigas_newGene_10460.1
scaffold1772	StringTie	CDS	172898	172992	.	-	.	Parent=Crassostrea_gigas_newGene_10460.1
scaffold1772	StringTie	CDS	173177	173241	.	-	.	Parent=Crassostrea_gigas_newGene_10460.1
scaffold1772	StringTie	CDS	173423	174869	.	-	.	Parent=Crassostrea_gigas_newGene_10460.1
scaffold1772	StringTie	mRNA	172960	174868	.	-	.	ID=Crassostrea_gigas_newGene_10460.2;Parent=Crassostrea_gigas_newGene_10460
scaffold1772	StringTie	CDS	172960	172992	.	-	.	Parent=Crassostrea_gigas_newGene_10460.2
scaffold1772	StringTie	CDS	173177	173241	.	-	.	Parent=Crassostrea_gigas_newGene_10460.2
scaffold1772	StringTie	CDS	173423	173689	.	-	.	Parent=Crassostrea_gigas_newGene_10460.2
scaffold1772	StringTie	CDS	174230	174868	.	-	.	Parent=Crassostrea_gigas_newGene_10460.2
C30084	StringTie	gene	460	3271	.	+	.	ID=Crassostrea_gigas_newGene_10467
C30084	StringTie	mRNA	460	3271	.	+	.	ID=Crassostrea_gigas_newGene_10467.1;Parent=Crassostrea_gigas_newGene_10467
C30084	StringTie	CDS	460	604	.	+	.	Parent=Crassostrea_gigas_newGene_10467.1
C30084	StringTie	CDS	2919	3271	.	+	.	Parent=Crassostrea_gigas_newGene_10467.1
scaffold1772	StringTie	gene	366514	367613	.	+	.	ID=Crassostrea_gigas_newGene_10475
scaffold1772	StringTie	mRNA	366514	367613	.	+	.	ID=Crassostrea_gigas_newGene_10475.2;Parent=Crassostrea_gigas_newGene_10475
scaffold1772	StringTie	CDS	366514	367192	.	+	.	Parent=Crassostrea_gigas_newGene_10475.2
scaffold1772	StringTie	CDS	367243	367613	.	+	.	Parent=Crassostrea_gigas_newGene_10475.2
scaffold1772	StringTie	gene	366540	369818	.	-	.	ID=Crassostrea_gigas_newGene_10477
scaffold1772	StringTie	mRNA	366540	369818	.	-	.	ID=Crassostrea_gigas_newGene_10477.1;Parent=Crassostrea_gigas_newGene_10477
scaffold1772	StringTie	CDS	366540	367117	.	-	.	Parent=Crassostrea_gigas_newGene_10477.1
scaffold1772	StringTie	CDS	367168	367361	.	-	.	Parent=Crassostrea_gigas_newGene_10477.1
scaffold1772	StringTie	CDS	369786	369818	.	-	.	Parent=Crassostrea_gigas_newGene_10477.1
scaffold1772	StringTie	gene	382404	382852	.	+	.	ID=Crassostrea_gigas_newGene_10479
scaffold1772	StringTie	mRNA	382404	382852	.	+	.	ID=Crassostrea_gigas_newGene_10479.1;Parent=Crassostrea_gigas_newGene_10479
scaffold1772	StringTie	CDS	382404	382537	.	+	.	Parent=Crassostrea_gigas_newGene_10479.1
scaffold1772	StringTie	CDS	382710	382852	.	+	.	Parent=Crassostrea_gigas_newGene_10479.1
scaffold1773	StringTie	gene	645	8510	.	-	.	ID=Crassostrea_gigas_newGene_10482
scaffold1773	StringTie	mRNA	645	8510	.	-	.	ID=Crassostrea_gigas_newGene_10482.1;Parent=Crassostrea_gigas_newGene_10482
scaffold1773	StringTie	CDS	645	1360	.	-	.	Parent=Crassostrea_gigas_newGene_10482.1
scaffold1773	StringTie	CDS	2151	2287	.	-	.	Parent=Crassostrea_gigas_newGene_10482.1
scaffold1773	StringTie	CDS	2684	2866	.	-	.	Parent=Crassostrea_gigas_newGene_10482.1
scaffold1773	StringTie	CDS	3898	4011	.	-	.	Parent=Crassostrea_gigas_newGene_10482.1
scaffold1773	StringTie	CDS	4717	4862	.	-	.	Parent=Crassostrea_gigas_newGene_10482.1
scaffold1773	StringTie	CDS	5435	5556	.	-	.	Parent=Crassostrea_gigas_newGene_10482.1
scaffold1773	StringTie	CDS	5959	6108	.	-	.	Parent=Crassostrea_gigas_newGene_10482.1
scaffold1773	StringTie	CDS	6220	6274	.	-	.	Parent=Crassostrea_gigas_newGene_10482.1
scaffold1773	StringTie	CDS	8311	8510	.	-	.	Parent=Crassostrea_gigas_newGene_10482.1
scaffold1773	StringTie	gene	12787	16052	.	-	.	ID=Crassostrea_gigas_newGene_10484
scaffold1773	StringTie	mRNA	12787	16052	.	-	.	ID=Crassostrea_gigas_newGene_10484.1;Parent=Crassostrea_gigas_newGene_10484
scaffold1773	StringTie	CDS	12787	14656	.	-	.	Parent=Crassostrea_gigas_newGene_10484.1
scaffold1773	StringTie	CDS	15520	16052	.	-	.	Parent=Crassostrea_gigas_newGene_10484.1
C30100	StringTie	gene	877	3841	.	-	.	ID=Crassostrea_gigas_newGene_10493
C30100	StringTie	mRNA	877	3841	.	-	.	ID=Crassostrea_gigas_newGene_10493.1;Parent=Crassostrea_gigas_newGene_10493
C30100	StringTie	CDS	877	1120	.	-	.	Parent=Crassostrea_gigas_newGene_10493.1
C30100	StringTie	CDS	3770	3841	.	-	.	Parent=Crassostrea_gigas_newGene_10493.1
scaffold1164	StringTie	gene	1	1770	.	-	.	ID=Crassostrea_gigas_newGene_105
scaffold1164	StringTie	mRNA	1	1770	.	-	.	ID=Crassostrea_gigas_newGene_105.1;Parent=Crassostrea_gigas_newGene_105
scaffold1164	StringTie	CDS	1	70	.	-	.	Parent=Crassostrea_gigas_newGene_105.1
scaffold1164	StringTie	CDS	961	1770	.	-	.	Parent=Crassostrea_gigas_newGene_105.1
scaffold1773	StringTie	gene	215973	220251	.	-	.	ID=Crassostrea_gigas_newGene_10517
scaffold1773	StringTie	mRNA	215973	220234	.	-	.	ID=Crassostrea_gigas_newGene_10517.1;Parent=Crassostrea_gigas_newGene_10517
scaffold1773	StringTie	CDS	215973	217934	.	-	.	Parent=Crassostrea_gigas_newGene_10517.1
scaffold1773	StringTie	CDS	219480	219579	.	-	.	Parent=Crassostrea_gigas_newGene_10517.1
scaffold1773	StringTie	CDS	219984	220234	.	-	.	Parent=Crassostrea_gigas_newGene_10517.1
scaffold1773	StringTie	mRNA	216990	219313	.	-	.	ID=Crassostrea_gigas_newGene_10517.2;Parent=Crassostrea_gigas_newGene_10517
scaffold1773	StringTie	CDS	216990	218147	.	-	.	Parent=Crassostrea_gigas_newGene_10517.2
scaffold1773	StringTie	CDS	218440	219313	.	-	.	Parent=Crassostrea_gigas_newGene_10517.2
C30110	StringTie	gene	5910	7426	.	-	.	ID=Crassostrea_gigas_newGene_10519
C30110	StringTie	mRNA	6540	7362	.	-	.	ID=Crassostrea_gigas_newGene_10519.2;Parent=Crassostrea_gigas_newGene_10519
C30110	StringTie	CDS	6540	6820	.	-	.	Parent=Crassostrea_gigas_newGene_10519.2
C30110	StringTie	CDS	6906	7362	.	-	.	Parent=Crassostrea_gigas_newGene_10519.2
C30110	StringTie	mRNA	6585	7424	.	-	.	ID=Crassostrea_gigas_newGene_10519.3;Parent=Crassostrea_gigas_newGene_10519
C30110	StringTie	CDS	6585	6990	.	-	.	Parent=Crassostrea_gigas_newGene_10519.3
C30110	StringTie	CDS	7076	7424	.	-	.	Parent=Crassostrea_gigas_newGene_10519.3
scaffold1773	StringTie	gene	250831	253947	.	+	.	ID=Crassostrea_gigas_newGene_10525
scaffold1773	StringTie	mRNA	250831	253947	.	+	.	ID=Crassostrea_gigas_newGene_10525.1;Parent=Crassostrea_gigas_newGene_10525
scaffold1773	StringTie	CDS	250831	252460	.	+	.	Parent=Crassostrea_gigas_newGene_10525.1
scaffold1773	StringTie	CDS	253008	253203	.	+	.	Parent=Crassostrea_gigas_newGene_10525.1
scaffold1773	StringTie	CDS	253753	253947	.	+	.	Parent=Crassostrea_gigas_newGene_10525.1
C30120	StringTie	gene	1706	3157	.	+	.	ID=Crassostrea_gigas_newGene_10537
C30120	StringTie	mRNA	1706	3157	.	+	.	ID=Crassostrea_gigas_newGene_10537.1;Parent=Crassostrea_gigas_newGene_10537
C30120	StringTie	CDS	1706	1923	.	+	.	Parent=Crassostrea_gigas_newGene_10537.1
C30120	StringTie	CDS	2024	2110	.	+	.	Parent=Crassostrea_gigas_newGene_10537.1
C30120	StringTie	CDS	2395	3157	.	+	.	Parent=Crassostrea_gigas_newGene_10537.1
scaffold1777	StringTie	gene	53629	56739	.	+	.	ID=Crassostrea_gigas_newGene_10540
scaffold1777	StringTie	mRNA	53629	56739	.	+	.	ID=Crassostrea_gigas_newGene_10540.1;Parent=Crassostrea_gigas_newGene_10540
scaffold1777	StringTie	CDS	53629	53693	.	+	.	Parent=Crassostrea_gigas_newGene_10540.1
scaffold1777	StringTie	CDS	54590	56739	.	+	.	Parent=Crassostrea_gigas_newGene_10540.1
C30124	StringTie	gene	115	7397	.	-	.	ID=Crassostrea_gigas_newGene_10550
C30124	StringTie	mRNA	115	6154	.	-	.	ID=Crassostrea_gigas_newGene_10550.1;Parent=Crassostrea_gigas_newGene_10550
C30124	StringTie	CDS	115	1486	.	-	.	Parent=Crassostrea_gigas_newGene_10550.1
C30124	StringTie	CDS	3879	3961	.	-	.	Parent=Crassostrea_gigas_newGene_10550.1
C30124	StringTie	CDS	4446	6154	.	-	.	Parent=Crassostrea_gigas_newGene_10550.1
C30124	StringTie	mRNA	315	7397	.	-	.	ID=Crassostrea_gigas_newGene_10550.2;Parent=Crassostrea_gigas_newGene_10550
C30124	StringTie	CDS	315	932	.	-	.	Parent=Crassostrea_gigas_newGene_10550.2
C30124	StringTie	CDS	1318	1486	.	-	.	Parent=Crassostrea_gigas_newGene_10550.2
C30124	StringTie	CDS	3879	7397	.	-	.	Parent=Crassostrea_gigas_newGene_10550.2
C30124	StringTie	mRNA	315	4321	.	-	.	ID=Crassostrea_gigas_newGene_10550.3;Parent=Crassostrea_gigas_newGene_10550
C30124	StringTie	CDS	315	932	.	-	.	Parent=Crassostrea_gigas_newGene_10550.3
C30124	StringTie	CDS	1368	1486	.	-	.	Parent=Crassostrea_gigas_newGene_10550.3
C30124	StringTie	CDS	3879	4321	.	-	.	Parent=Crassostrea_gigas_newGene_10550.3
C30124	StringTie	mRNA	1901	4355	.	-	.	ID=Crassostrea_gigas_newGene_10550.4;Parent=Crassostrea_gigas_newGene_10550
C30124	StringTie	CDS	1901	2016	.	-	.	Parent=Crassostrea_gigas_newGene_10550.4
C30124	StringTie	CDS	2183	4355	.	-	.	Parent=Crassostrea_gigas_newGene_10550.4
scaffold178	StringTie	gene	26215	27249	.	+	.	ID=Crassostrea_gigas_newGene_10555
scaffold178	StringTie	mRNA	26215	27249	.	+	.	ID=Crassostrea_gigas_newGene_10555.2;Parent=Crassostrea_gigas_newGene_10555
scaffold178	StringTie	CDS	26215	26247	.	+	.	Parent=Crassostrea_gigas_newGene_10555.2
scaffold178	StringTie	CDS	26500	27249	.	+	.	Parent=Crassostrea_gigas_newGene_10555.2
scaffold1780	StringTie	gene	4615	10148	.	+	.	ID=Crassostrea_gigas_newGene_10562
scaffold1780	StringTie	mRNA	4615	10148	.	+	.	ID=Crassostrea_gigas_newGene_10562.1;Parent=Crassostrea_gigas_newGene_10562
scaffold1780	StringTie	CDS	4615	4798	.	+	.	Parent=Crassostrea_gigas_newGene_10562.1
scaffold1780	StringTie	CDS	5616	5762	.	+	.	Parent=Crassostrea_gigas_newGene_10562.1
scaffold1780	StringTie	CDS	8916	9051	.	+	.	Parent=Crassostrea_gigas_newGene_10562.1
scaffold1780	StringTie	CDS	9874	10148	.	+	.	Parent=Crassostrea_gigas_newGene_10562.1
scaffold1780	StringTie	gene	39241	43891	.	+	.	ID=Crassostrea_gigas_newGene_10569
scaffold1780	StringTie	mRNA	39241	43891	.	+	.	ID=Crassostrea_gigas_newGene_10569.1;Parent=Crassostrea_gigas_newGene_10569
scaffold1780	StringTie	CDS	39241	39370	.	+	.	Parent=Crassostrea_gigas_newGene_10569.1
scaffold1780	StringTie	CDS	40359	40485	.	+	.	Parent=Crassostrea_gigas_newGene_10569.1
scaffold1780	StringTie	CDS	40718	40871	.	+	.	Parent=Crassostrea_gigas_newGene_10569.1
scaffold1780	StringTie	CDS	41554	41623	.	+	.	Parent=Crassostrea_gigas_newGene_10569.1
scaffold1780	StringTie	CDS	42139	42202	.	+	.	Parent=Crassostrea_gigas_newGene_10569.1
scaffold1780	StringTie	CDS	42523	42608	.	+	.	Parent=Crassostrea_gigas_newGene_10569.1
scaffold1780	StringTie	CDS	43225	43345	.	+	.	Parent=Crassostrea_gigas_newGene_10569.1
scaffold1780	StringTie	CDS	43506	43547	.	+	.	Parent=Crassostrea_gigas_newGene_10569.1
scaffold1780	StringTie	CDS	43642	43891	.	+	.	Parent=Crassostrea_gigas_newGene_10569.1
scaffold1780	StringTie	gene	129595	131483	.	-	.	ID=Crassostrea_gigas_newGene_10577
scaffold1780	StringTie	mRNA	130105	131482	.	-	.	ID=Crassostrea_gigas_newGene_10577.2;Parent=Crassostrea_gigas_newGene_10577
scaffold1780	StringTie	CDS	130105	130168	.	-	.	Parent=Crassostrea_gigas_newGene_10577.2
scaffold1780	StringTie	CDS	130638	131482	.	-	.	Parent=Crassostrea_gigas_newGene_10577.2
scaffold1780	StringTie	gene	284328	289326	.	-	.	ID=Crassostrea_gigas_newGene_10583
scaffold1780	StringTie	mRNA	284328	289326	.	-	.	ID=Crassostrea_gigas_newGene_10583.1;Parent=Crassostrea_gigas_newGene_10583
scaffold1780	StringTie	CDS	284328	287270	.	-	.	Parent=Crassostrea_gigas_newGene_10583.1
scaffold1780	StringTie	CDS	287632	289326	.	-	.	Parent=Crassostrea_gigas_newGene_10583.1
scaffold1780	StringTie	mRNA	284328	289326	.	-	.	ID=Crassostrea_gigas_newGene_10583.2;Parent=Crassostrea_gigas_newGene_10583
scaffold1780	StringTie	CDS	284328	287270	.	-	.	Parent=Crassostrea_gigas_newGene_10583.2
scaffold1780	StringTie	CDS	287632	287697	.	-	.	Parent=Crassostrea_gigas_newGene_10583.2
scaffold1780	StringTie	CDS	287731	289326	.	-	.	Parent=Crassostrea_gigas_newGene_10583.2
scaffold1780	StringTie	gene	330520	331540	.	+	.	ID=Crassostrea_gigas_newGene_10585
scaffold1780	StringTie	mRNA	330520	331540	.	+	.	ID=Crassostrea_gigas_newGene_10585.1;Parent=Crassostrea_gigas_newGene_10585
scaffold1780	StringTie	CDS	330520	330772	.	+	.	Parent=Crassostrea_gigas_newGene_10585.1
scaffold1780	StringTie	CDS	331405	331540	.	+	.	Parent=Crassostrea_gigas_newGene_10585.1
C30144	StringTie	gene	86	1582	.	+	.	ID=Crassostrea_gigas_newGene_10589
C30144	StringTie	mRNA	86	1582	.	+	.	ID=Crassostrea_gigas_newGene_10589.1;Parent=Crassostrea_gigas_newGene_10589
C30144	StringTie	CDS	86	279	.	+	.	Parent=Crassostrea_gigas_newGene_10589.1
C30144	StringTie	CDS	648	1582	.	+	.	Parent=Crassostrea_gigas_newGene_10589.1
scaffold1219	StringTie	gene	10937	13829	.	+	.	ID=Crassostrea_gigas_newGene_1059
scaffold1219	StringTie	mRNA	10937	13829	.	+	.	ID=Crassostrea_gigas_newGene_1059.1;Parent=Crassostrea_gigas_newGene_1059
scaffold1219	StringTie	CDS	10937	12556	.	+	.	Parent=Crassostrea_gigas_newGene_1059.1
scaffold1219	StringTie	CDS	13326	13829	.	+	.	Parent=Crassostrea_gigas_newGene_1059.1
scaffold1219	StringTie	mRNA	10937	13829	.	+	.	ID=Crassostrea_gigas_newGene_1059.2;Parent=Crassostrea_gigas_newGene_1059
scaffold1219	StringTie	CDS	10937	12389	.	+	.	Parent=Crassostrea_gigas_newGene_1059.2
scaffold1219	StringTie	CDS	13159	13829	.	+	.	Parent=Crassostrea_gigas_newGene_1059.2
scaffold1219	StringTie	gene	10937	13795	.	-	.	ID=Crassostrea_gigas_newGene_1060
scaffold1219	StringTie	mRNA	10937	13795	.	-	.	ID=Crassostrea_gigas_newGene_1060.1;Parent=Crassostrea_gigas_newGene_1060
scaffold1219	StringTie	CDS	10937	12972	.	-	.	Parent=Crassostrea_gigas_newGene_1060.1
scaffold1219	StringTie	CDS	13742	13795	.	-	.	Parent=Crassostrea_gigas_newGene_1060.1
scaffold1219	StringTie	mRNA	10937	13795	.	-	.	ID=Crassostrea_gigas_newGene_1060.2;Parent=Crassostrea_gigas_newGene_1060
scaffold1219	StringTie	CDS	10937	12807	.	-	.	Parent=Crassostrea_gigas_newGene_1060.2
scaffold1219	StringTie	CDS	12833	13795	.	-	.	Parent=Crassostrea_gigas_newGene_1060.2
scaffold1219	StringTie	mRNA	10937	13795	.	-	.	ID=Crassostrea_gigas_newGene_1060.3;Parent=Crassostrea_gigas_newGene_1060
scaffold1219	StringTie	CDS	10937	12807	.	-	.	Parent=Crassostrea_gigas_newGene_1060.3
scaffold1219	StringTie	CDS	12833	13576	.	-	.	Parent=Crassostrea_gigas_newGene_1060.3
scaffold1219	StringTie	CDS	13602	13795	.	-	.	Parent=Crassostrea_gigas_newGene_1060.3
scaffold1219	StringTie	mRNA	10943	13794	.	-	.	ID=Crassostrea_gigas_newGene_1060.4;Parent=Crassostrea_gigas_newGene_1060
scaffold1219	StringTie	CDS	10943	12710	.	-	.	Parent=Crassostrea_gigas_newGene_1060.4
scaffold1219	StringTie	CDS	13494	13794	.	-	.	Parent=Crassostrea_gigas_newGene_1060.4
scaffold1219	StringTie	mRNA	10943	13794	.	-	.	ID=Crassostrea_gigas_newGene_1060.5;Parent=Crassostrea_gigas_newGene_1060
scaffold1219	StringTie	CDS	10943	13576	.	-	.	Parent=Crassostrea_gigas_newGene_1060.5
scaffold1219	StringTie	CDS	13602	13794	.	-	.	Parent=Crassostrea_gigas_newGene_1060.5
scaffold1782	StringTie	gene	85506	88501	.	+	.	ID=Crassostrea_gigas_newGene_10601
scaffold1782	StringTie	mRNA	85506	88501	.	+	.	ID=Crassostrea_gigas_newGene_10601.1;Parent=Crassostrea_gigas_newGene_10601
scaffold1782	StringTie	CDS	85506	86201	.	+	.	Parent=Crassostrea_gigas_newGene_10601.1
scaffold1782	StringTie	CDS	86692	86807	.	+	.	Parent=Crassostrea_gigas_newGene_10601.1
scaffold1782	StringTie	CDS	87477	87635	.	+	.	Parent=Crassostrea_gigas_newGene_10601.1
scaffold1782	StringTie	CDS	87773	87928	.	+	.	Parent=Crassostrea_gigas_newGene_10601.1
scaffold1782	StringTie	CDS	88123	88501	.	+	.	Parent=Crassostrea_gigas_newGene_10601.1
scaffold1782	StringTie	mRNA	85506	88501	.	+	.	ID=Crassostrea_gigas_newGene_10601.2;Parent=Crassostrea_gigas_newGene_10601
scaffold1782	StringTie	CDS	85506	86201	.	+	.	Parent=Crassostrea_gigas_newGene_10601.2
scaffold1782	StringTie	CDS	86692	86807	.	+	.	Parent=Crassostrea_gigas_newGene_10601.2
scaffold1782	StringTie	CDS	87477	87635	.	+	.	Parent=Crassostrea_gigas_newGene_10601.2
scaffold1782	StringTie	CDS	87773	87958	.	+	.	Parent=Crassostrea_gigas_newGene_10601.2
scaffold1782	StringTie	CDS	88123	88501	.	+	.	Parent=Crassostrea_gigas_newGene_10601.2
scaffold1782	StringTie	mRNA	86692	88365	.	+	.	ID=Crassostrea_gigas_newGene_10601.3;Parent=Crassostrea_gigas_newGene_10601
scaffold1782	StringTie	CDS	86692	86807	.	+	.	Parent=Crassostrea_gigas_newGene_10601.3
scaffold1782	StringTie	CDS	87480	87635	.	+	.	Parent=Crassostrea_gigas_newGene_10601.3
scaffold1782	StringTie	CDS	87773	87928	.	+	.	Parent=Crassostrea_gigas_newGene_10601.3
scaffold1782	StringTie	CDS	88123	88365	.	+	.	Parent=Crassostrea_gigas_newGene_10601.3
scaffold1782	StringTie	mRNA	87400	88501	.	+	.	ID=Crassostrea_gigas_newGene_10601.4;Parent=Crassostrea_gigas_newGene_10601
scaffold1782	StringTie	CDS	87400	87635	.	+	.	Parent=Crassostrea_gigas_newGene_10601.4
scaffold1782	StringTie	CDS	87789	87958	.	+	.	Parent=Crassostrea_gigas_newGene_10601.4
scaffold1782	StringTie	CDS	88123	88501	.	+	.	Parent=Crassostrea_gigas_newGene_10601.4
scaffold1782	StringTie	gene	85533	90136	.	-	.	ID=Crassostrea_gigas_newGene_10602
scaffold1782	StringTie	mRNA	85533	90034	.	-	.	ID=Crassostrea_gigas_newGene_10602.1;Parent=Crassostrea_gigas_newGene_10602
scaffold1782	StringTie	CDS	85533	86194	.	-	.	Parent=Crassostrea_gigas_newGene_10602.1
scaffold1782	StringTie	CDS	86767	86826	.	-	.	Parent=Crassostrea_gigas_newGene_10602.1
scaffold1782	StringTie	CDS	86951	87195	.	-	.	Parent=Crassostrea_gigas_newGene_10602.1
scaffold1782	StringTie	CDS	87657	87936	.	-	.	Parent=Crassostrea_gigas_newGene_10602.1
scaffold1782	StringTie	CDS	88148	88477	.	-	.	Parent=Crassostrea_gigas_newGene_10602.1
scaffold1782	StringTie	CDS	88785	89012	.	-	.	Parent=Crassostrea_gigas_newGene_10602.1
scaffold1782	StringTie	CDS	89329	89554	.	-	.	Parent=Crassostrea_gigas_newGene_10602.1
scaffold1782	StringTie	CDS	89977	90034	.	-	.	Parent=Crassostrea_gigas_newGene_10602.1
scaffold1782	StringTie	mRNA	87433	90136	.	-	.	ID=Crassostrea_gigas_newGene_10602.2;Parent=Crassostrea_gigas_newGene_10602
scaffold1782	StringTie	CDS	87433	87608	.	-	.	Parent=Crassostrea_gigas_newGene_10602.2
scaffold1782	StringTie	CDS	87770	87936	.	-	.	Parent=Crassostrea_gigas_newGene_10602.2
scaffold1782	StringTie	CDS	88148	88477	.	-	.	Parent=Crassostrea_gigas_newGene_10602.2
scaffold1782	StringTie	CDS	88785	90136	.	-	.	Parent=Crassostrea_gigas_newGene_10602.2
scaffold1782	StringTie	mRNA	87433	90034	.	-	.	ID=Crassostrea_gigas_newGene_10602.3;Parent=Crassostrea_gigas_newGene_10602
scaffold1782	StringTie	CDS	87433	87608	.	-	.	Parent=Crassostrea_gigas_newGene_10602.3
scaffold1782	StringTie	CDS	87770	87936	.	-	.	Parent=Crassostrea_gigas_newGene_10602.3
scaffold1782	StringTie	CDS	88148	88477	.	-	.	Parent=Crassostrea_gigas_newGene_10602.3
scaffold1782	StringTie	CDS	88785	89012	.	-	.	Parent=Crassostrea_gigas_newGene_10602.3
scaffold1782	StringTie	CDS	89329	89554	.	-	.	Parent=Crassostrea_gigas_newGene_10602.3
scaffold1782	StringTie	CDS	89977	90034	.	-	.	Parent=Crassostrea_gigas_newGene_10602.3
scaffold1782	StringTie	mRNA	87770	90136	.	-	.	ID=Crassostrea_gigas_newGene_10602.4;Parent=Crassostrea_gigas_newGene_10602
scaffold1782	StringTie	CDS	87770	87936	.	-	.	Parent=Crassostrea_gigas_newGene_10602.4
scaffold1782	StringTie	CDS	88148	88477	.	-	.	Parent=Crassostrea_gigas_newGene_10602.4
scaffold1782	StringTie	CDS	88785	89554	.	-	.	Parent=Crassostrea_gigas_newGene_10602.4
scaffold1782	StringTie	CDS	89977	90136	.	-	.	Parent=Crassostrea_gigas_newGene_10602.4
scaffold1782	StringTie	mRNA	88552	90057	.	-	.	ID=Crassostrea_gigas_newGene_10602.5;Parent=Crassostrea_gigas_newGene_10602
scaffold1782	StringTie	CDS	88552	89012	.	-	.	Parent=Crassostrea_gigas_newGene_10602.5
scaffold1782	StringTie	CDS	89329	90057	.	-	.	Parent=Crassostrea_gigas_newGene_10602.5
scaffold1782	StringTie	gene	89990	90558	.	+	.	ID=Crassostrea_gigas_newGene_10603
scaffold1782	StringTie	mRNA	89990	90558	.	+	.	ID=Crassostrea_gigas_newGene_10603.1;Parent=Crassostrea_gigas_newGene_10603
scaffold1782	StringTie	CDS	89990	90142	.	+	.	Parent=Crassostrea_gigas_newGene_10603.1
scaffold1782	StringTie	CDS	90356	90558	.	+	.	Parent=Crassostrea_gigas_newGene_10603.1
scaffold1783	StringTie	gene	15784	20260	.	-	.	ID=Crassostrea_gigas_newGene_10606
scaffold1783	StringTie	mRNA	15784	19807	.	-	.	ID=Crassostrea_gigas_newGene_10606.1;Parent=Crassostrea_gigas_newGene_10606
scaffold1783	StringTie	CDS	15784	16106	.	-	.	Parent=Crassostrea_gigas_newGene_10606.1
scaffold1783	StringTie	CDS	16221	16340	.	-	.	Parent=Crassostrea_gigas_newGene_10606.1
scaffold1783	StringTie	CDS	18440	19807	.	-	.	Parent=Crassostrea_gigas_newGene_10606.1
scaffold1783	StringTie	mRNA	16219	20260	.	-	.	ID=Crassostrea_gigas_newGene_10606.2;Parent=Crassostrea_gigas_newGene_10606
scaffold1783	StringTie	CDS	16219	16340	.	-	.	Parent=Crassostrea_gigas_newGene_10606.2
scaffold1783	StringTie	CDS	18440	18494	.	-	.	Parent=Crassostrea_gigas_newGene_10606.2
scaffold1783	StringTie	CDS	19376	19665	.	-	.	Parent=Crassostrea_gigas_newGene_10606.2
scaffold1783	StringTie	CDS	19946	20037	.	-	.	Parent=Crassostrea_gigas_newGene_10606.2
scaffold1783	StringTie	CDS	20185	20260	.	-	.	Parent=Crassostrea_gigas_newGene_10606.2
scaffold1783	StringTie	mRNA	16219	19831	.	-	.	ID=Crassostrea_gigas_newGene_10606.3;Parent=Crassostrea_gigas_newGene_10606
scaffold1783	StringTie	CDS	16219	16340	.	-	.	Parent=Crassostrea_gigas_newGene_10606.3
scaffold1783	StringTie	CDS	18440	18494	.	-	.	Parent=Crassostrea_gigas_newGene_10606.3
scaffold1783	StringTie	CDS	19269	19831	.	-	.	Parent=Crassostrea_gigas_newGene_10606.3
scaffold1783	StringTie	mRNA	16219	19831	.	-	.	ID=Crassostrea_gigas_newGene_10606.5;Parent=Crassostrea_gigas_newGene_10606
scaffold1783	StringTie	CDS	16219	16340	.	-	.	Parent=Crassostrea_gigas_newGene_10606.5
scaffold1783	StringTie	CDS	19376	19831	.	-	.	Parent=Crassostrea_gigas_newGene_10606.5
scaffold1784	StringTie	gene	46823	67146	.	+	.	ID=Crassostrea_gigas_newGene_10617
scaffold1784	StringTie	mRNA	46823	67146	.	+	.	ID=Crassostrea_gigas_newGene_10617.1;Parent=Crassostrea_gigas_newGene_10617
scaffold1784	StringTie	CDS	46823	47496	.	+	.	Parent=Crassostrea_gigas_newGene_10617.1
scaffold1784	StringTie	CDS	47616	47903	.	+	.	Parent=Crassostrea_gigas_newGene_10617.1
scaffold1784	StringTie	CDS	48412	48690	.	+	.	Parent=Crassostrea_gigas_newGene_10617.1
scaffold1784	StringTie	CDS	50648	50953	.	+	.	Parent=Crassostrea_gigas_newGene_10617.1
scaffold1784	StringTie	CDS	51060	51341	.	+	.	Parent=Crassostrea_gigas_newGene_10617.1
scaffold1784	StringTie	CDS	51956	52243	.	+	.	Parent=Crassostrea_gigas_newGene_10617.1
scaffold1784	StringTie	CDS	53888	53932	.	+	.	Parent=Crassostrea_gigas_newGene_10617.1
scaffold1784	StringTie	CDS	54071	54181	.	+	.	Parent=Crassostrea_gigas_newGene_10617.1
scaffold1784	StringTie	CDS	54290	54502	.	+	.	Parent=Crassostrea_gigas_newGene_10617.1
scaffold1784	StringTie	CDS	55445	55738	.	+	.	Parent=Crassostrea_gigas_newGene_10617.1
scaffold1784	StringTie	CDS	55883	55984	.	+	.	Parent=Crassostrea_gigas_newGene_10617.1
scaffold1784	StringTie	CDS	62828	62875	.	+	.	Parent=Crassostrea_gigas_newGene_10617.1
scaffold1784	StringTie	CDS	65256	65326	.	+	.	Parent=Crassostrea_gigas_newGene_10617.1
scaffold1784	StringTie	CDS	65510	67146	.	+	.	Parent=Crassostrea_gigas_newGene_10617.1
scaffold1784	StringTie	mRNA	52569	54764	.	+	.	ID=Crassostrea_gigas_newGene_10617.2;Parent=Crassostrea_gigas_newGene_10617
scaffold1784	StringTie	CDS	52569	54181	.	+	.	Parent=Crassostrea_gigas_newGene_10617.2
scaffold1784	StringTie	CDS	54290	54764	.	+	.	Parent=Crassostrea_gigas_newGene_10617.2
scaffold1784	StringTie	mRNA	55915	67144	.	+	.	ID=Crassostrea_gigas_newGene_10617.3;Parent=Crassostrea_gigas_newGene_10617
scaffold1784	StringTie	CDS	55915	55984	.	+	.	Parent=Crassostrea_gigas_newGene_10617.3
scaffold1784	StringTie	CDS	62828	62875	.	+	.	Parent=Crassostrea_gigas_newGene_10617.3
scaffold1784	StringTie	CDS	65256	65326	.	+	.	Parent=Crassostrea_gigas_newGene_10617.3
scaffold1784	StringTie	CDS	65592	67144	.	+	.	Parent=Crassostrea_gigas_newGene_10617.3
scaffold1785	StringTie	gene	41239	42189	.	+	.	ID=Crassostrea_gigas_newGene_10620
scaffold1785	StringTie	mRNA	41239	42189	.	+	.	ID=Crassostrea_gigas_newGene_10620.1;Parent=Crassostrea_gigas_newGene_10620
scaffold1785	StringTie	CDS	41239	41559	.	+	.	Parent=Crassostrea_gigas_newGene_10620.1
scaffold1785	StringTie	CDS	41872	42189	.	+	.	Parent=Crassostrea_gigas_newGene_10620.1
scaffold1785	StringTie	gene	167213	169183	.	+	.	ID=Crassostrea_gigas_newGene_10627
scaffold1785	StringTie	mRNA	167213	169183	.	+	.	ID=Crassostrea_gigas_newGene_10627.1;Parent=Crassostrea_gigas_newGene_10627
scaffold1785	StringTie	CDS	167213	167250	.	+	.	Parent=Crassostrea_gigas_newGene_10627.1
scaffold1785	StringTie	CDS	167454	167942	.	+	.	Parent=Crassostrea_gigas_newGene_10627.1
scaffold1785	StringTie	CDS	168488	169183	.	+	.	Parent=Crassostrea_gigas_newGene_10627.1
scaffold1219	StringTie	gene	41154	47935	.	-	.	ID=Crassostrea_gigas_newGene_1063
scaffold1219	StringTie	mRNA	41154	47935	.	-	.	ID=Crassostrea_gigas_newGene_1063.1;Parent=Crassostrea_gigas_newGene_1063
scaffold1219	StringTie	CDS	41154	41670	.	-	.	Parent=Crassostrea_gigas_newGene_1063.1
scaffold1219	StringTie	CDS	44841	44931	.	-	.	Parent=Crassostrea_gigas_newGene_1063.1
scaffold1219	StringTie	CDS	45450	47935	.	-	.	Parent=Crassostrea_gigas_newGene_1063.1
scaffold1219	StringTie	mRNA	41283	47935	.	-	.	ID=Crassostrea_gigas_newGene_1063.10;Parent=Crassostrea_gigas_newGene_1063
scaffold1219	StringTie	CDS	41283	41670	.	-	.	Parent=Crassostrea_gigas_newGene_1063.10
scaffold1219	StringTie	CDS	44841	44931	.	-	.	Parent=Crassostrea_gigas_newGene_1063.10
scaffold1219	StringTie	CDS	45450	45567	.	-	.	Parent=Crassostrea_gigas_newGene_1063.10
scaffold1219	StringTie	CDS	45779	45857	.	-	.	Parent=Crassostrea_gigas_newGene_1063.10
scaffold1219	StringTie	CDS	47190	47935	.	-	.	Parent=Crassostrea_gigas_newGene_1063.10
scaffold1219	StringTie	mRNA	41284	47768	.	-	.	ID=Crassostrea_gigas_newGene_1063.11;Parent=Crassostrea_gigas_newGene_1063
scaffold1219	StringTie	CDS	41284	41670	.	-	.	Parent=Crassostrea_gigas_newGene_1063.11
scaffold1219	StringTie	CDS	44841	44931	.	-	.	Parent=Crassostrea_gigas_newGene_1063.11
scaffold1219	StringTie	CDS	45450	46429	.	-	.	Parent=Crassostrea_gigas_newGene_1063.11
scaffold1219	StringTie	CDS	47190	47768	.	-	.	Parent=Crassostrea_gigas_newGene_1063.11
scaffold1219	StringTie	mRNA	41300	47935	.	-	.	ID=Crassostrea_gigas_newGene_1063.12;Parent=Crassostrea_gigas_newGene_1063
scaffold1219	StringTie	CDS	41300	41670	.	-	.	Parent=Crassostrea_gigas_newGene_1063.12
scaffold1219	StringTie	CDS	44841	44931	.	-	.	Parent=Crassostrea_gigas_newGene_1063.12
scaffold1219	StringTie	CDS	45450	45857	.	-	.	Parent=Crassostrea_gigas_newGene_1063.12
scaffold1219	StringTie	CDS	47190	47935	.	-	.	Parent=Crassostrea_gigas_newGene_1063.12
scaffold1219	StringTie	mRNA	41300	47434	.	-	.	ID=Crassostrea_gigas_newGene_1063.13;Parent=Crassostrea_gigas_newGene_1063
scaffold1219	StringTie	CDS	41300	41670	.	-	.	Parent=Crassostrea_gigas_newGene_1063.13
scaffold1219	StringTie	CDS	44841	46429	.	-	.	Parent=Crassostrea_gigas_newGene_1063.13
scaffold1219	StringTie	CDS	47190	47434	.	-	.	Parent=Crassostrea_gigas_newGene_1063.13
scaffold1219	StringTie	mRNA	41300	47647	.	-	.	ID=Crassostrea_gigas_newGene_1063.14;Parent=Crassostrea_gigas_newGene_1063
scaffold1219	StringTie	CDS	41300	41670	.	-	.	Parent=Crassostrea_gigas_newGene_1063.14
scaffold1219	StringTie	CDS	44841	44931	.	-	.	Parent=Crassostrea_gigas_newGene_1063.14
scaffold1219	StringTie	CDS	45450	45567	.	-	.	Parent=Crassostrea_gigas_newGene_1063.14
scaffold1219	StringTie	CDS	45779	46429	.	-	.	Parent=Crassostrea_gigas_newGene_1063.14
scaffold1219	StringTie	CDS	47190	47647	.	-	.	Parent=Crassostrea_gigas_newGene_1063.14
scaffold1219	StringTie	mRNA	41300	47365	.	-	.	ID=Crassostrea_gigas_newGene_1063.15;Parent=Crassostrea_gigas_newGene_1063
scaffold1219	StringTie	CDS	41300	41670	.	-	.	Parent=Crassostrea_gigas_newGene_1063.15
scaffold1219	StringTie	CDS	44841	44931	.	-	.	Parent=Crassostrea_gigas_newGene_1063.15
scaffold1219	StringTie	CDS	45450	45567	.	-	.	Parent=Crassostrea_gigas_newGene_1063.15
scaffold1219	StringTie	CDS	47190	47365	.	-	.	Parent=Crassostrea_gigas_newGene_1063.15
scaffold1219	StringTie	mRNA	41305	47341	.	-	.	ID=Crassostrea_gigas_newGene_1063.2;Parent=Crassostrea_gigas_newGene_1063
scaffold1219	StringTie	CDS	41305	41670	.	-	.	Parent=Crassostrea_gigas_newGene_1063.2
scaffold1219	StringTie	CDS	44841	44931	.	-	.	Parent=Crassostrea_gigas_newGene_1063.2
scaffold1219	StringTie	CDS	45450	45857	.	-	.	Parent=Crassostrea_gigas_newGene_1063.2
scaffold1219	StringTie	CDS	46187	47341	.	-	.	Parent=Crassostrea_gigas_newGene_1063.2
scaffold1219	StringTie	mRNA	41305	47341	.	-	.	ID=Crassostrea_gigas_newGene_1063.3;Parent=Crassostrea_gigas_newGene_1063
scaffold1219	StringTie	CDS	41305	41670	.	-	.	Parent=Crassostrea_gigas_newGene_1063.3
scaffold1219	StringTie	CDS	44841	44931	.	-	.	Parent=Crassostrea_gigas_newGene_1063.3
scaffold1219	StringTie	CDS	45450	45567	.	-	.	Parent=Crassostrea_gigas_newGene_1063.3
scaffold1219	StringTie	CDS	45779	45857	.	-	.	Parent=Crassostrea_gigas_newGene_1063.3
scaffold1219	StringTie	CDS	46187	47341	.	-	.	Parent=Crassostrea_gigas_newGene_1063.3
scaffold1219	StringTie	mRNA	41305	47341	.	-	.	ID=Crassostrea_gigas_newGene_1063.4;Parent=Crassostrea_gigas_newGene_1063
scaffold1219	StringTie	CDS	41305	41670	.	-	.	Parent=Crassostrea_gigas_newGene_1063.4
scaffold1219	StringTie	CDS	44841	44931	.	-	.	Parent=Crassostrea_gigas_newGene_1063.4
scaffold1219	StringTie	CDS	45450	46783	.	-	.	Parent=Crassostrea_gigas_newGene_1063.4
scaffold1219	StringTie	CDS	47190	47341	.	-	.	Parent=Crassostrea_gigas_newGene_1063.4
scaffold1219	StringTie	mRNA	41305	47341	.	-	.	ID=Crassostrea_gigas_newGene_1063.5;Parent=Crassostrea_gigas_newGene_1063
scaffold1219	StringTie	CDS	41305	41670	.	-	.	Parent=Crassostrea_gigas_newGene_1063.5
scaffold1219	StringTie	CDS	47190	47341	.	-	.	Parent=Crassostrea_gigas_newGene_1063.5
scaffold1219	StringTie	mRNA	41305	47341	.	-	.	ID=Crassostrea_gigas_newGene_1063.6;Parent=Crassostrea_gigas_newGene_1063
scaffold1219	StringTie	CDS	41305	41670	.	-	.	Parent=Crassostrea_gigas_newGene_1063.6
scaffold1219	StringTie	CDS	45450	47341	.	-	.	Parent=Crassostrea_gigas_newGene_1063.6
scaffold1219	StringTie	mRNA	41318	47434	.	-	.	ID=Crassostrea_gigas_newGene_1063.7;Parent=Crassostrea_gigas_newGene_1063
scaffold1219	StringTie	CDS	41318	41670	.	-	.	Parent=Crassostrea_gigas_newGene_1063.7
scaffold1219	StringTie	CDS	45450	46429	.	-	.	Parent=Crassostrea_gigas_newGene_1063.7
scaffold1219	StringTie	CDS	47190	47434	.	-	.	Parent=Crassostrea_gigas_newGene_1063.7
scaffold1219	StringTie	mRNA	41194	47816	.	-	.	ID=Crassostrea_gigas_newGene_1063.8;Parent=Crassostrea_gigas_newGene_1063
scaffold1219	StringTie	CDS	41194	41670	.	-	.	Parent=Crassostrea_gigas_newGene_1063.8
scaffold1219	StringTie	CDS	44841	44931	.	-	.	Parent=Crassostrea_gigas_newGene_1063.8
scaffold1219	StringTie	CDS	45450	45567	.	-	.	Parent=Crassostrea_gigas_newGene_1063.8
scaffold1219	StringTie	CDS	45779	47816	.	-	.	Parent=Crassostrea_gigas_newGene_1063.8
scaffold1219	StringTie	mRNA	41194	47816	.	-	.	ID=Crassostrea_gigas_newGene_1063.9;Parent=Crassostrea_gigas_newGene_1063
scaffold1219	StringTie	CDS	41194	41670	.	-	.	Parent=Crassostrea_gigas_newGene_1063.9
scaffold1219	StringTie	CDS	44841	47816	.	-	.	Parent=Crassostrea_gigas_newGene_1063.9
scaffold1785	StringTie	gene	232211	237130	.	-	.	ID=Crassostrea_gigas_newGene_10630
scaffold1785	StringTie	mRNA	232211	237130	.	-	.	ID=Crassostrea_gigas_newGene_10630.1;Parent=Crassostrea_gigas_newGene_10630
scaffold1785	StringTie	CDS	232211	235998	.	-	.	Parent=Crassostrea_gigas_newGene_10630.1
scaffold1785	StringTie	CDS	236559	236760	.	-	.	Parent=Crassostrea_gigas_newGene_10630.1
scaffold1785	StringTie	CDS	237047	237130	.	-	.	Parent=Crassostrea_gigas_newGene_10630.1
C30176	StringTie	gene	3306	5177	.	+	.	ID=Crassostrea_gigas_newGene_10633
C30176	StringTie	mRNA	3306	5177	.	+	.	ID=Crassostrea_gigas_newGene_10633.1;Parent=Crassostrea_gigas_newGene_10633
C30176	StringTie	CDS	3306	4137	.	+	.	Parent=Crassostrea_gigas_newGene_10633.1
C30176	StringTie	CDS	4968	5177	.	+	.	Parent=Crassostrea_gigas_newGene_10633.1
C30176	StringTie	mRNA	3725	5148	.	+	.	ID=Crassostrea_gigas_newGene_10633.2;Parent=Crassostrea_gigas_newGene_10633
C30176	StringTie	CDS	3725	4137	.	+	.	Parent=Crassostrea_gigas_newGene_10633.2
C30176	StringTie	CDS	4991	5148	.	+	.	Parent=Crassostrea_gigas_newGene_10633.2
scaffold1785	StringTie	gene	285299	288912	.	+	.	ID=Crassostrea_gigas_newGene_10638
scaffold1785	StringTie	mRNA	285299	288912	.	+	.	ID=Crassostrea_gigas_newGene_10638.1;Parent=Crassostrea_gigas_newGene_10638
scaffold1785	StringTie	CDS	285299	286563	.	+	.	Parent=Crassostrea_gigas_newGene_10638.1
scaffold1785	StringTie	CDS	286766	288912	.	+	.	Parent=Crassostrea_gigas_newGene_10638.1
scaffold1785	StringTie	gene	332057	333291	.	+	.	ID=Crassostrea_gigas_newGene_10643
scaffold1785	StringTie	mRNA	332057	333291	.	+	.	ID=Crassostrea_gigas_newGene_10643.1;Parent=Crassostrea_gigas_newGene_10643
scaffold1785	StringTie	CDS	332057	332143	.	+	.	Parent=Crassostrea_gigas_newGene_10643.1
scaffold1785	StringTie	CDS	332395	332473	.	+	.	Parent=Crassostrea_gigas_newGene_10643.1
scaffold1785	StringTie	CDS	332587	333291	.	+	.	Parent=Crassostrea_gigas_newGene_10643.1
scaffold1785	StringTie	gene	578851	580472	.	-	.	ID=Crassostrea_gigas_newGene_10652
scaffold1785	StringTie	mRNA	578851	580472	.	-	.	ID=Crassostrea_gigas_newGene_10652.1;Parent=Crassostrea_gigas_newGene_10652
scaffold1785	StringTie	CDS	578851	579670	.	-	.	Parent=Crassostrea_gigas_newGene_10652.1
scaffold1785	StringTie	CDS	580113	580472	.	-	.	Parent=Crassostrea_gigas_newGene_10652.1
scaffold1785	StringTie	gene	590316	619524	.	-	.	ID=Crassostrea_gigas_newGene_10654
scaffold1785	StringTie	mRNA	590316	619524	.	-	.	ID=Crassostrea_gigas_newGene_10654.1;Parent=Crassostrea_gigas_newGene_10654
scaffold1785	StringTie	CDS	590316	590346	.	-	.	Parent=Crassostrea_gigas_newGene_10654.1
scaffold1785	StringTie	CDS	591891	592055	.	-	.	Parent=Crassostrea_gigas_newGene_10654.1
scaffold1785	StringTie	CDS	599201	599460	.	-	.	Parent=Crassostrea_gigas_newGene_10654.1
scaffold1785	StringTie	CDS	599603	599706	.	-	.	Parent=Crassostrea_gigas_newGene_10654.1
scaffold1785	StringTie	CDS	602531	602715	.	-	.	Parent=Crassostrea_gigas_newGene_10654.1
scaffold1785	StringTie	CDS	604493	604701	.	-	.	Parent=Crassostrea_gigas_newGene_10654.1
scaffold1785	StringTie	CDS	617138	617320	.	-	.	Parent=Crassostrea_gigas_newGene_10654.1
scaffold1785	StringTie	CDS	619438	619524	.	-	.	Parent=Crassostrea_gigas_newGene_10654.1
scaffold1219	StringTie	gene	128558	129435	.	-	.	ID=Crassostrea_gigas_newGene_1066
scaffold1219	StringTie	mRNA	128558	129435	.	-	.	ID=Crassostrea_gigas_newGene_1066.1;Parent=Crassostrea_gigas_newGene_1066
scaffold1219	StringTie	CDS	128558	129012	.	-	.	Parent=Crassostrea_gigas_newGene_1066.1
scaffold1219	StringTie	CDS	129189	129435	.	-	.	Parent=Crassostrea_gigas_newGene_1066.1
scaffold1785	StringTie	gene	790740	794105	.	+	.	ID=Crassostrea_gigas_newGene_10670
scaffold1785	StringTie	mRNA	790740	794105	.	+	.	ID=Crassostrea_gigas_newGene_10670.1;Parent=Crassostrea_gigas_newGene_10670
scaffold1785	StringTie	CDS	790740	791752	.	+	.	Parent=Crassostrea_gigas_newGene_10670.1
scaffold1785	StringTie	CDS	791792	794105	.	+	.	Parent=Crassostrea_gigas_newGene_10670.1
scaffold1785	StringTie	gene	834862	837851	.	+	.	ID=Crassostrea_gigas_newGene_10672
scaffold1785	StringTie	mRNA	834862	837851	.	+	.	ID=Crassostrea_gigas_newGene_10672.2;Parent=Crassostrea_gigas_newGene_10672
scaffold1785	StringTie	CDS	834862	835009	.	+	.	Parent=Crassostrea_gigas_newGene_10672.2
scaffold1785	StringTie	CDS	835052	837851	.	+	.	Parent=Crassostrea_gigas_newGene_10672.2
scaffold1785	StringTie	gene	867818	869738	.	+	.	ID=Crassostrea_gigas_newGene_10677
scaffold1785	StringTie	mRNA	867818	869738	.	+	.	ID=Crassostrea_gigas_newGene_10677.1;Parent=Crassostrea_gigas_newGene_10677
scaffold1785	StringTie	CDS	867818	868931	.	+	.	Parent=Crassostrea_gigas_newGene_10677.1
scaffold1785	StringTie	CDS	869256	869738	.	+	.	Parent=Crassostrea_gigas_newGene_10677.1
scaffold1785	StringTie	gene	867958	869738	.	-	.	ID=Crassostrea_gigas_newGene_10678
scaffold1785	StringTie	mRNA	867958	869738	.	-	.	ID=Crassostrea_gigas_newGene_10678.1;Parent=Crassostrea_gigas_newGene_10678
scaffold1785	StringTie	CDS	867958	869047	.	-	.	Parent=Crassostrea_gigas_newGene_10678.1
scaffold1785	StringTie	CDS	869373	869738	.	-	.	Parent=Crassostrea_gigas_newGene_10678.1
scaffold1785	StringTie	gene	904857	905658	.	-	.	ID=Crassostrea_gigas_newGene_10680
scaffold1785	StringTie	mRNA	904857	905658	.	-	.	ID=Crassostrea_gigas_newGene_10680.1;Parent=Crassostrea_gigas_newGene_10680
scaffold1785	StringTie	CDS	904857	905311	.	-	.	Parent=Crassostrea_gigas_newGene_10680.1
scaffold1785	StringTie	CDS	905339	905658	.	-	.	Parent=Crassostrea_gigas_newGene_10680.1
C23946	StringTie	gene	1289	2502	.	+	.	ID=Crassostrea_gigas_newGene_1069
C23946	StringTie	mRNA	1300	2497	.	+	.	ID=Crassostrea_gigas_newGene_1069.2;Parent=Crassostrea_gigas_newGene_1069
C23946	StringTie	CDS	1300	1986	.	+	.	Parent=Crassostrea_gigas_newGene_1069.2
C23946	StringTie	CDS	2027	2497	.	+	.	Parent=Crassostrea_gigas_newGene_1069.2
scaffold1786	StringTie	gene	83516	84519	.	+	.	ID=Crassostrea_gigas_newGene_10693
scaffold1786	StringTie	mRNA	83516	84519	.	+	.	ID=Crassostrea_gigas_newGene_10693.1;Parent=Crassostrea_gigas_newGene_10693
scaffold1786	StringTie	CDS	83516	83769	.	+	.	Parent=Crassostrea_gigas_newGene_10693.1
scaffold1786	StringTie	CDS	84374	84519	.	+	.	Parent=Crassostrea_gigas_newGene_10693.1
scaffold1787	StringTie	gene	4	893	.	+	.	ID=Crassostrea_gigas_newGene_10703
scaffold1787	StringTie	mRNA	4	893	.	+	.	ID=Crassostrea_gigas_newGene_10703.1;Parent=Crassostrea_gigas_newGene_10703
scaffold1787	StringTie	CDS	4	251	.	+	.	Parent=Crassostrea_gigas_newGene_10703.1
scaffold1787	StringTie	CDS	723	893	.	+	.	Parent=Crassostrea_gigas_newGene_10703.1
scaffold1787	StringTie	gene	1184	16177	.	+	.	ID=Crassostrea_gigas_newGene_10704
scaffold1787	StringTie	mRNA	1184	16177	.	+	.	ID=Crassostrea_gigas_newGene_10704.1;Parent=Crassostrea_gigas_newGene_10704
scaffold1787	StringTie	CDS	1184	1318	.	+	.	Parent=Crassostrea_gigas_newGene_10704.1
scaffold1787	StringTie	CDS	1460	1583	.	+	.	Parent=Crassostrea_gigas_newGene_10704.1
scaffold1787	StringTie	CDS	1719	1841	.	+	.	Parent=Crassostrea_gigas_newGene_10704.1
scaffold1787	StringTie	CDS	3388	3527	.	+	.	Parent=Crassostrea_gigas_newGene_10704.1
scaffold1787	StringTie	CDS	14494	14616	.	+	.	Parent=Crassostrea_gigas_newGene_10704.1
scaffold1787	StringTie	CDS	15133	16177	.	+	.	Parent=Crassostrea_gigas_newGene_10704.1
scaffold1787	StringTie	mRNA	1251	14211	.	+	.	ID=Crassostrea_gigas_newGene_10704.2;Parent=Crassostrea_gigas_newGene_10704
scaffold1787	StringTie	CDS	1251	1318	.	+	.	Parent=Crassostrea_gigas_newGene_10704.2
scaffold1787	StringTie	CDS	1460	1583	.	+	.	Parent=Crassostrea_gigas_newGene_10704.2
scaffold1787	StringTie	CDS	1719	1841	.	+	.	Parent=Crassostrea_gigas_newGene_10704.2
scaffold1787	StringTie	CDS	3388	3527	.	+	.	Parent=Crassostrea_gigas_newGene_10704.2
scaffold1787	StringTie	CDS	14123	14211	.	+	.	Parent=Crassostrea_gigas_newGene_10704.2
scaffold1787	StringTie	mRNA	1461	15275	.	+	.	ID=Crassostrea_gigas_newGene_10704.3;Parent=Crassostrea_gigas_newGene_10704
scaffold1787	StringTie	CDS	1461	1583	.	+	.	Parent=Crassostrea_gigas_newGene_10704.3
scaffold1787	StringTie	CDS	1719	1841	.	+	.	Parent=Crassostrea_gigas_newGene_10704.3
scaffold1787	StringTie	CDS	3388	3527	.	+	.	Parent=Crassostrea_gigas_newGene_10704.3
scaffold1787	StringTie	CDS	14178	14232	.	+	.	Parent=Crassostrea_gigas_newGene_10704.3
scaffold1787	StringTie	CDS	14494	14616	.	+	.	Parent=Crassostrea_gigas_newGene_10704.3
scaffold1787	StringTie	CDS	15133	15275	.	+	.	Parent=Crassostrea_gigas_newGene_10704.3
scaffold1788	StringTie	gene	33138	35593	.	-	.	ID=Crassostrea_gigas_newGene_10709
scaffold1788	StringTie	mRNA	33138	35593	.	-	.	ID=Crassostrea_gigas_newGene_10709.1;Parent=Crassostrea_gigas_newGene_10709
scaffold1788	StringTie	CDS	33138	33691	.	-	.	Parent=Crassostrea_gigas_newGene_10709.1
scaffold1788	StringTie	CDS	35209	35593	.	-	.	Parent=Crassostrea_gigas_newGene_10709.1
scaffold1219	StringTie	gene	229670	245883	.	+	.	ID=Crassostrea_gigas_newGene_1071
scaffold1219	StringTie	mRNA	229670	245883	.	+	.	ID=Crassostrea_gigas_newGene_1071.1;Parent=Crassostrea_gigas_newGene_1071
scaffold1219	StringTie	CDS	229670	229749	.	+	.	Parent=Crassostrea_gigas_newGene_1071.1
scaffold1219	StringTie	CDS	231736	232125	.	+	.	Parent=Crassostrea_gigas_newGene_1071.1
scaffold1219	StringTie	CDS	235936	236068	.	+	.	Parent=Crassostrea_gigas_newGene_1071.1
scaffold1219	StringTie	CDS	236758	236961	.	+	.	Parent=Crassostrea_gigas_newGene_1071.1
scaffold1219	StringTie	CDS	237577	237822	.	+	.	Parent=Crassostrea_gigas_newGene_1071.1
scaffold1219	StringTie	CDS	238169	238522	.	+	.	Parent=Crassostrea_gigas_newGene_1071.1
scaffold1219	StringTie	CDS	240860	240955	.	+	.	Parent=Crassostrea_gigas_newGene_1071.1
scaffold1219	StringTie	CDS	241363	241431	.	+	.	Parent=Crassostrea_gigas_newGene_1071.1
scaffold1219	StringTie	CDS	243359	243451	.	+	.	Parent=Crassostrea_gigas_newGene_1071.1
scaffold1219	StringTie	CDS	243885	244010	.	+	.	Parent=Crassostrea_gigas_newGene_1071.1
scaffold1219	StringTie	CDS	244122	244302	.	+	.	Parent=Crassostrea_gigas_newGene_1071.1
scaffold1219	StringTie	CDS	245461	245883	.	+	.	Parent=Crassostrea_gigas_newGene_1071.1
scaffold1219	StringTie	mRNA	231408	241635	.	+	.	ID=Crassostrea_gigas_newGene_1071.2;Parent=Crassostrea_gigas_newGene_1071
scaffold1219	StringTie	CDS	231408	232125	.	+	.	Parent=Crassostrea_gigas_newGene_1071.2
scaffold1219	StringTie	CDS	235936	236068	.	+	.	Parent=Crassostrea_gigas_newGene_1071.2
scaffold1219	StringTie	CDS	236758	236961	.	+	.	Parent=Crassostrea_gigas_newGene_1071.2
scaffold1219	StringTie	CDS	237577	237822	.	+	.	Parent=Crassostrea_gigas_newGene_1071.2
scaffold1219	StringTie	CDS	238169	238522	.	+	.	Parent=Crassostrea_gigas_newGene_1071.2
scaffold1219	StringTie	CDS	240860	241635	.	+	.	Parent=Crassostrea_gigas_newGene_1071.2
scaffold1788	StringTie	gene	115756	120860	.	-	.	ID=Crassostrea_gigas_newGene_10718
scaffold1788	StringTie	mRNA	115756	120860	.	-	.	ID=Crassostrea_gigas_newGene_10718.1;Parent=Crassostrea_gigas_newGene_10718
scaffold1788	StringTie	CDS	115756	118336	.	-	.	Parent=Crassostrea_gigas_newGene_10718.1
scaffold1788	StringTie	CDS	120818	120860	.	-	.	Parent=Crassostrea_gigas_newGene_10718.1
scaffold1219	StringTie	gene	241690	242907	.	-	.	ID=Crassostrea_gigas_newGene_1072
scaffold1219	StringTie	mRNA	241690	242839	.	-	.	ID=Crassostrea_gigas_newGene_1072.1;Parent=Crassostrea_gigas_newGene_1072
scaffold1219	StringTie	CDS	241690	242115	.	-	.	Parent=Crassostrea_gigas_newGene_1072.1
scaffold1219	StringTie	CDS	242144	242839	.	-	.	Parent=Crassostrea_gigas_newGene_1072.1
scaffold1788	StringTie	gene	310116	316948	.	+	.	ID=Crassostrea_gigas_newGene_10722
scaffold1788	StringTie	mRNA	310116	316948	.	+	.	ID=Crassostrea_gigas_newGene_10722.1;Parent=Crassostrea_gigas_newGene_10722
scaffold1788	StringTie	CDS	310116	310779	.	+	.	Parent=Crassostrea_gigas_newGene_10722.1
scaffold1788	StringTie	CDS	314881	315104	.	+	.	Parent=Crassostrea_gigas_newGene_10722.1
scaffold1788	StringTie	CDS	315756	316948	.	+	.	Parent=Crassostrea_gigas_newGene_10722.1
scaffold1788	StringTie	mRNA	310217	316573	.	+	.	ID=Crassostrea_gigas_newGene_10722.2;Parent=Crassostrea_gigas_newGene_10722
scaffold1788	StringTie	CDS	310217	310779	.	+	.	Parent=Crassostrea_gigas_newGene_10722.2
scaffold1788	StringTie	CDS	314484	314562	.	+	.	Parent=Crassostrea_gigas_newGene_10722.2
scaffold1788	StringTie	CDS	314881	315104	.	+	.	Parent=Crassostrea_gigas_newGene_10722.2
scaffold1788	StringTie	CDS	315756	316573	.	+	.	Parent=Crassostrea_gigas_newGene_10722.2
scaffold1788	StringTie	mRNA	312732	315930	.	+	.	ID=Crassostrea_gigas_newGene_10722.3;Parent=Crassostrea_gigas_newGene_10722
scaffold1788	StringTie	CDS	312732	312973	.	+	.	Parent=Crassostrea_gigas_newGene_10722.3
scaffold1788	StringTie	CDS	314484	314562	.	+	.	Parent=Crassostrea_gigas_newGene_10722.3
scaffold1788	StringTie	CDS	314881	315104	.	+	.	Parent=Crassostrea_gigas_newGene_10722.3
scaffold1788	StringTie	CDS	315756	315930	.	+	.	Parent=Crassostrea_gigas_newGene_10722.3
C30206	StringTie	gene	1329	7496	.	-	.	ID=Crassostrea_gigas_newGene_10725
C30206	StringTie	mRNA	1329	7496	.	-	.	ID=Crassostrea_gigas_newGene_10725.1;Parent=Crassostrea_gigas_newGene_10725
C30206	StringTie	CDS	1329	4184	.	-	.	Parent=Crassostrea_gigas_newGene_10725.1
C30206	StringTie	CDS	6699	6788	.	-	.	Parent=Crassostrea_gigas_newGene_10725.1
C30206	StringTie	CDS	7143	7191	.	-	.	Parent=Crassostrea_gigas_newGene_10725.1
C30206	StringTie	CDS	7301	7496	.	-	.	Parent=Crassostrea_gigas_newGene_10725.1
C30206	StringTie	mRNA	1329	7400	.	-	.	ID=Crassostrea_gigas_newGene_10725.2;Parent=Crassostrea_gigas_newGene_10725
C30206	StringTie	CDS	1329	3625	.	-	.	Parent=Crassostrea_gigas_newGene_10725.2
C30206	StringTie	CDS	4104	4184	.	-	.	Parent=Crassostrea_gigas_newGene_10725.2
C30206	StringTie	CDS	6699	6788	.	-	.	Parent=Crassostrea_gigas_newGene_10725.2
C30206	StringTie	CDS	7143	7191	.	-	.	Parent=Crassostrea_gigas_newGene_10725.2
C30206	StringTie	CDS	7301	7400	.	-	.	Parent=Crassostrea_gigas_newGene_10725.2
C30206	StringTie	mRNA	1329	7400	.	-	.	ID=Crassostrea_gigas_newGene_10725.3;Parent=Crassostrea_gigas_newGene_10725
C30206	StringTie	CDS	1329	3625	.	-	.	Parent=Crassostrea_gigas_newGene_10725.3
C30206	StringTie	CDS	4104	4172	.	-	.	Parent=Crassostrea_gigas_newGene_10725.3
C30206	StringTie	CDS	6699	6788	.	-	.	Parent=Crassostrea_gigas_newGene_10725.3
C30206	StringTie	CDS	7143	7191	.	-	.	Parent=Crassostrea_gigas_newGene_10725.3
C30206	StringTie	CDS	7301	7400	.	-	.	Parent=Crassostrea_gigas_newGene_10725.3
C30206	StringTie	mRNA	1329	7400	.	-	.	ID=Crassostrea_gigas_newGene_10725.4;Parent=Crassostrea_gigas_newGene_10725
C30206	StringTie	CDS	1329	3625	.	-	.	Parent=Crassostrea_gigas_newGene_10725.4
C30206	StringTie	CDS	4104	6788	.	-	.	Parent=Crassostrea_gigas_newGene_10725.4
C30206	StringTie	CDS	7143	7191	.	-	.	Parent=Crassostrea_gigas_newGene_10725.4
C30206	StringTie	CDS	7301	7400	.	-	.	Parent=Crassostrea_gigas_newGene_10725.4
C30206	StringTie	mRNA	2835	7496	.	-	.	ID=Crassostrea_gigas_newGene_10725.5;Parent=Crassostrea_gigas_newGene_10725
C30206	StringTie	CDS	2835	4172	.	-	.	Parent=Crassostrea_gigas_newGene_10725.5
C30206	StringTie	CDS	6699	6788	.	-	.	Parent=Crassostrea_gigas_newGene_10725.5
C30206	StringTie	CDS	7143	7191	.	-	.	Parent=Crassostrea_gigas_newGene_10725.5
C30206	StringTie	CDS	7301	7496	.	-	.	Parent=Crassostrea_gigas_newGene_10725.5
C30206	StringTie	mRNA	3036	7400	.	-	.	ID=Crassostrea_gigas_newGene_10725.6;Parent=Crassostrea_gigas_newGene_10725
C30206	StringTie	CDS	3036	3166	.	-	.	Parent=Crassostrea_gigas_newGene_10725.6
C30206	StringTie	CDS	4104	4184	.	-	.	Parent=Crassostrea_gigas_newGene_10725.6
C30206	StringTie	CDS	6699	6788	.	-	.	Parent=Crassostrea_gigas_newGene_10725.6
C30206	StringTie	CDS	7143	7191	.	-	.	Parent=Crassostrea_gigas_newGene_10725.6
C30206	StringTie	CDS	7301	7400	.	-	.	Parent=Crassostrea_gigas_newGene_10725.6
scaffold1788	StringTie	gene	479910	486168	.	-	.	ID=Crassostrea_gigas_newGene_10729
scaffold1788	StringTie	mRNA	479910	486168	.	-	.	ID=Crassostrea_gigas_newGene_10729.1;Parent=Crassostrea_gigas_newGene_10729
scaffold1788	StringTie	CDS	479910	481069	.	-	.	Parent=Crassostrea_gigas_newGene_10729.1
scaffold1788	StringTie	CDS	481468	481596	.	-	.	Parent=Crassostrea_gigas_newGene_10729.1
scaffold1788	StringTie	CDS	485921	486168	.	-	.	Parent=Crassostrea_gigas_newGene_10729.1
scaffold1788	StringTie	mRNA	479910	484889	.	-	.	ID=Crassostrea_gigas_newGene_10729.2;Parent=Crassostrea_gigas_newGene_10729
scaffold1788	StringTie	CDS	479910	481069	.	-	.	Parent=Crassostrea_gigas_newGene_10729.2
scaffold1788	StringTie	CDS	481468	481596	.	-	.	Parent=Crassostrea_gigas_newGene_10729.2
scaffold1788	StringTie	CDS	484639	484889	.	-	.	Parent=Crassostrea_gigas_newGene_10729.2
scaffold179	StringTie	gene	54340	56222	.	+	.	ID=Crassostrea_gigas_newGene_10751
scaffold179	StringTie	mRNA	54340	56222	.	+	.	ID=Crassostrea_gigas_newGene_10751.1;Parent=Crassostrea_gigas_newGene_10751
scaffold179	StringTie	CDS	54340	55437	.	+	.	Parent=Crassostrea_gigas_newGene_10751.1
scaffold179	StringTie	CDS	55952	56222	.	+	.	Parent=Crassostrea_gigas_newGene_10751.1
scaffold179	StringTie	gene	64881	66041	.	-	.	ID=Crassostrea_gigas_newGene_10754
scaffold179	StringTie	mRNA	64881	66041	.	-	.	ID=Crassostrea_gigas_newGene_10754.1;Parent=Crassostrea_gigas_newGene_10754
scaffold179	StringTie	CDS	64881	65137	.	-	.	Parent=Crassostrea_gigas_newGene_10754.1
scaffold179	StringTie	CDS	65583	65626	.	-	.	Parent=Crassostrea_gigas_newGene_10754.1
scaffold179	StringTie	CDS	65733	66041	.	-	.	Parent=Crassostrea_gigas_newGene_10754.1
scaffold179	StringTie	mRNA	64881	66041	.	-	.	ID=Crassostrea_gigas_newGene_10754.2;Parent=Crassostrea_gigas_newGene_10754
scaffold179	StringTie	CDS	64881	65137	.	-	.	Parent=Crassostrea_gigas_newGene_10754.2
scaffold179	StringTie	CDS	65583	66041	.	-	.	Parent=Crassostrea_gigas_newGene_10754.2
scaffold179	StringTie	gene	71262	74745	.	-	.	ID=Crassostrea_gigas_newGene_10757
scaffold179	StringTie	mRNA	71262	74745	.	-	.	ID=Crassostrea_gigas_newGene_10757.1;Parent=Crassostrea_gigas_newGene_10757
scaffold179	StringTie	CDS	71262	71327	.	-	.	Parent=Crassostrea_gigas_newGene_10757.1
scaffold179	StringTie	CDS	73763	74745	.	-	.	Parent=Crassostrea_gigas_newGene_10757.1
scaffold179	StringTie	gene	72525	73423	.	+	.	ID=Crassostrea_gigas_newGene_10758
scaffold179	StringTie	mRNA	72525	73423	.	+	.	ID=Crassostrea_gigas_newGene_10758.1;Parent=Crassostrea_gigas_newGene_10758
scaffold179	StringTie	CDS	72525	72599	.	+	.	Parent=Crassostrea_gigas_newGene_10758.1
scaffold179	StringTie	CDS	73132	73423	.	+	.	Parent=Crassostrea_gigas_newGene_10758.1
scaffold179	StringTie	gene	73837	74697	.	+	.	ID=Crassostrea_gigas_newGene_10759
scaffold179	StringTie	mRNA	73837	74697	.	+	.	ID=Crassostrea_gigas_newGene_10759.1;Parent=Crassostrea_gigas_newGene_10759
scaffold179	StringTie	CDS	73837	73856	.	+	.	Parent=Crassostrea_gigas_newGene_10759.1
scaffold179	StringTie	CDS	73907	74697	.	+	.	Parent=Crassostrea_gigas_newGene_10759.1
C30226	StringTie	gene	281	7386	.	-	.	ID=Crassostrea_gigas_newGene_10768
C30226	StringTie	mRNA	281	7386	.	-	.	ID=Crassostrea_gigas_newGene_10768.1;Parent=Crassostrea_gigas_newGene_10768
C30226	StringTie	CDS	281	545	.	-	.	Parent=Crassostrea_gigas_newGene_10768.1
C30226	StringTie	CDS	1719	1850	.	-	.	Parent=Crassostrea_gigas_newGene_10768.1
C30226	StringTie	CDS	6884	7386	.	-	.	Parent=Crassostrea_gigas_newGene_10768.1
C30226	StringTie	mRNA	4107	7386	.	-	.	ID=Crassostrea_gigas_newGene_10768.3;Parent=Crassostrea_gigas_newGene_10768
C30226	StringTie	CDS	4107	5409	.	-	.	Parent=Crassostrea_gigas_newGene_10768.3
C30226	StringTie	CDS	5745	5919	.	-	.	Parent=Crassostrea_gigas_newGene_10768.3
C30226	StringTie	CDS	6106	7386	.	-	.	Parent=Crassostrea_gigas_newGene_10768.3
scaffold1791	StringTie	gene	110984	112216	.	+	.	ID=Crassostrea_gigas_newGene_10769
scaffold1791	StringTie	mRNA	110984	112216	.	+	.	ID=Crassostrea_gigas_newGene_10769.1;Parent=Crassostrea_gigas_newGene_10769
scaffold1791	StringTie	CDS	110984	111077	.	+	.	Parent=Crassostrea_gigas_newGene_10769.1
scaffold1791	StringTie	CDS	111282	112216	.	+	.	Parent=Crassostrea_gigas_newGene_10769.1
scaffold1791	StringTie	mRNA	110998	112214	.	+	.	ID=Crassostrea_gigas_newGene_10769.2;Parent=Crassostrea_gigas_newGene_10769
scaffold1791	StringTie	CDS	110998	111077	.	+	.	Parent=Crassostrea_gigas_newGene_10769.2
scaffold1791	StringTie	CDS	111285	112214	.	+	.	Parent=Crassostrea_gigas_newGene_10769.2
scaffold1791	StringTie	gene	125596	126801	.	-	.	ID=Crassostrea_gigas_newGene_10770
scaffold1791	StringTie	mRNA	125596	126801	.	-	.	ID=Crassostrea_gigas_newGene_10770.1;Parent=Crassostrea_gigas_newGene_10770
scaffold1791	StringTie	CDS	125596	125710	.	-	.	Parent=Crassostrea_gigas_newGene_10770.1
scaffold1791	StringTie	CDS	126289	126801	.	-	.	Parent=Crassostrea_gigas_newGene_10770.1
C30232	StringTie	gene	2060	3378	.	-	.	ID=Crassostrea_gigas_newGene_10771
C30232	StringTie	mRNA	2060	3378	.	-	.	ID=Crassostrea_gigas_newGene_10771.1;Parent=Crassostrea_gigas_newGene_10771
C30232	StringTie	CDS	2060	2690	.	-	.	Parent=Crassostrea_gigas_newGene_10771.1
C30232	StringTie	CDS	2809	2985	.	-	.	Parent=Crassostrea_gigas_newGene_10771.1
C30232	StringTie	CDS	3093	3378	.	-	.	Parent=Crassostrea_gigas_newGene_10771.1
C30232	StringTie	mRNA	2202	3298	.	-	.	ID=Crassostrea_gigas_newGene_10771.2;Parent=Crassostrea_gigas_newGene_10771
C30232	StringTie	CDS	2202	2690	.	-	.	Parent=Crassostrea_gigas_newGene_10771.2
C30232	StringTie	CDS	2845	2985	.	-	.	Parent=Crassostrea_gigas_newGene_10771.2
C30232	StringTie	CDS	3093	3298	.	-	.	Parent=Crassostrea_gigas_newGene_10771.2
scaffold1791	StringTie	gene	130486	134249	.	-	.	ID=Crassostrea_gigas_newGene_10773
scaffold1791	StringTie	mRNA	130486	133424	.	-	.	ID=Crassostrea_gigas_newGene_10773.1;Parent=Crassostrea_gigas_newGene_10773
scaffold1791	StringTie	CDS	130486	130677	.	-	.	Parent=Crassostrea_gigas_newGene_10773.1
scaffold1791	StringTie	CDS	131488	131538	.	-	.	Parent=Crassostrea_gigas_newGene_10773.1
scaffold1791	StringTie	CDS	131659	131686	.	-	.	Parent=Crassostrea_gigas_newGene_10773.1
scaffold1791	StringTie	CDS	131830	131906	.	-	.	Parent=Crassostrea_gigas_newGene_10773.1
scaffold1791	StringTie	CDS	132590	133424	.	-	.	Parent=Crassostrea_gigas_newGene_10773.1
scaffold1791	StringTie	mRNA	130568	134158	.	-	.	ID=Crassostrea_gigas_newGene_10773.2;Parent=Crassostrea_gigas_newGene_10773
scaffold1791	StringTie	CDS	130568	130677	.	-	.	Parent=Crassostrea_gigas_newGene_10773.2
scaffold1791	StringTie	CDS	131488	131538	.	-	.	Parent=Crassostrea_gigas_newGene_10773.2
scaffold1791	StringTie	CDS	131659	131686	.	-	.	Parent=Crassostrea_gigas_newGene_10773.2
scaffold1791	StringTie	CDS	131830	131906	.	-	.	Parent=Crassostrea_gigas_newGene_10773.2
scaffold1791	StringTie	CDS	133140	133421	.	-	.	Parent=Crassostrea_gigas_newGene_10773.2
scaffold1791	StringTie	CDS	133703	134008	.	-	.	Parent=Crassostrea_gigas_newGene_10773.2
scaffold1791	StringTie	CDS	134109	134158	.	-	.	Parent=Crassostrea_gigas_newGene_10773.2
scaffold1791	StringTie	mRNA	130569	134249	.	-	.	ID=Crassostrea_gigas_newGene_10773.3;Parent=Crassostrea_gigas_newGene_10773
scaffold1791	StringTie	CDS	130569	130677	.	-	.	Parent=Crassostrea_gigas_newGene_10773.3
scaffold1791	StringTie	CDS	131488	131538	.	-	.	Parent=Crassostrea_gigas_newGene_10773.3
scaffold1791	StringTie	CDS	131659	131686	.	-	.	Parent=Crassostrea_gigas_newGene_10773.3
scaffold1791	StringTie	CDS	131830	131906	.	-	.	Parent=Crassostrea_gigas_newGene_10773.3
scaffold1791	StringTie	CDS	132590	132732	.	-	.	Parent=Crassostrea_gigas_newGene_10773.3
scaffold1791	StringTie	CDS	132857	132964	.	-	.	Parent=Crassostrea_gigas_newGene_10773.3
scaffold1791	StringTie	CDS	133140	133421	.	-	.	Parent=Crassostrea_gigas_newGene_10773.3
scaffold1791	StringTie	CDS	133703	134008	.	-	.	Parent=Crassostrea_gigas_newGene_10773.3
scaffold1791	StringTie	CDS	134109	134249	.	-	.	Parent=Crassostrea_gigas_newGene_10773.3
scaffold1791	StringTie	mRNA	132589	134158	.	-	.	ID=Crassostrea_gigas_newGene_10773.5;Parent=Crassostrea_gigas_newGene_10773
scaffold1791	StringTie	CDS	132589	132604	.	-	.	Parent=Crassostrea_gigas_newGene_10773.5
scaffold1791	StringTie	CDS	132857	132964	.	-	.	Parent=Crassostrea_gigas_newGene_10773.5
scaffold1791	StringTie	CDS	133140	133421	.	-	.	Parent=Crassostrea_gigas_newGene_10773.5
scaffold1791	StringTie	CDS	133703	134008	.	-	.	Parent=Crassostrea_gigas_newGene_10773.5
scaffold1791	StringTie	CDS	134109	134158	.	-	.	Parent=Crassostrea_gigas_newGene_10773.5
scaffold1791	StringTie	gene	134899	135469	.	-	.	ID=Crassostrea_gigas_newGene_10774
scaffold1791	StringTie	mRNA	134899	135469	.	-	.	ID=Crassostrea_gigas_newGene_10774.1;Parent=Crassostrea_gigas_newGene_10774
scaffold1791	StringTie	CDS	134899	135089	.	-	.	Parent=Crassostrea_gigas_newGene_10774.1
scaffold1791	StringTie	CDS	135313	135469	.	-	.	Parent=Crassostrea_gigas_newGene_10774.1
scaffold1791	StringTie	gene	160233	192691	.	-	.	ID=Crassostrea_gigas_newGene_10776
scaffold1791	StringTie	mRNA	160233	192661	.	-	.	ID=Crassostrea_gigas_newGene_10776.1;Parent=Crassostrea_gigas_newGene_10776
scaffold1791	StringTie	CDS	160233	161377	.	-	.	Parent=Crassostrea_gigas_newGene_10776.1
scaffold1791	StringTie	CDS	161972	164232	.	-	.	Parent=Crassostrea_gigas_newGene_10776.1
scaffold1791	StringTie	CDS	188562	188663	.	-	.	Parent=Crassostrea_gigas_newGene_10776.1
scaffold1791	StringTie	CDS	190357	190496	.	-	.	Parent=Crassostrea_gigas_newGene_10776.1
scaffold1791	StringTie	CDS	192586	192661	.	-	.	Parent=Crassostrea_gigas_newGene_10776.1
scaffold1791	StringTie	mRNA	160233	162573	.	-	.	ID=Crassostrea_gigas_newGene_10776.2;Parent=Crassostrea_gigas_newGene_10776
scaffold1791	StringTie	CDS	160233	161377	.	-	.	Parent=Crassostrea_gigas_newGene_10776.2
scaffold1791	StringTie	CDS	161873	162573	.	-	.	Parent=Crassostrea_gigas_newGene_10776.2
scaffold1791	StringTie	mRNA	160501	162575	.	-	.	ID=Crassostrea_gigas_newGene_10776.3;Parent=Crassostrea_gigas_newGene_10776
scaffold1791	StringTie	CDS	160501	161377	.	-	.	Parent=Crassostrea_gigas_newGene_10776.3
scaffold1791	StringTie	CDS	161477	162575	.	-	.	Parent=Crassostrea_gigas_newGene_10776.3
scaffold1791	StringTie	mRNA	160510	162072	.	-	.	ID=Crassostrea_gigas_newGene_10776.4;Parent=Crassostrea_gigas_newGene_10776
scaffold1791	StringTie	CDS	160510	161377	.	-	.	Parent=Crassostrea_gigas_newGene_10776.4
scaffold1791	StringTie	CDS	161477	161549	.	-	.	Parent=Crassostrea_gigas_newGene_10776.4
scaffold1791	StringTie	CDS	161946	162072	.	-	.	Parent=Crassostrea_gigas_newGene_10776.4
scaffold1791	StringTie	mRNA	186179	192691	.	-	.	ID=Crassostrea_gigas_newGene_10776.5;Parent=Crassostrea_gigas_newGene_10776
scaffold1791	StringTie	CDS	186179	186566	.	-	.	Parent=Crassostrea_gigas_newGene_10776.5
scaffold1791	StringTie	CDS	188170	188205	.	-	.	Parent=Crassostrea_gigas_newGene_10776.5
scaffold1791	StringTie	CDS	188562	188663	.	-	.	Parent=Crassostrea_gigas_newGene_10776.5
scaffold1791	StringTie	CDS	190357	190496	.	-	.	Parent=Crassostrea_gigas_newGene_10776.5
scaffold1791	StringTie	CDS	192586	192691	.	-	.	Parent=Crassostrea_gigas_newGene_10776.5
scaffold1791	StringTie	mRNA	186179	192643	.	-	.	ID=Crassostrea_gigas_newGene_10776.6;Parent=Crassostrea_gigas_newGene_10776
scaffold1791	StringTie	CDS	186179	186566	.	-	.	Parent=Crassostrea_gigas_newGene_10776.6
scaffold1791	StringTie	CDS	188562	188663	.	-	.	Parent=Crassostrea_gigas_newGene_10776.6
scaffold1791	StringTie	CDS	190357	190496	.	-	.	Parent=Crassostrea_gigas_newGene_10776.6
scaffold1791	StringTie	CDS	192586	192643	.	-	.	Parent=Crassostrea_gigas_newGene_10776.6
scaffold1791	StringTie	gene	160426	164375	.	+	.	ID=Crassostrea_gigas_newGene_10777
scaffold1791	StringTie	mRNA	160426	162125	.	+	.	ID=Crassostrea_gigas_newGene_10777.1;Parent=Crassostrea_gigas_newGene_10777
scaffold1791	StringTie	CDS	160426	161290	.	+	.	Parent=Crassostrea_gigas_newGene_10777.1
scaffold1791	StringTie	CDS	161588	162125	.	+	.	Parent=Crassostrea_gigas_newGene_10777.1
scaffold1791	StringTie	mRNA	160501	164375	.	+	.	ID=Crassostrea_gigas_newGene_10777.2;Parent=Crassostrea_gigas_newGene_10777
scaffold1791	StringTie	CDS	160501	161389	.	+	.	Parent=Crassostrea_gigas_newGene_10777.2
scaffold1791	StringTie	CDS	161588	164375	.	+	.	Parent=Crassostrea_gigas_newGene_10777.2
scaffold1791	StringTie	mRNA	160501	162575	.	+	.	ID=Crassostrea_gigas_newGene_10777.3;Parent=Crassostrea_gigas_newGene_10777
scaffold1791	StringTie	CDS	160501	161389	.	+	.	Parent=Crassostrea_gigas_newGene_10777.3
scaffold1791	StringTie	CDS	161588	161613	.	+	.	Parent=Crassostrea_gigas_newGene_10777.3
scaffold1791	StringTie	CDS	161911	162575	.	+	.	Parent=Crassostrea_gigas_newGene_10777.3
scaffold1791	StringTie	mRNA	160505	162571	.	+	.	ID=Crassostrea_gigas_newGene_10777.4;Parent=Crassostrea_gigas_newGene_10777
scaffold1791	StringTie	CDS	160505	161686	.	+	.	Parent=Crassostrea_gigas_newGene_10777.4
scaffold1791	StringTie	CDS	161786	162571	.	+	.	Parent=Crassostrea_gigas_newGene_10777.4
scaffold1791	StringTie	mRNA	160510	162118	.	+	.	ID=Crassostrea_gigas_newGene_10777.5;Parent=Crassostrea_gigas_newGene_10777
scaffold1791	StringTie	CDS	160510	161389	.	+	.	Parent=Crassostrea_gigas_newGene_10777.5
scaffold1791	StringTie	CDS	161588	161648	.	+	.	Parent=Crassostrea_gigas_newGene_10777.5
scaffold1791	StringTie	CDS	161946	162118	.	+	.	Parent=Crassostrea_gigas_newGene_10777.5
scaffold1791	StringTie	gene	167323	169921	.	-	.	ID=Crassostrea_gigas_newGene_10778
scaffold1791	StringTie	mRNA	167325	169921	.	-	.	ID=Crassostrea_gigas_newGene_10778.2;Parent=Crassostrea_gigas_newGene_10778
scaffold1791	StringTie	CDS	167325	167666	.	-	.	Parent=Crassostrea_gigas_newGene_10778.2
scaffold1791	StringTie	CDS	168163	169921	.	-	.	Parent=Crassostrea_gigas_newGene_10778.2
C30232	StringTie	gene	3788	4986	.	+	.	ID=Crassostrea_gigas_newGene_10779
C30232	StringTie	mRNA	3788	4986	.	+	.	ID=Crassostrea_gigas_newGene_10779.1;Parent=Crassostrea_gigas_newGene_10779
C30232	StringTie	CDS	3788	4034	.	+	.	Parent=Crassostrea_gigas_newGene_10779.1
C30232	StringTie	CDS	4484	4663	.	+	.	Parent=Crassostrea_gigas_newGene_10779.1
C30232	StringTie	CDS	4736	4986	.	+	.	Parent=Crassostrea_gigas_newGene_10779.1
scaffold1792	StringTie	gene	135805	152739	.	+	.	ID=Crassostrea_gigas_newGene_10785
scaffold1792	StringTie	mRNA	135805	152559	.	+	.	ID=Crassostrea_gigas_newGene_10785.1;Parent=Crassostrea_gigas_newGene_10785
scaffold1792	StringTie	CDS	135805	135939	.	+	.	Parent=Crassostrea_gigas_newGene_10785.1
scaffold1792	StringTie	CDS	146219	146335	.	+	.	Parent=Crassostrea_gigas_newGene_10785.1
scaffold1792	StringTie	CDS	149113	152559	.	+	.	Parent=Crassostrea_gigas_newGene_10785.1
scaffold1792	StringTie	mRNA	135805	152739	.	+	.	ID=Crassostrea_gigas_newGene_10785.2;Parent=Crassostrea_gigas_newGene_10785
scaffold1792	StringTie	CDS	135805	135939	.	+	.	Parent=Crassostrea_gigas_newGene_10785.2
scaffold1792	StringTie	CDS	146219	146335	.	+	.	Parent=Crassostrea_gigas_newGene_10785.2
scaffold1792	StringTie	CDS	148103	149250	.	+	.	Parent=Crassostrea_gigas_newGene_10785.2
scaffold1792	StringTie	CDS	150705	152739	.	+	.	Parent=Crassostrea_gigas_newGene_10785.2
scaffold1792	StringTie	gene	216566	219588	.	+	.	ID=Crassostrea_gigas_newGene_10788
scaffold1792	StringTie	mRNA	216566	219335	.	+	.	ID=Crassostrea_gigas_newGene_10788.1;Parent=Crassostrea_gigas_newGene_10788
scaffold1792	StringTie	CDS	216566	217313	.	+	.	Parent=Crassostrea_gigas_newGene_10788.1
scaffold1792	StringTie	CDS	218383	218474	.	+	.	Parent=Crassostrea_gigas_newGene_10788.1
scaffold1792	StringTie	CDS	218694	219335	.	+	.	Parent=Crassostrea_gigas_newGene_10788.1
scaffold1792	StringTie	mRNA	218047	219588	.	+	.	ID=Crassostrea_gigas_newGene_10788.2;Parent=Crassostrea_gigas_newGene_10788
scaffold1792	StringTie	CDS	218047	218474	.	+	.	Parent=Crassostrea_gigas_newGene_10788.2
scaffold1792	StringTie	CDS	218735	219588	.	+	.	Parent=Crassostrea_gigas_newGene_10788.2
C23992	StringTie	gene	944	1966	.	-	.	ID=Crassostrea_gigas_newGene_1080
C23992	StringTie	mRNA	944	1966	.	-	.	ID=Crassostrea_gigas_newGene_1080.1;Parent=Crassostrea_gigas_newGene_1080
C23992	StringTie	CDS	944	978	.	-	.	Parent=Crassostrea_gigas_newGene_1080.1
C23992	StringTie	CDS	1160	1204	.	-	.	Parent=Crassostrea_gigas_newGene_1080.1
C23992	StringTie	CDS	1785	1966	.	-	.	Parent=Crassostrea_gigas_newGene_1080.1
scaffold1793	StringTie	gene	69143	83171	.	+	.	ID=Crassostrea_gigas_newGene_10805
scaffold1793	StringTie	mRNA	69143	83171	.	+	.	ID=Crassostrea_gigas_newGene_10805.1;Parent=Crassostrea_gigas_newGene_10805
scaffold1793	StringTie	CDS	69143	69444	.	+	.	Parent=Crassostrea_gigas_newGene_10805.1
scaffold1793	StringTie	CDS	70563	70718	.	+	.	Parent=Crassostrea_gigas_newGene_10805.1
scaffold1793	StringTie	CDS	79037	79348	.	+	.	Parent=Crassostrea_gigas_newGene_10805.1
scaffold1793	StringTie	CDS	80953	81243	.	+	.	Parent=Crassostrea_gigas_newGene_10805.1
scaffold1793	StringTie	CDS	81672	81974	.	+	.	Parent=Crassostrea_gigas_newGene_10805.1
scaffold1793	StringTie	CDS	82893	83171	.	+	.	Parent=Crassostrea_gigas_newGene_10805.1
scaffold1794	StringTie	gene	19621	20260	.	-	.	ID=Crassostrea_gigas_newGene_10808
scaffold1794	StringTie	mRNA	19621	20260	.	-	.	ID=Crassostrea_gigas_newGene_10808.1;Parent=Crassostrea_gigas_newGene_10808
scaffold1794	StringTie	CDS	19621	19924	.	-	.	Parent=Crassostrea_gigas_newGene_10808.1
scaffold1794	StringTie	CDS	20023	20260	.	-	.	Parent=Crassostrea_gigas_newGene_10808.1
scaffold1794	StringTie	gene	200112	202141	.	-	.	ID=Crassostrea_gigas_newGene_10814
scaffold1794	StringTie	mRNA	200112	202141	.	-	.	ID=Crassostrea_gigas_newGene_10814.1;Parent=Crassostrea_gigas_newGene_10814
scaffold1794	StringTie	CDS	200112	200363	.	-	.	Parent=Crassostrea_gigas_newGene_10814.1
scaffold1794	StringTie	CDS	200842	202141	.	-	.	Parent=Crassostrea_gigas_newGene_10814.1
scaffold1219	StringTie	gene	408171	417747	.	-	.	ID=Crassostrea_gigas_newGene_1082
scaffold1219	StringTie	mRNA	408171	417747	.	-	.	ID=Crassostrea_gigas_newGene_1082.1;Parent=Crassostrea_gigas_newGene_1082
scaffold1219	StringTie	CDS	408171	410133	.	-	.	Parent=Crassostrea_gigas_newGene_1082.1
scaffold1219	StringTie	CDS	410391	410508	.	-	.	Parent=Crassostrea_gigas_newGene_1082.1
scaffold1219	StringTie	CDS	417388	417460	.	-	.	Parent=Crassostrea_gigas_newGene_1082.1
scaffold1219	StringTie	CDS	417679	417747	.	-	.	Parent=Crassostrea_gigas_newGene_1082.1
scaffold1794	StringTie	gene	581487	582277	.	+	.	ID=Crassostrea_gigas_newGene_10834
scaffold1794	StringTie	mRNA	581487	582277	.	+	.	ID=Crassostrea_gigas_newGene_10834.1;Parent=Crassostrea_gigas_newGene_10834
scaffold1794	StringTie	CDS	581487	581730	.	+	.	Parent=Crassostrea_gigas_newGene_10834.1
scaffold1794	StringTie	CDS	582153	582277	.	+	.	Parent=Crassostrea_gigas_newGene_10834.1
scaffold1794	StringTie	gene	592406	597096	.	-	.	ID=Crassostrea_gigas_newGene_10839
scaffold1794	StringTie	mRNA	593189	597096	.	-	.	ID=Crassostrea_gigas_newGene_10839.2;Parent=Crassostrea_gigas_newGene_10839
scaffold1794	StringTie	CDS	593189	593245	.	-	.	Parent=Crassostrea_gigas_newGene_10839.2
scaffold1794	StringTie	CDS	595393	597096	.	-	.	Parent=Crassostrea_gigas_newGene_10839.2
scaffold1219	StringTie	gene	421894	422748	.	+	.	ID=Crassostrea_gigas_newGene_1084
scaffold1219	StringTie	mRNA	421894	422748	.	+	.	ID=Crassostrea_gigas_newGene_1084.1;Parent=Crassostrea_gigas_newGene_1084
scaffold1219	StringTie	CDS	421894	421940	.	+	.	Parent=Crassostrea_gigas_newGene_1084.1
scaffold1219	StringTie	CDS	422143	422748	.	+	.	Parent=Crassostrea_gigas_newGene_1084.1
scaffold1794	StringTie	gene	601403	604388	.	+	.	ID=Crassostrea_gigas_newGene_10841
scaffold1794	StringTie	mRNA	601403	604388	.	+	.	ID=Crassostrea_gigas_newGene_10841.1;Parent=Crassostrea_gigas_newGene_10841
scaffold1794	StringTie	CDS	601403	601851	.	+	.	Parent=Crassostrea_gigas_newGene_10841.1
scaffold1794	StringTie	CDS	602743	602841	.	+	.	Parent=Crassostrea_gigas_newGene_10841.1
scaffold1794	StringTie	CDS	603727	603844	.	+	.	Parent=Crassostrea_gigas_newGene_10841.1
scaffold1794	StringTie	CDS	603948	604388	.	+	.	Parent=Crassostrea_gigas_newGene_10841.1
scaffold1796	StringTie	gene	27346	29064	.	-	.	ID=Crassostrea_gigas_newGene_10848
scaffold1796	StringTie	mRNA	27346	28767	.	-	.	ID=Crassostrea_gigas_newGene_10848.1;Parent=Crassostrea_gigas_newGene_10848
scaffold1796	StringTie	CDS	27346	27563	.	-	.	Parent=Crassostrea_gigas_newGene_10848.1
scaffold1796	StringTie	CDS	27858	28767	.	-	.	Parent=Crassostrea_gigas_newGene_10848.1
scaffold1796	StringTie	gene	126723	127637	.	+	.	ID=Crassostrea_gigas_newGene_10863
scaffold1796	StringTie	mRNA	126723	127637	.	+	.	ID=Crassostrea_gigas_newGene_10863.1;Parent=Crassostrea_gigas_newGene_10863
scaffold1796	StringTie	CDS	126723	126992	.	+	.	Parent=Crassostrea_gigas_newGene_10863.1
scaffold1796	StringTie	CDS	127472	127637	.	+	.	Parent=Crassostrea_gigas_newGene_10863.1
scaffold1797	StringTie	gene	33860	34614	.	-	.	ID=Crassostrea_gigas_newGene_10868
scaffold1797	StringTie	mRNA	33860	34614	.	-	.	ID=Crassostrea_gigas_newGene_10868.1;Parent=Crassostrea_gigas_newGene_10868
scaffold1797	StringTie	CDS	33860	34423	.	-	.	Parent=Crassostrea_gigas_newGene_10868.1
scaffold1797	StringTie	CDS	34568	34614	.	-	.	Parent=Crassostrea_gigas_newGene_10868.1
C23998	StringTie	gene	1	2522	.	+	.	ID=Crassostrea_gigas_newGene_1087
C23998	StringTie	mRNA	1	2522	.	+	.	ID=Crassostrea_gigas_newGene_1087.1;Parent=Crassostrea_gigas_newGene_1087
C23998	StringTie	CDS	1	479	.	+	.	Parent=Crassostrea_gigas_newGene_1087.1
C23998	StringTie	CDS	1416	1631	.	+	.	Parent=Crassostrea_gigas_newGene_1087.1
C23998	StringTie	CDS	2363	2522	.	+	.	Parent=Crassostrea_gigas_newGene_1087.1
C23998	StringTie	mRNA	1	2522	.	+	.	ID=Crassostrea_gigas_newGene_1087.2;Parent=Crassostrea_gigas_newGene_1087
C23998	StringTie	CDS	1	479	.	+	.	Parent=Crassostrea_gigas_newGene_1087.2
C23998	StringTie	CDS	2363	2522	.	+	.	Parent=Crassostrea_gigas_newGene_1087.2
scaffold1798	StringTie	gene	29458	30640	.	-	.	ID=Crassostrea_gigas_newGene_10879
scaffold1798	StringTie	mRNA	29458	30640	.	-	.	ID=Crassostrea_gigas_newGene_10879.1;Parent=Crassostrea_gigas_newGene_10879
scaffold1798	StringTie	CDS	29458	29856	.	-	.	Parent=Crassostrea_gigas_newGene_10879.1
scaffold1798	StringTie	CDS	30022	30161	.	-	.	Parent=Crassostrea_gigas_newGene_10879.1
scaffold1798	StringTie	CDS	30271	30420	.	-	.	Parent=Crassostrea_gigas_newGene_10879.1
scaffold1798	StringTie	CDS	30521	30640	.	-	.	Parent=Crassostrea_gigas_newGene_10879.1
C30292	StringTie	gene	4951	7433	.	+	.	ID=Crassostrea_gigas_newGene_10889
C30292	StringTie	mRNA	4951	7433	.	+	.	ID=Crassostrea_gigas_newGene_10889.1;Parent=Crassostrea_gigas_newGene_10889
C30292	StringTie	CDS	4951	5067	.	+	.	Parent=Crassostrea_gigas_newGene_10889.1
C30292	StringTie	CDS	5417	5495	.	+	.	Parent=Crassostrea_gigas_newGene_10889.1
C30292	StringTie	CDS	6693	6860	.	+	.	Parent=Crassostrea_gigas_newGene_10889.1
C30292	StringTie	CDS	7267	7433	.	+	.	Parent=Crassostrea_gigas_newGene_10889.1
scaffold1799	StringTie	gene	71327	76647	.	+	.	ID=Crassostrea_gigas_newGene_10890
scaffold1799	StringTie	mRNA	71334	73558	.	+	.	ID=Crassostrea_gigas_newGene_10890.2;Parent=Crassostrea_gigas_newGene_10890
scaffold1799	StringTie	CDS	71334	71403	.	+	.	Parent=Crassostrea_gigas_newGene_10890.2
scaffold1799	StringTie	CDS	71584	73558	.	+	.	Parent=Crassostrea_gigas_newGene_10890.2
scaffold18	StringTie	gene	35744	38506	.	+	.	ID=Crassostrea_gigas_newGene_10895
scaffold18	StringTie	mRNA	35744	38506	.	+	.	ID=Crassostrea_gigas_newGene_10895.1;Parent=Crassostrea_gigas_newGene_10895
scaffold18	StringTie	CDS	35744	35877	.	+	.	Parent=Crassostrea_gigas_newGene_10895.1
scaffold18	StringTie	CDS	37607	38506	.	+	.	Parent=Crassostrea_gigas_newGene_10895.1
scaffold1219	StringTie	gene	487972	489160	.	-	.	ID=Crassostrea_gigas_newGene_1090
scaffold1219	StringTie	mRNA	487972	489160	.	-	.	ID=Crassostrea_gigas_newGene_1090.1;Parent=Crassostrea_gigas_newGene_1090
scaffold1219	StringTie	CDS	487972	488281	.	-	.	Parent=Crassostrea_gigas_newGene_1090.1
scaffold1219	StringTie	CDS	488750	488770	.	-	.	Parent=Crassostrea_gigas_newGene_1090.1
scaffold1219	StringTie	CDS	489002	489160	.	-	.	Parent=Crassostrea_gigas_newGene_1090.1
scaffold180	StringTie	gene	89420	91398	.	+	.	ID=Crassostrea_gigas_newGene_10904
scaffold180	StringTie	mRNA	89420	91398	.	+	.	ID=Crassostrea_gigas_newGene_10904.1;Parent=Crassostrea_gigas_newGene_10904
scaffold180	StringTie	CDS	89420	89436	.	+	.	Parent=Crassostrea_gigas_newGene_10904.1
scaffold180	StringTie	CDS	91149	91398	.	+	.	Parent=Crassostrea_gigas_newGene_10904.1
scaffold1219	StringTie	gene	493277	495061	.	-	.	ID=Crassostrea_gigas_newGene_1091
scaffold1219	StringTie	mRNA	493277	495061	.	-	.	ID=Crassostrea_gigas_newGene_1091.1;Parent=Crassostrea_gigas_newGene_1091
scaffold1219	StringTie	CDS	493277	493570	.	-	.	Parent=Crassostrea_gigas_newGene_1091.1
scaffold1219	StringTie	CDS	494617	494631	.	-	.	Parent=Crassostrea_gigas_newGene_1091.1
scaffold1219	StringTie	CDS	494870	495061	.	-	.	Parent=Crassostrea_gigas_newGene_1091.1
scaffold1219	StringTie	mRNA	493277	495061	.	-	.	ID=Crassostrea_gigas_newGene_1091.2;Parent=Crassostrea_gigas_newGene_1091
scaffold1219	StringTie	CDS	493277	493471	.	-	.	Parent=Crassostrea_gigas_newGene_1091.2
scaffold1219	StringTie	CDS	493502	493570	.	-	.	Parent=Crassostrea_gigas_newGene_1091.2
scaffold1219	StringTie	CDS	494617	494631	.	-	.	Parent=Crassostrea_gigas_newGene_1091.2
scaffold1219	StringTie	CDS	494870	495061	.	-	.	Parent=Crassostrea_gigas_newGene_1091.2
scaffold1800	StringTie	gene	363599	369681	.	+	.	ID=Crassostrea_gigas_newGene_10915
scaffold1800	StringTie	mRNA	363599	369681	.	+	.	ID=Crassostrea_gigas_newGene_10915.1;Parent=Crassostrea_gigas_newGene_10915
scaffold1800	StringTie	CDS	363599	364087	.	+	.	Parent=Crassostrea_gigas_newGene_10915.1
scaffold1800	StringTie	CDS	364214	364249	.	+	.	Parent=Crassostrea_gigas_newGene_10915.1
scaffold1800	StringTie	CDS	365232	365351	.	+	.	Parent=Crassostrea_gigas_newGene_10915.1
scaffold1800	StringTie	CDS	367981	368052	.	+	.	Parent=Crassostrea_gigas_newGene_10915.1
scaffold1800	StringTie	CDS	368406	368501	.	+	.	Parent=Crassostrea_gigas_newGene_10915.1
scaffold1800	StringTie	CDS	368983	369051	.	+	.	Parent=Crassostrea_gigas_newGene_10915.1
scaffold1800	StringTie	CDS	369325	369681	.	+	.	Parent=Crassostrea_gigas_newGene_10915.1
scaffold1800	StringTie	mRNA	367980	369646	.	+	.	ID=Crassostrea_gigas_newGene_10915.2;Parent=Crassostrea_gigas_newGene_10915
scaffold1800	StringTie	CDS	367980	368052	.	+	.	Parent=Crassostrea_gigas_newGene_10915.2
scaffold1800	StringTie	CDS	368406	368501	.	+	.	Parent=Crassostrea_gigas_newGene_10915.2
scaffold1800	StringTie	CDS	369325	369646	.	+	.	Parent=Crassostrea_gigas_newGene_10915.2
C17616	StringTie	gene	1	473	.	-	.	ID=Crassostrea_gigas_newGene_10918
C17616	StringTie	mRNA	1	473	.	-	.	ID=Crassostrea_gigas_newGene_10918.1;Parent=Crassostrea_gigas_newGene_10918
C17616	StringTie	CDS	1	133	.	-	.	Parent=Crassostrea_gigas_newGene_10918.1
C17616	StringTie	CDS	339	473	.	-	.	Parent=Crassostrea_gigas_newGene_10918.1
scaffold1800	StringTie	gene	440750	459647	.	-	.	ID=Crassostrea_gigas_newGene_10925
scaffold1800	StringTie	mRNA	440750	458466	.	-	.	ID=Crassostrea_gigas_newGene_10925.1;Parent=Crassostrea_gigas_newGene_10925
scaffold1800	StringTie	CDS	440750	445302	.	-	.	Parent=Crassostrea_gigas_newGene_10925.1
scaffold1800	StringTie	CDS	445425	445495	.	-	.	Parent=Crassostrea_gigas_newGene_10925.1
scaffold1800	StringTie	CDS	452419	452846	.	-	.	Parent=Crassostrea_gigas_newGene_10925.1
scaffold1800	StringTie	CDS	458357	458466	.	-	.	Parent=Crassostrea_gigas_newGene_10925.1
scaffold1800	StringTie	mRNA	440750	455702	.	-	.	ID=Crassostrea_gigas_newGene_10925.2;Parent=Crassostrea_gigas_newGene_10925
scaffold1800	StringTie	CDS	440750	445060	.	-	.	Parent=Crassostrea_gigas_newGene_10925.2
scaffold1800	StringTie	CDS	445098	445302	.	-	.	Parent=Crassostrea_gigas_newGene_10925.2
scaffold1800	StringTie	CDS	445425	445495	.	-	.	Parent=Crassostrea_gigas_newGene_10925.2
scaffold1800	StringTie	CDS	452419	452846	.	-	.	Parent=Crassostrea_gigas_newGene_10925.2
scaffold1800	StringTie	CDS	454778	455702	.	-	.	Parent=Crassostrea_gigas_newGene_10925.2
scaffold1800	StringTie	mRNA	440750	442492	.	-	.	ID=Crassostrea_gigas_newGene_10925.3;Parent=Crassostrea_gigas_newGene_10925
scaffold1800	StringTie	CDS	440750	441080	.	-	.	Parent=Crassostrea_gigas_newGene_10925.3
scaffold1800	StringTie	CDS	441818	442492	.	-	.	Parent=Crassostrea_gigas_newGene_10925.3
scaffold1800	StringTie	mRNA	440754	442184	.	-	.	ID=Crassostrea_gigas_newGene_10925.4;Parent=Crassostrea_gigas_newGene_10925
scaffold1800	StringTie	CDS	440754	441550	.	-	.	Parent=Crassostrea_gigas_newGene_10925.4
scaffold1800	StringTie	CDS	441573	442184	.	-	.	Parent=Crassostrea_gigas_newGene_10925.4
scaffold1800	StringTie	mRNA	442543	459647	.	-	.	ID=Crassostrea_gigas_newGene_10925.5;Parent=Crassostrea_gigas_newGene_10925
scaffold1800	StringTie	CDS	442543	445302	.	-	.	Parent=Crassostrea_gigas_newGene_10925.5
scaffold1800	StringTie	CDS	445425	445495	.	-	.	Parent=Crassostrea_gigas_newGene_10925.5
scaffold1800	StringTie	CDS	452419	452846	.	-	.	Parent=Crassostrea_gigas_newGene_10925.5
scaffold1800	StringTie	CDS	454778	454887	.	-	.	Parent=Crassostrea_gigas_newGene_10925.5
scaffold1800	StringTie	CDS	458357	459647	.	-	.	Parent=Crassostrea_gigas_newGene_10925.5
scaffold1800	StringTie	mRNA	443934	458454	.	-	.	ID=Crassostrea_gigas_newGene_10925.6;Parent=Crassostrea_gigas_newGene_10925
scaffold1800	StringTie	CDS	443934	445302	.	-	.	Parent=Crassostrea_gigas_newGene_10925.6
scaffold1800	StringTie	CDS	445425	445495	.	-	.	Parent=Crassostrea_gigas_newGene_10925.6
scaffold1800	StringTie	CDS	452419	452846	.	-	.	Parent=Crassostrea_gigas_newGene_10925.6
scaffold1800	StringTie	CDS	457173	457227	.	-	.	Parent=Crassostrea_gigas_newGene_10925.6
scaffold1800	StringTie	CDS	458357	458454	.	-	.	Parent=Crassostrea_gigas_newGene_10925.6
scaffold1801	StringTie	gene	45509	46749	.	-	.	ID=Crassostrea_gigas_newGene_10934
scaffold1801	StringTie	mRNA	45509	46749	.	-	.	ID=Crassostrea_gigas_newGene_10934.1;Parent=Crassostrea_gigas_newGene_10934
scaffold1801	StringTie	CDS	45509	45584	.	-	.	Parent=Crassostrea_gigas_newGene_10934.1
scaffold1801	StringTie	CDS	46413	46538	.	-	.	Parent=Crassostrea_gigas_newGene_10934.1
scaffold1801	StringTie	CDS	46695	46749	.	-	.	Parent=Crassostrea_gigas_newGene_10934.1
scaffold1801	StringTie	gene	68538	72209	.	+	.	ID=Crassostrea_gigas_newGene_10935
scaffold1801	StringTie	mRNA	68591	72204	.	+	.	ID=Crassostrea_gigas_newGene_10935.2;Parent=Crassostrea_gigas_newGene_10935
scaffold1801	StringTie	CDS	68591	69700	.	+	.	Parent=Crassostrea_gigas_newGene_10935.2
scaffold1801	StringTie	CDS	69835	72204	.	+	.	Parent=Crassostrea_gigas_newGene_10935.2
scaffold1801	StringTie	mRNA	68693	69766	.	+	.	ID=Crassostrea_gigas_newGene_10935.3;Parent=Crassostrea_gigas_newGene_10935
scaffold1801	StringTie	CDS	68693	69368	.	+	.	Parent=Crassostrea_gigas_newGene_10935.3
scaffold1801	StringTie	CDS	69643	69766	.	+	.	Parent=Crassostrea_gigas_newGene_10935.3
scaffold1801	StringTie	mRNA	69831	72209	.	+	.	ID=Crassostrea_gigas_newGene_10935.4;Parent=Crassostrea_gigas_newGene_10935
scaffold1801	StringTie	CDS	69831	69907	.	+	.	Parent=Crassostrea_gigas_newGene_10935.4
scaffold1801	StringTie	CDS	70056	72209	.	+	.	Parent=Crassostrea_gigas_newGene_10935.4
scaffold1801	StringTie	gene	68546	72209	.	-	.	ID=Crassostrea_gigas_newGene_10937
scaffold1801	StringTie	mRNA	68546	72209	.	-	.	ID=Crassostrea_gigas_newGene_10937.2;Parent=Crassostrea_gigas_newGene_10937
scaffold1801	StringTie	CDS	68546	69173	.	-	.	Parent=Crassostrea_gigas_newGene_10937.2
scaffold1801	StringTie	CDS	69250	72209	.	-	.	Parent=Crassostrea_gigas_newGene_10937.2
scaffold1801	StringTie	mRNA	68546	72209	.	-	.	ID=Crassostrea_gigas_newGene_10937.3;Parent=Crassostrea_gigas_newGene_10937
scaffold1801	StringTie	CDS	68546	69173	.	-	.	Parent=Crassostrea_gigas_newGene_10937.3
scaffold1801	StringTie	CDS	69250	69613	.	-	.	Parent=Crassostrea_gigas_newGene_10937.3
scaffold1801	StringTie	CDS	70045	72209	.	-	.	Parent=Crassostrea_gigas_newGene_10937.3
scaffold1801	StringTie	mRNA	68546	72209	.	-	.	ID=Crassostrea_gigas_newGene_10937.4;Parent=Crassostrea_gigas_newGene_10937
scaffold1801	StringTie	CDS	68546	69173	.	-	.	Parent=Crassostrea_gigas_newGene_10937.4
scaffold1801	StringTie	CDS	69250	70691	.	-	.	Parent=Crassostrea_gigas_newGene_10937.4
scaffold1801	StringTie	CDS	70716	72209	.	-	.	Parent=Crassostrea_gigas_newGene_10937.4
scaffold1801	StringTie	mRNA	68693	72209	.	-	.	ID=Crassostrea_gigas_newGene_10937.5;Parent=Crassostrea_gigas_newGene_10937
scaffold1801	StringTie	CDS	68693	69364	.	-	.	Parent=Crassostrea_gigas_newGene_10937.5
scaffold1801	StringTie	CDS	69773	72209	.	-	.	Parent=Crassostrea_gigas_newGene_10937.5
scaffold1801	StringTie	mRNA	68708	72209	.	-	.	ID=Crassostrea_gigas_newGene_10937.6;Parent=Crassostrea_gigas_newGene_10937
scaffold1801	StringTie	CDS	68708	69613	.	-	.	Parent=Crassostrea_gigas_newGene_10937.6
scaffold1801	StringTie	CDS	70045	70691	.	-	.	Parent=Crassostrea_gigas_newGene_10937.6
scaffold1801	StringTie	CDS	70716	72209	.	-	.	Parent=Crassostrea_gigas_newGene_10937.6
scaffold1801	StringTie	mRNA	69094	72209	.	-	.	ID=Crassostrea_gigas_newGene_10937.7;Parent=Crassostrea_gigas_newGene_10937
scaffold1801	StringTie	CDS	69094	69613	.	-	.	Parent=Crassostrea_gigas_newGene_10937.7
scaffold1801	StringTie	CDS	70045	70667	.	-	.	Parent=Crassostrea_gigas_newGene_10937.7
scaffold1801	StringTie	CDS	70716	72209	.	-	.	Parent=Crassostrea_gigas_newGene_10937.7
scaffold1801	StringTie	mRNA	69424	72208	.	-	.	ID=Crassostrea_gigas_newGene_10937.8;Parent=Crassostrea_gigas_newGene_10937
scaffold1801	StringTie	CDS	69424	69999	.	-	.	Parent=Crassostrea_gigas_newGene_10937.8
scaffold1801	StringTie	CDS	70147	72208	.	-	.	Parent=Crassostrea_gigas_newGene_10937.8
C24008	StringTie	gene	1	2530	.	+	.	ID=Crassostrea_gigas_newGene_1094
C24008	StringTie	mRNA	1	2530	.	+	.	ID=Crassostrea_gigas_newGene_1094.1;Parent=Crassostrea_gigas_newGene_1094
C24008	StringTie	CDS	1	140	.	+	.	Parent=Crassostrea_gigas_newGene_1094.1
C24008	StringTie	CDS	627	761	.	+	.	Parent=Crassostrea_gigas_newGene_1094.1
C24008	StringTie	CDS	979	2530	.	+	.	Parent=Crassostrea_gigas_newGene_1094.1
scaffold1801	StringTie	gene	95534	97005	.	-	.	ID=Crassostrea_gigas_newGene_10941
scaffold1801	StringTie	mRNA	95534	97005	.	-	.	ID=Crassostrea_gigas_newGene_10941.1;Parent=Crassostrea_gigas_newGene_10941
scaffold1801	StringTie	CDS	95534	95584	.	-	.	Parent=Crassostrea_gigas_newGene_10941.1
scaffold1801	StringTie	CDS	96150	96275	.	-	.	Parent=Crassostrea_gigas_newGene_10941.1
scaffold1801	StringTie	CDS	96550	96636	.	-	.	Parent=Crassostrea_gigas_newGene_10941.1
scaffold1801	StringTie	CDS	96743	97005	.	-	.	Parent=Crassostrea_gigas_newGene_10941.1
scaffold1803	StringTie	gene	57483	58541	.	+	.	ID=Crassostrea_gigas_newGene_10948
scaffold1803	StringTie	mRNA	57483	58541	.	+	.	ID=Crassostrea_gigas_newGene_10948.1;Parent=Crassostrea_gigas_newGene_10948
scaffold1803	StringTie	CDS	57483	58353	.	+	.	Parent=Crassostrea_gigas_newGene_10948.1
scaffold1803	StringTie	CDS	58417	58541	.	+	.	Parent=Crassostrea_gigas_newGene_10948.1
scaffold1803	StringTie	gene	134838	135590	.	-	.	ID=Crassostrea_gigas_newGene_10953
scaffold1803	StringTie	mRNA	134838	135590	.	-	.	ID=Crassostrea_gigas_newGene_10953.1;Parent=Crassostrea_gigas_newGene_10953
scaffold1803	StringTie	CDS	134838	135477	.	-	.	Parent=Crassostrea_gigas_newGene_10953.1
scaffold1803	StringTie	CDS	135498	135590	.	-	.	Parent=Crassostrea_gigas_newGene_10953.1
scaffold1803	StringTie	gene	217336	220877	.	-	.	ID=Crassostrea_gigas_newGene_10958
scaffold1803	StringTie	mRNA	217336	220874	.	-	.	ID=Crassostrea_gigas_newGene_10958.1;Parent=Crassostrea_gigas_newGene_10958
scaffold1803	StringTie	CDS	217336	218696	.	-	.	Parent=Crassostrea_gigas_newGene_10958.1
scaffold1803	StringTie	CDS	219394	219527	.	-	.	Parent=Crassostrea_gigas_newGene_10958.1
scaffold1803	StringTie	CDS	219750	219837	.	-	.	Parent=Crassostrea_gigas_newGene_10958.1
scaffold1803	StringTie	CDS	220170	220874	.	-	.	Parent=Crassostrea_gigas_newGene_10958.1
scaffold1803	StringTie	mRNA	217344	220877	.	-	.	ID=Crassostrea_gigas_newGene_10958.2;Parent=Crassostrea_gigas_newGene_10958
scaffold1803	StringTie	CDS	217344	218696	.	-	.	Parent=Crassostrea_gigas_newGene_10958.2
scaffold1803	StringTie	CDS	219394	219527	.	-	.	Parent=Crassostrea_gigas_newGene_10958.2
scaffold1803	StringTie	CDS	219750	219837	.	-	.	Parent=Crassostrea_gigas_newGene_10958.2
scaffold1803	StringTie	CDS	220170	220334	.	-	.	Parent=Crassostrea_gigas_newGene_10958.2
scaffold1803	StringTie	CDS	220679	220877	.	-	.	Parent=Crassostrea_gigas_newGene_10958.2
scaffold1804	StringTie	gene	63412	66346	.	+	.	ID=Crassostrea_gigas_newGene_10970
scaffold1804	StringTie	mRNA	63412	66346	.	+	.	ID=Crassostrea_gigas_newGene_10970.1;Parent=Crassostrea_gigas_newGene_10970
scaffold1804	StringTie	CDS	63412	63484	.	+	.	Parent=Crassostrea_gigas_newGene_10970.1
scaffold1804	StringTie	CDS	66000	66346	.	+	.	Parent=Crassostrea_gigas_newGene_10970.1
scaffold1219	StringTie	gene	565453	568257	.	+	.	ID=Crassostrea_gigas_newGene_1098
scaffold1219	StringTie	mRNA	565453	568257	.	+	.	ID=Crassostrea_gigas_newGene_1098.2;Parent=Crassostrea_gigas_newGene_1098
scaffold1219	StringTie	CDS	565453	565985	.	+	.	Parent=Crassostrea_gigas_newGene_1098.2
scaffold1219	StringTie	CDS	566036	568257	.	+	.	Parent=Crassostrea_gigas_newGene_1098.2
scaffold1805	StringTie	gene	62150	66950	.	+	.	ID=Crassostrea_gigas_newGene_10992
scaffold1805	StringTie	mRNA	66326	66652	.	+	.	ID=Crassostrea_gigas_newGene_10992.2;Parent=Crassostrea_gigas_newGene_10992
scaffold1805	StringTie	CDS	66326	66446	.	+	.	Parent=Crassostrea_gigas_newGene_10992.2
scaffold1805	StringTie	CDS	66527	66652	.	+	.	Parent=Crassostrea_gigas_newGene_10992.2
scaffold1805	StringTie	gene	66969	67821	.	-	.	ID=Crassostrea_gigas_newGene_10993
scaffold1805	StringTie	mRNA	66969	67821	.	-	.	ID=Crassostrea_gigas_newGene_10993.2;Parent=Crassostrea_gigas_newGene_10993
scaffold1805	StringTie	CDS	66969	67273	.	-	.	Parent=Crassostrea_gigas_newGene_10993.2
scaffold1805	StringTie	CDS	67718	67821	.	-	.	Parent=Crassostrea_gigas_newGene_10993.2
scaffold1805	StringTie	gene	69674	71673	.	+	.	ID=Crassostrea_gigas_newGene_10994
scaffold1805	StringTie	mRNA	69674	71673	.	+	.	ID=Crassostrea_gigas_newGene_10994.1;Parent=Crassostrea_gigas_newGene_10994
scaffold1805	StringTie	CDS	69674	69742	.	+	.	Parent=Crassostrea_gigas_newGene_10994.1
scaffold1805	StringTie	CDS	69886	69950	.	+	.	Parent=Crassostrea_gigas_newGene_10994.1
scaffold1805	StringTie	CDS	70369	70449	.	+	.	Parent=Crassostrea_gigas_newGene_10994.1
scaffold1805	StringTie	CDS	71018	71673	.	+	.	Parent=Crassostrea_gigas_newGene_10994.1
scaffold1805	StringTie	gene	73591	79548	.	+	.	ID=Crassostrea_gigas_newGene_10995
scaffold1805	StringTie	mRNA	73591	79548	.	+	.	ID=Crassostrea_gigas_newGene_10995.1;Parent=Crassostrea_gigas_newGene_10995
scaffold1805	StringTie	CDS	73591	74084	.	+	.	Parent=Crassostrea_gigas_newGene_10995.1
scaffold1805	StringTie	CDS	75379	75455	.	+	.	Parent=Crassostrea_gigas_newGene_10995.1
scaffold1805	StringTie	CDS	78041	79548	.	+	.	Parent=Crassostrea_gigas_newGene_10995.1
scaffold1805	StringTie	gene	75077	78871	.	-	.	ID=Crassostrea_gigas_newGene_10996
scaffold1805	StringTie	mRNA	75077	78871	.	-	.	ID=Crassostrea_gigas_newGene_10996.1;Parent=Crassostrea_gigas_newGene_10996
scaffold1805	StringTie	CDS	75077	76584	.	-	.	Parent=Crassostrea_gigas_newGene_10996.1
scaffold1805	StringTie	CDS	77022	78871	.	-	.	Parent=Crassostrea_gigas_newGene_10996.1
scaffold1805	StringTie	gene	168513	175225	.	+	.	ID=Crassostrea_gigas_newGene_11005
scaffold1805	StringTie	mRNA	168513	175225	.	+	.	ID=Crassostrea_gigas_newGene_11005.1;Parent=Crassostrea_gigas_newGene_11005
scaffold1805	StringTie	CDS	168513	168685	.	+	.	Parent=Crassostrea_gigas_newGene_11005.1
scaffold1805	StringTie	CDS	175096	175225	.	+	.	Parent=Crassostrea_gigas_newGene_11005.1
scaffold1219	StringTie	gene	651872	652699	.	+	.	ID=Crassostrea_gigas_newGene_1101
scaffold1219	StringTie	mRNA	651872	652699	.	+	.	ID=Crassostrea_gigas_newGene_1101.1;Parent=Crassostrea_gigas_newGene_1101
scaffold1219	StringTie	CDS	651872	652080	.	+	.	Parent=Crassostrea_gigas_newGene_1101.1
scaffold1219	StringTie	CDS	652177	652699	.	+	.	Parent=Crassostrea_gigas_newGene_1101.1
scaffold1805	StringTie	gene	247548	250786	.	-	.	ID=Crassostrea_gigas_newGene_11018
scaffold1805	StringTie	mRNA	247548	250786	.	-	.	ID=Crassostrea_gigas_newGene_11018.1;Parent=Crassostrea_gigas_newGene_11018
scaffold1805	StringTie	CDS	247548	249551	.	-	.	Parent=Crassostrea_gigas_newGene_11018.1
scaffold1805	StringTie	CDS	250746	250786	.	-	.	Parent=Crassostrea_gigas_newGene_11018.1
scaffold1805	StringTie	gene	296871	298199	.	-	.	ID=Crassostrea_gigas_newGene_11021
scaffold1805	StringTie	mRNA	296871	298199	.	-	.	ID=Crassostrea_gigas_newGene_11021.1;Parent=Crassostrea_gigas_newGene_11021
scaffold1805	StringTie	CDS	296871	297119	.	-	.	Parent=Crassostrea_gigas_newGene_11021.1
scaffold1805	StringTie	CDS	298148	298199	.	-	.	Parent=Crassostrea_gigas_newGene_11021.1
scaffold1806	StringTie	gene	2082	4518	.	+	.	ID=Crassostrea_gigas_newGene_11024
scaffold1806	StringTie	mRNA	2082	4518	.	+	.	ID=Crassostrea_gigas_newGene_11024.1;Parent=Crassostrea_gigas_newGene_11024
scaffold1806	StringTie	CDS	2082	3046	.	+	.	Parent=Crassostrea_gigas_newGene_11024.1
scaffold1806	StringTie	CDS	4086	4518	.	+	.	Parent=Crassostrea_gigas_newGene_11024.1
scaffold1806	StringTie	mRNA	2082	4516	.	+	.	ID=Crassostrea_gigas_newGene_11024.2;Parent=Crassostrea_gigas_newGene_11024
scaffold1806	StringTie	CDS	2082	2206	.	+	.	Parent=Crassostrea_gigas_newGene_11024.2
scaffold1806	StringTie	CDS	4086	4516	.	+	.	Parent=Crassostrea_gigas_newGene_11024.2
scaffold1806	StringTie	mRNA	2083	4509	.	+	.	ID=Crassostrea_gigas_newGene_11024.3;Parent=Crassostrea_gigas_newGene_11024
scaffold1806	StringTie	CDS	2083	3754	.	+	.	Parent=Crassostrea_gigas_newGene_11024.3
scaffold1806	StringTie	CDS	3955	4509	.	+	.	Parent=Crassostrea_gigas_newGene_11024.3
scaffold1806	StringTie	mRNA	3268	4245	.	+	.	ID=Crassostrea_gigas_newGene_11024.4;Parent=Crassostrea_gigas_newGene_11024
scaffold1806	StringTie	CDS	3268	3694	.	+	.	Parent=Crassostrea_gigas_newGene_11024.4
scaffold1806	StringTie	CDS	3895	4245	.	+	.	Parent=Crassostrea_gigas_newGene_11024.4
scaffold1806	StringTie	gene	39952	41812	.	+	.	ID=Crassostrea_gigas_newGene_11025
scaffold1806	StringTie	mRNA	40452	41809	.	+	.	ID=Crassostrea_gigas_newGene_11025.2;Parent=Crassostrea_gigas_newGene_11025
scaffold1806	StringTie	CDS	40452	40469	.	+	.	Parent=Crassostrea_gigas_newGene_11025.2
scaffold1806	StringTie	CDS	41142	41809	.	+	.	Parent=Crassostrea_gigas_newGene_11025.2
scaffold1806	StringTie	mRNA	40483	41808	.	+	.	ID=Crassostrea_gigas_newGene_11025.3;Parent=Crassostrea_gigas_newGene_11025
scaffold1806	StringTie	CDS	40483	40655	.	+	.	Parent=Crassostrea_gigas_newGene_11025.3
scaffold1806	StringTie	CDS	41160	41808	.	+	.	Parent=Crassostrea_gigas_newGene_11025.3
scaffold1806	StringTie	gene	39952	41810	.	-	.	ID=Crassostrea_gigas_newGene_11026
scaffold1806	StringTie	mRNA	40260	41477	.	-	.	ID=Crassostrea_gigas_newGene_11026.2;Parent=Crassostrea_gigas_newGene_11026
scaffold1806	StringTie	CDS	40260	40605	.	-	.	Parent=Crassostrea_gigas_newGene_11026.2
scaffold1806	StringTie	CDS	41110	41477	.	-	.	Parent=Crassostrea_gigas_newGene_11026.2
scaffold1807	StringTie	gene	24406	25603	.	+	.	ID=Crassostrea_gigas_newGene_11039
scaffold1807	StringTie	mRNA	24406	25603	.	+	.	ID=Crassostrea_gigas_newGene_11039.1;Parent=Crassostrea_gigas_newGene_11039
scaffold1807	StringTie	CDS	24406	24436	.	+	.	Parent=Crassostrea_gigas_newGene_11039.1
scaffold1807	StringTie	CDS	24701	24820	.	+	.	Parent=Crassostrea_gigas_newGene_11039.1
scaffold1807	StringTie	CDS	24915	25054	.	+	.	Parent=Crassostrea_gigas_newGene_11039.1
scaffold1807	StringTie	CDS	25200	25338	.	+	.	Parent=Crassostrea_gigas_newGene_11039.1
scaffold1807	StringTie	CDS	25561	25603	.	+	.	Parent=Crassostrea_gigas_newGene_11039.1
scaffold1807	StringTie	gene	85762	89390	.	-	.	ID=Crassostrea_gigas_newGene_11053
scaffold1807	StringTie	mRNA	85762	87957	.	-	.	ID=Crassostrea_gigas_newGene_11053.1;Parent=Crassostrea_gigas_newGene_11053
scaffold1807	StringTie	CDS	85762	86027	.	-	.	Parent=Crassostrea_gigas_newGene_11053.1
scaffold1807	StringTie	CDS	87147	87410	.	-	.	Parent=Crassostrea_gigas_newGene_11053.1
scaffold1807	StringTie	CDS	87903	87957	.	-	.	Parent=Crassostrea_gigas_newGene_11053.1
scaffold1807	StringTie	mRNA	85786	89390	.	-	.	ID=Crassostrea_gigas_newGene_11053.2;Parent=Crassostrea_gigas_newGene_11053
scaffold1807	StringTie	CDS	85786	86027	.	-	.	Parent=Crassostrea_gigas_newGene_11053.2
scaffold1807	StringTie	CDS	87147	87410	.	-	.	Parent=Crassostrea_gigas_newGene_11053.2
scaffold1807	StringTie	CDS	88160	88285	.	-	.	Parent=Crassostrea_gigas_newGene_11053.2
scaffold1807	StringTie	CDS	89118	89390	.	-	.	Parent=Crassostrea_gigas_newGene_11053.2
scaffold1807	StringTie	mRNA	85788	87911	.	-	.	ID=Crassostrea_gigas_newGene_11053.3;Parent=Crassostrea_gigas_newGene_11053
scaffold1807	StringTie	CDS	85788	86027	.	-	.	Parent=Crassostrea_gigas_newGene_11053.3
scaffold1807	StringTie	CDS	87147	87410	.	-	.	Parent=Crassostrea_gigas_newGene_11053.3
scaffold1807	StringTie	CDS	87688	87911	.	-	.	Parent=Crassostrea_gigas_newGene_11053.3
scaffold1808	StringTie	gene	4389	5641	.	+	.	ID=Crassostrea_gigas_newGene_11058
scaffold1808	StringTie	mRNA	4389	5641	.	+	.	ID=Crassostrea_gigas_newGene_11058.1;Parent=Crassostrea_gigas_newGene_11058
scaffold1808	StringTie	CDS	4389	4573	.	+	.	Parent=Crassostrea_gigas_newGene_11058.1
scaffold1808	StringTie	CDS	4823	5641	.	+	.	Parent=Crassostrea_gigas_newGene_11058.1
scaffold1219	StringTie	gene	700837	705551	.	+	.	ID=Crassostrea_gigas_newGene_1106
scaffold1219	StringTie	mRNA	700837	705551	.	+	.	ID=Crassostrea_gigas_newGene_1106.1;Parent=Crassostrea_gigas_newGene_1106
scaffold1219	StringTie	CDS	700837	701014	.	+	.	Parent=Crassostrea_gigas_newGene_1106.1
scaffold1219	StringTie	CDS	705371	705551	.	+	.	Parent=Crassostrea_gigas_newGene_1106.1
scaffold1808	StringTie	gene	46095	48796	.	+	.	ID=Crassostrea_gigas_newGene_11068
scaffold1808	StringTie	mRNA	46095	48796	.	+	.	ID=Crassostrea_gigas_newGene_11068.1;Parent=Crassostrea_gigas_newGene_11068
scaffold1808	StringTie	CDS	46095	46490	.	+	.	Parent=Crassostrea_gigas_newGene_11068.1
scaffold1808	StringTie	CDS	46612	46724	.	+	.	Parent=Crassostrea_gigas_newGene_11068.1
scaffold1808	StringTie	CDS	47571	47698	.	+	.	Parent=Crassostrea_gigas_newGene_11068.1
scaffold1808	StringTie	CDS	47881	48093	.	+	.	Parent=Crassostrea_gigas_newGene_11068.1
scaffold1808	StringTie	CDS	48193	48796	.	+	.	Parent=Crassostrea_gigas_newGene_11068.1
scaffold1808	StringTie	gene	52510	52988	.	-	.	ID=Crassostrea_gigas_newGene_11070
scaffold1808	StringTie	mRNA	52510	52988	.	-	.	ID=Crassostrea_gigas_newGene_11070.1;Parent=Crassostrea_gigas_newGene_11070
scaffold1808	StringTie	CDS	52510	52648	.	-	.	Parent=Crassostrea_gigas_newGene_11070.1
scaffold1808	StringTie	CDS	52795	52988	.	-	.	Parent=Crassostrea_gigas_newGene_11070.1
scaffold1808	StringTie	gene	64782	66760	.	+	.	ID=Crassostrea_gigas_newGene_11076
scaffold1808	StringTie	mRNA	64782	66760	.	+	.	ID=Crassostrea_gigas_newGene_11076.1;Parent=Crassostrea_gigas_newGene_11076
scaffold1808	StringTie	CDS	64782	65494	.	+	.	Parent=Crassostrea_gigas_newGene_11076.1
scaffold1808	StringTie	CDS	65592	66760	.	+	.	Parent=Crassostrea_gigas_newGene_11076.1
scaffold1808	StringTie	mRNA	65089	66530	.	+	.	ID=Crassostrea_gigas_newGene_11076.2;Parent=Crassostrea_gigas_newGene_11076
scaffold1808	StringTie	CDS	65089	65494	.	+	.	Parent=Crassostrea_gigas_newGene_11076.2
scaffold1808	StringTie	CDS	65592	65883	.	+	.	Parent=Crassostrea_gigas_newGene_11076.2
scaffold1808	StringTie	CDS	65910	66530	.	+	.	Parent=Crassostrea_gigas_newGene_11076.2
scaffold1808	StringTie	gene	92329	93712	.	-	.	ID=Crassostrea_gigas_newGene_11080
scaffold1808	StringTie	mRNA	92329	93712	.	-	.	ID=Crassostrea_gigas_newGene_11080.1;Parent=Crassostrea_gigas_newGene_11080
scaffold1808	StringTie	CDS	92329	92429	.	-	.	Parent=Crassostrea_gigas_newGene_11080.1
scaffold1808	StringTie	CDS	92777	93018	.	-	.	Parent=Crassostrea_gigas_newGene_11080.1
scaffold1808	StringTie	CDS	93597	93712	.	-	.	Parent=Crassostrea_gigas_newGene_11080.1
scaffold1808	StringTie	gene	147251	153632	.	-	.	ID=Crassostrea_gigas_newGene_11082
scaffold1808	StringTie	mRNA	147251	153632	.	-	.	ID=Crassostrea_gigas_newGene_11082.1;Parent=Crassostrea_gigas_newGene_11082
scaffold1808	StringTie	CDS	147251	147881	.	-	.	Parent=Crassostrea_gigas_newGene_11082.1
scaffold1808	StringTie	CDS	152796	153632	.	-	.	Parent=Crassostrea_gigas_newGene_11082.1
scaffold1808	StringTie	gene	148838	153444	.	+	.	ID=Crassostrea_gigas_newGene_11083
scaffold1808	StringTie	mRNA	148838	153444	.	+	.	ID=Crassostrea_gigas_newGene_11083.1;Parent=Crassostrea_gigas_newGene_11083
scaffold1808	StringTie	CDS	148838	150593	.	+	.	Parent=Crassostrea_gigas_newGene_11083.1
scaffold1808	StringTie	CDS	150638	153444	.	+	.	Parent=Crassostrea_gigas_newGene_11083.1
scaffold1808	StringTie	gene	172488	179182	.	+	.	ID=Crassostrea_gigas_newGene_11086
scaffold1808	StringTie	mRNA	172488	179182	.	+	.	ID=Crassostrea_gigas_newGene_11086.1;Parent=Crassostrea_gigas_newGene_11086
scaffold1808	StringTie	CDS	172488	172661	.	+	.	Parent=Crassostrea_gigas_newGene_11086.1
scaffold1808	StringTie	CDS	172892	172961	.	+	.	Parent=Crassostrea_gigas_newGene_11086.1
scaffold1808	StringTie	CDS	173063	173200	.	+	.	Parent=Crassostrea_gigas_newGene_11086.1
scaffold1808	StringTie	CDS	174108	174236	.	+	.	Parent=Crassostrea_gigas_newGene_11086.1
scaffold1808	StringTie	CDS	174840	174957	.	+	.	Parent=Crassostrea_gigas_newGene_11086.1
scaffold1808	StringTie	CDS	178900	179182	.	+	.	Parent=Crassostrea_gigas_newGene_11086.1
scaffold1809	StringTie	gene	2	35564	.	+	.	ID=Crassostrea_gigas_newGene_11090
scaffold1809	StringTie	mRNA	2	1046	.	+	.	ID=Crassostrea_gigas_newGene_11090.1;Parent=Crassostrea_gigas_newGene_11090
scaffold1809	StringTie	CDS	2	34	.	+	.	Parent=Crassostrea_gigas_newGene_11090.1
scaffold1809	StringTie	CDS	122	1046	.	+	.	Parent=Crassostrea_gigas_newGene_11090.1
scaffold1809	StringTie	mRNA	89	34813	.	+	.	ID=Crassostrea_gigas_newGene_11090.2;Parent=Crassostrea_gigas_newGene_11090
scaffold1809	StringTie	CDS	89	356	.	+	.	Parent=Crassostrea_gigas_newGene_11090.2
scaffold1809	StringTie	CDS	385	454	.	+	.	Parent=Crassostrea_gigas_newGene_11090.2
scaffold1809	StringTie	CDS	32330	34813	.	+	.	Parent=Crassostrea_gigas_newGene_11090.2
scaffold1809	StringTie	mRNA	31611	35564	.	+	.	ID=Crassostrea_gigas_newGene_11090.3;Parent=Crassostrea_gigas_newGene_11090
scaffold1809	StringTie	CDS	31611	31816	.	+	.	Parent=Crassostrea_gigas_newGene_11090.3
scaffold1809	StringTie	CDS	32022	35564	.	+	.	Parent=Crassostrea_gigas_newGene_11090.3
scaffold1164	StringTie	gene	56688	58269	.	+	.	ID=Crassostrea_gigas_newGene_111
scaffold1164	StringTie	mRNA	56688	58269	.	+	.	ID=Crassostrea_gigas_newGene_111.1;Parent=Crassostrea_gigas_newGene_111
scaffold1164	StringTie	CDS	56688	56967	.	+	.	Parent=Crassostrea_gigas_newGene_111.1
scaffold1164	StringTie	CDS	57128	57316	.	+	.	Parent=Crassostrea_gigas_newGene_111.1
scaffold1164	StringTie	CDS	57929	58134	.	+	.	Parent=Crassostrea_gigas_newGene_111.1
scaffold1164	StringTie	CDS	58239	58269	.	+	.	Parent=Crassostrea_gigas_newGene_111.1
scaffold1164	StringTie	mRNA	56688	58268	.	+	.	ID=Crassostrea_gigas_newGene_111.2;Parent=Crassostrea_gigas_newGene_111
scaffold1164	StringTie	CDS	56688	57316	.	+	.	Parent=Crassostrea_gigas_newGene_111.2
scaffold1164	StringTie	CDS	57929	58134	.	+	.	Parent=Crassostrea_gigas_newGene_111.2
scaffold1164	StringTie	CDS	58239	58268	.	+	.	Parent=Crassostrea_gigas_newGene_111.2
scaffold1810	StringTie	gene	117779	124793	.	+	.	ID=Crassostrea_gigas_newGene_11106
scaffold1810	StringTie	mRNA	117779	124793	.	+	.	ID=Crassostrea_gigas_newGene_11106.1;Parent=Crassostrea_gigas_newGene_11106
scaffold1810	StringTie	CDS	117779	117925	.	+	.	Parent=Crassostrea_gigas_newGene_11106.1
scaffold1810	StringTie	CDS	120239	120405	.	+	.	Parent=Crassostrea_gigas_newGene_11106.1
scaffold1810	StringTie	CDS	122634	122742	.	+	.	Parent=Crassostrea_gigas_newGene_11106.1
scaffold1810	StringTie	CDS	124350	124464	.	+	.	Parent=Crassostrea_gigas_newGene_11106.1
scaffold1810	StringTie	CDS	124633	124793	.	+	.	Parent=Crassostrea_gigas_newGene_11106.1
scaffold1810	StringTie	mRNA	117792	124784	.	+	.	ID=Crassostrea_gigas_newGene_11106.2;Parent=Crassostrea_gigas_newGene_11106
[truncated: 73,334 more rows]
